# Supplementary material for: Transmission routes of antibiotic resistant bacteria: a systematic review
Source: PubMed Central journal article supplement (PMC9123679; doi:10.1186/s12879-022-07360-z), 2022-05-20
Supplement: 12879_2022_7360_MOESM3_ESM.pdf [file 12879_2022_7360_MOESM3_ESM.pdf]

### Additional file 3. R Script of the systematic review by Godijk et al.

# Before running the script, make sure that all the packages are installed

# Also check the pathways for the data storage and data retrieval

#rm(list=ls())

# Clear any data left in your R, uncomment code above if you want to do so

library(foreign)

library(tidyverse)

library(rmeta)

library(msm)

library(lme4)

library(rJava)

library(xlsx)

library(gmodels)

##### Meta-analysis  
#####

#install.packages("devtools")

#library(devtools)

#install.packages("digest")

#install.packages("curl")

#devtools::install\_github("MathiasHarrer/dmetar")

#install.packages("dmetar")

#install.packages("remotes")

#library("remotes")

#install\_github("MathiasHarrer/dmetar")

#backports

#library(dmetar)

# We will use a random effects meta analysis since not all study populations come from the same underlying population

# By using this method, we account for more variance than when drawn from a single population

```
# There is another source of variance due to the fact that not all stem from the same underlying population
```

```
# We assume a distribution of effect sizes instead of 1 effect size
```

```
# we estimate the mean distribution of true effect sizes
```

```
# So next to some sampling error there is another error.
```

```
# The REM pays more attention to small studies when pooling the overall estimate
```

```
#DerSimonian-Laird estimator or Maximum Likelihood als tau
```

```
library(meta)
```

```
library(metafor)
```

```
# Load the final data file
```

```
Transmission <- read.xlsx("PATH TO YOUR COMPUTER/Transmission_Review_Data_180820.xlsx",1)
```

```
# Replace PATH TO YOUR COMPUTER to were you want to save the excel file
```

```
Transmission <- Transmission[,c(3:37)]
```

```
Transmission$Num_Estimate<-as.numeric(as.character(paste(Transmission$Num_Estimate)))
```

```
Transmission$Num_ub<-as.numeric(as.character(paste(Transmission$Num_ub)))
```

```
Transmission$Num_lb<-as.numeric(as.character(paste(Transmission$Num_lb)))
```

```
Transmission$Num_SE<-as.numeric(as.character(paste(Transmission$Num_SE)))
```

```
#Which bacteria
```

```
Table_Bacteria_grouped<-table(Transmission$GroupGood)
```

```
Table_Bacteria_grouped
```

```
pie(Table_Bacteria_grouped,main = "Organisms studied",r=1)
```

```
rm(Table_Bacteria_grouped)
```

```
#write.xlsx(Table_Bacteria_grouped, "PATH TO YOUR COMPUTER/Bacteria.xlsx")
```

```
# Replace PATH TO YOUR COMPUTER to were you want to save the excel file
```

```
test<-function (bacteriagroup) {
```

```

if ("E. faecium and L. acidophilus " %in% bacteriagroup) {
  stop("Error: Recoding bacteria groups went wrong")
}
}

test(Transmission$GroupGood) #We are checking if the recoding of the bacteria group went correct

# Transmission routes
Table_TransmissionRouteGroup <-table(Transmission$Transmission.Group)
Table_TransmissionRouteGroup

attach(Transmission)
# Number of methods
Methods<-table(Transmission$MethodGroup)
Methods

#Countries
Countries<-table(Transmission$Country)
Countries
barplot(Countries)
#write.xlsx(Countries, "PATH TO YOUR COMPUTER/Countries.xlsx")
# Replace PATH TO YOUR COMPUTER to were you want to save the excel file

#Subset methods
Modelling<-subset(Transmission, MethodGroup=="Modelling")
Genes<-subset(Transmission, Method.of.estimation=="Genes")
Stats<-subset(Transmission, MethodGroup=="Statistics", select = c(Method.of.estimation))
BacterialIntake<-subset(Transmission, MethodGroup=="BacterialIntake")

OR<-subset(Stats, Method.of.estimation=="OR", select = c(Method.of.estimation))
Risk<-subset(Stats, Method.of.estimation=="Risk", select = c(Method.of.estimation))

```

```

PR<-subset(Stats, Method.of.estimation=="PR", select = c(Method.of.estimation))
TR<-subset(Stats, Method.of.estimation=="Transmission rate", select = c(Method.of.estimation))
R0<-subset(Modelling, Method.of.estimation=='R0')
TransmissionRate<-subset(Modelling, Method.of.estimation=='transmission rate')
ImportanceRoute<-subset(Modelling, Method.of.estimation=='Importance of Route')
Casesperday<-subset(Modelling, Method.of.estimation=='cases per day')
Incidence<-subset(Modelling, Method.of.estimation=='Incidence')
Incidence_rate_ratio<-subset(Modelling, Method.of.estimation=='Incidence rate ratios ')
Acquisition<-subset(Modelling, Method.of.estimation=='acquisition rate')
TRratio<-subset(Modelling, Method.of.estimation=='acquisition rate')

```

```
#Methods of statistics
```

```

names_stats<-c("OR", "Risk", "PR", "TR")
count<-c(paste(count(OR)), paste(count(Risk)), paste(count(PR)),paste(count(TR)))
count
Table_Statistical_methods<-data.frame(names_stats, count)
Table_Statistical_methods

```

```
#Transmission routes of statistics
```

```

Table_TransmissionRouteGroupS <-subset(Transmission,
Transmission$Method.of.estimation=="OR")
Table_TransmissionRouteGroupS<- table(Table_TransmissionRouteGroupS$Transmission.Group)
Table_TransmissionRouteGroupS
Table_TransmissionRouteGroupS <-subset(Transmission,
Transmission$Method.of.estimation=="PR")
Table_TransmissionRouteGroupS<- table(Table_TransmissionRouteGroupS$Transmission.Group)
Table_TransmissionRouteGroupS
Table_TransmissionRouteGroupS <-subset(Transmission,
Transmission$Method.of.estimation=="Risk")
Table_TransmissionRouteGroupS<- table(Table_TransmissionRouteGroupS$Transmission.Group)
Table_TransmissionRouteGroupS

```

```
Table_TransmissionRouteGroupS <-subset(Transmission,
Transmission$Method.of.estimation=="RR")

Table_TransmissionRouteGroupS<- table(Table_TransmissionRouteGroupS$Transmission.Group)

Table_TransmissionRouteGroupS
```

```
rm(TR,OR,PR, Risk, count,names_stats, Table_TransmissionRouteGroupS)
```

```
#Transmission routes of genes
```

```
Table_TransmissionRouteGroupG <-subset(Transmission,
Transmission$Method.of.estimation=="Genes")

Table_TransmissionRouteGroupG<- table(Table_TransmissionRouteGroupG$Transmission.Group)

Table_TransmissionRouteGroupG

rm(Table_TransmissionRouteGroupG)
```

```
#Methods of Modelling
```

```
names_modelling<-c("R0", "Attributable%", "Transmission rate", "cases per day", "Incidence",
"Incidence rate ratio", "Acquisition rate")
```

```
count<-c(paste(count(R0)),paste(count(ImportanceRoute)), paste(count(TransmissionRate)),
paste(count(Casesperday)), paste(count(Incidence)), paste(count(Incidence_rate_ratio)),
paste(count(Acquisition)))
```

```
count
```

```
Table_Modelling_methods<-data.frame(names_modelling, count)
```

```
Table_Modelling_methods#One other is transmission rate (week), this I have to count as well as
transmission rate and divide by seven + make a note that I did this
```

```
Modelling$Method.of.estimation
```

```
levels(Modelling$Method.of.estimation) # Those who have a value labelled "missing" we decided
not to report
```

```
#Transmission routes of modelling
```

```
Table_TransmissionRouteGroupM <-subset(Transmission,
Transmission$Method.of.estimation=="R0")

Table_TransmissionRouteGroupM<- table(Table_TransmissionRouteGroupM$Transmission.Group)

Table_TransmissionRouteGroupM
```

```

Table_TransmissionRouteGroupM <-subset(Transmission,
Transmission$Method.of.estimation=="Importance of Route")

Table_TransmissionRouteGroupM<- table(Table_TransmissionRouteGroupM$Transmission.Group)

Table_TransmissionRouteGroupM

Table_TransmissionRouteGroupM <-subset(Transmission,
Transmission$Method.of.estimation=="cases per day")

Table_TransmissionRouteGroupM<- table(Table_TransmissionRouteGroupM$Transmission.Group)

Table_TransmissionRouteGroupM

Table_TransmissionRouteGroupM <-subset(Transmission,
Transmission$Method.of.estimation=="Incidence rate ratios ")

Table_TransmissionRouteGroupM<- table(Table_TransmissionRouteGroupM$Transmission.Group)

Table_TransmissionRouteGroupM

rm(Table_TransmissionRouteGroupM)

rm(count,names_modelling, TransmissionRate, ImportanceRoute, R0)

#Countries

Transmission$Country<-as.factor(Transmission$Country)

Table_Country<-table(Transmission$Country)

Table_Country

pie(Table_Country)

##### Analysis which pathogens in
the groups for meta-analysis #####

#First make subsets for eacht route that we do a meta-analysis for

Occupational_Exposure<-subset(Transmission, Transmission$Transmission.Group=="Occupational
Exposure")

Family_member_occupational_exposure<- subset(Transmission,
Transmission$Transmission.Group=="Family member occupational exposure")

Animal_to_air<-subset(Transmission, Transmission$Transmission.Group=="Animal-> Air")

Animal_to_environment<-subset(Transmission, Transmission$Transmission.Group=="Animal ->
environment")

Animal_contact<-subset(Transmission, Transmission$Transmission.Group=="Animal Contact")

```

```

Breast_feeding<-subset(Transmission, Transmission$Transmission.Group=="Breast feeding")

Contact_with_infected<-subset(Transmission, Transmission$Transmission.Group=="Contact with
infected person")

Eating_meat<-subset(Transmission, Transmission$Transmission.Group=="Eating Meat -> human")

Family_member_colonised<-subset(Transmission, Transmission$Transmission.Group=="Family
member colonised")

Human_to_nearbyenv<-subset(Transmission, Transmission$Transmission.Group=="Human-> nearby
environment")

Livestock_to_drinking_water<-subset(Transmission, Transmission$Transmission.Group=="Livestock-
> drinking water")

Mother_to_child<-subset(Transmission, Transmission$Transmission.Group=="Mother to child")

Pet_to_human<-subset(Transmission, Transmission$Transmission.Group=="Pet-> human")

Prior_col_patient<-subset(Transmission, Transmission$Transmission.Group=="Prior colonised
patient in room")

Space_sharing<-subset(Transmission, Transmission$Transmission.Group=="Space sharing")

Travelling<-subset(Transmission, Transmission$Transmission.Group=="Travelling")

Contaminated_room<-subset(Transmission, Transmission$Transmission.Group=="Contaminated
room")

Sharing_water_source_with_animals<-subset(Transmission,
Transmission$Transmission.Group=="Sharing water source with animals")

Non_commercial_animal_keeping<-subset(Transmission, Transmission$Transmission.Group=="Non
commercial animal keeping")

Animal_to_animal<-subset(Transmission, Transmission$Transmission.Group=="Animal -> animal")
levels(Transmission$Transmission.Group)

Nearby_env_tohuman<-subset(Transmission, Transmission$Transmission.Group=="Nearby
environment -> human")

#Per route, calculate the bacteria

Bacteria_Occupational<-table(Occupational_Exposure$GroupGood)

Bacteria_Occupational

Bacteria_Fam_Occu_Exp<-table(Family_member_occupational_exposure$GroupGood)

Bacteria_Fam_Occu_Exp

Bacteria_Animal_to_Air<-table(Animal_to_air$GroupGood)

Bacteria_Animal_to_Air

```

Bacteria\_Animal\_to\_environment<-table(Animal\_to\_environment\$GroupGood)

Bacteria\_Animal\_to\_environment

Bacteria\_Sharing\_water\_source\_with\_animals<-  
table(Sharing\_water\_source\_with\_animals\$GroupGood)

Bacteria\_Sharing\_water\_source\_with\_animals

Bacteria\_Non\_commercial\_animal\_keeping<-table(Non\_commercial\_animal\_keeping\$GroupGood)

Bacteria\_Non\_commercial\_animal\_keeping

Bacteria\_Breast\_feeding<-table(Breast\_feeding\$GroupGood)

Bacteria\_Breast\_feeding

Bacteria\_Contact\_with\_infected<-table(Contact\_with\_infected\$GroupGood)

Bacteria\_Contact\_with\_infected

Bacteria\_Eating\_meat<-table(Eating\_meat\$GroupGood)

Bacteria\_Eating\_meat

Bacteria\_Family\_mem\_colonised<-table(Family\_member\_colonised\$GroupGood)

Bacteria\_Family\_mem\_colonised

Bacteria\_human\_to\_nearbyenv<-table(Human\_to\_nearbyenv\$GroupGood)

Bacteria\_human\_to\_nearbyenv

Bacteria\_livestock\_to\_drinkw<-table(Livestock\_to\_drinking\_water\$GroupGood)

Bacteria\_livestock\_to\_drinkw

Bacteria\_Mother\_to\_child<-table(Mother\_to\_child\$GroupGood)

Bacteria\_Mother\_to\_child

Bacteria\_Pet\_to\_human<-table(Pet\_to\_human\$GroupGood)

Bacteria\_Pet\_to\_human

Bacteria\_prior\_col\_patient<-table(Prior\_col\_patient\$GroupGood)

Bacteria\_prior\_col\_patient

Bacteria\_Travelling<-table(Travelling\$GroupGood)

Bacteria\_Travelling

Bacteria\_space\_sharing<-table(Space\_sharing\$GroupGood)

Bacteria\_space\_sharing

Bacteria\_Contaminated\_room<-table(Contaminated\_room\$GroupGood)

Bacteria\_Contaminated\_room



```
##### Calculate per route, per pathogen which methods have been used ####
```

```
CrossTable(Contaminated_room$GroupGood, Contaminated_room$Method.of.estimation)
```

```
CrossTable(Occupational_Exposure$GroupGood, Occupational_Exposure$Method.of.estimation)
```

```
CrossTable(Animal_to_air$GroupGood, Animal_to_air$Method.of.estimation)
```

```
CrossTable(Animal_to_environment$GroupGood, Animal_to_environment$Method.of.estimation)
```

```
Table<-table(subset(Sharing_water_source_with_animals, Sharing_water_source_with_animals$GroupGood=="E.Coli")$Method.of.estimation)
```

```
Table
```

```
CrossTable(Non_commercial_animal_keeping$GroupGood, Non_commercial_animal_keeping$Method.of.estimation)
```

```
CrossTable(Breast_feeding$GroupGood, Breast_feeding$Method.of.estimation)
```

```
CrossTable(Contact_with_infected$GroupGood, Contact_with_infected$Method.of.estimation)
```

```
Table1<-table(subset(Eating_meat, Eating_meat$GroupGood=="E.Coli")$Method.of.estimation)
```

```
Table1
```

```
CrossTable(Family_member_colonised$GroupGood, Family_member_colonised$Method.of.estimation)
```

```
CrossTable(Family_member_occupational_exposure$GroupGood, Family_member_occupational_exposure$Method.of.estimation)
```

```
CrossTable(Human_to_nearbyenv$GroupGood, Human_to_nearbyenv$Method.of.estimation)
```

```
CrossTable(Mother_to_child$GroupGood, Mother_to_child$Method.of.estimation)
```

```
CrossTable(Pet_to_human$GroupGood, Pet_to_human$Method.of.estimation)
```

```
CrossTable(Prior_col_patient$GroupGood, Prior_col_patient$Method.of.estimation)
```

```
CrossTable
```

```
CrossTable(Animal_to_animal$GroupGood, Animal_to_animal$Method.of.estimation)
```

```
rm(Table, Table1)
```

```
##### Starting with OR#####
```

```
OR<-subset(Transmission, Method.of.estimation=="OR")
```

```
OR$Num_ub <-as.numeric(as.character(OR$ub))
```

```
OR$Num_Estimate <-as.numeric(as.character(OR$Estimate))
```

```
OR$ub[239]#"B 2.8632"
```

OR\$Num\_ub[239]<-2.8632 # estimates keeps appearing with a B in front in our dataset when we load in into R, therefore we replace it with just the value

```
OR$Num_ub[239]
```

```
OR$Estimate[239]
```

```
OR$Num_Estimate[239]<-2.04
```

```
OR$Estimate[239]
```

```
OR$logOR<-log(OR$Num_Estimate)
```

```
OR$loglb<-log(OR$Num_lb)
```

```
OR$logub<-log(OR$Num_ub)
```

```
OR$diflogCI<- OR$logub-OR$loglb
```

```
OR$logSE<-OR$diflogCI/3.92
```

```
OR$logSE[17]
```

```
OR$logSE[17]<-(1.88706965)/1.96
```

```
OR$logSE[17]
```

```
OR$logOR[17]<-log(6.60)
```

```
OR$logSE[16]
```

```
OR$logSE[16]<-(0.69314718--2.30258509)/1.96
```

```
OR$logSE[16]
```

```
OR$logSE[33]
```

```
OR$logSE[33]<-(3.09104245-0.530628251)/1.96
```

```
OR$logSE[33]
```

```
OR$logSE[34]
```

```
OR$logSE[34]<-(2.77258872-0.262364264)/1.96
```

```
OR$logSE[34]
```

```
#Creating subsets per transmission group for ORs
```

```
table((OR$Transmission.Group))
```

```
OR_Family_member_occu_exp<-subset(OR, Transmission.Group == "Family member occupational exposure")
```

```

OR_Occupational_Exp <-subset(OR, Transmission.Group=="Occupational Exposure")
OR_Livestock_to_drink_water<- subset(OR, Transmission.Group=="Livestock-> drinking water")
OR_Nearbyfarm_to_human <-subset(OR, Transmission.Group=="Nearby farm-> human")
OR_Eating_Meat<- subset(OR, Transmission.Group=="Eating Meat -> human")
OR_Waterdrink_to_human<-subset(OR, Transmission.Group=="Water (drinking) -> human")
OR_Pet_to_human<-subset(OR, Transmission.Group=="Pet-> human")
OR_Animal_contact<-subset(OR, Transmission.Group=="Animal Contact")
OR_Travelling<-subset(OR, Transmission.Group=="Travelling")
OR_Prior_col_roomoccu<-subset(OR, Transmission.Group=="Prior colonised patient in room")
OR_Mother_to_Child<- subset(OR, Transmission.Group=="Mother to child")
OR_Family_mem_colonised<-subset(OR, Transmission.Group=="Family member colonised")
OR_Contaminated_room<- subset(OR, Transmission.Group=="Contaminated room")
OR_Contact_inf_person<-subset(OR, Transmission.Group=="Contact with infected person")
OR_Space_sharing<-subset(OR, Transmission.Group=="Space sharing")
OR_Fomites<-subset(OR, Transmission.Group=="Fomites")

```

```
# Now for risk ratios
```

```
RR<-subset(Transmission, Method.of.estimation=="RR")
```

```
# I am making subsets for prevalence ratio's
```

```
PR<- subset(Transmission, Method.of.estimation=="PR")
```

```
PR$LogPR<-log(PR$Num_Estimate)
```

```
# We also need to back calculate the SE for all the estimates
```

```
# First we check our code with an example of which we know the answer, the answer should be 0.3474
```

```
(log(0.869331)-log(.44))/1.96 # the formula is correct
```

```
PR$SE_logPR<-(log(PR$Num_ub)-log(PR$Num_Estimate))/1.96
```

```
head(PR$Num_Estimate)
```

```
PR_alles<-metagen(log(PR$Num_Estimate), lower = log(PR$Num_lb), upper = log(PR$Num_ub),
studlab = paste(PR$Author), sm="RR")
```

```
PR_alles
```

```
levels(PR$Transmission.Group)
```

```
PR_Fam_Col<-subset(PR, PR$Transmission.Group=="Family member colonised")
```

```
PR_Occupation_Exp<-subset(PR, PR$Transmission.Group=="Occupational Exposure")
```

```
PR_Fam_Occu_Exp<-subset(PR, PR$Transmission.Group=="Family member occupational exposure")
```

```
PR_Pet_Human<-subset(PR, PR$Transmission.Group=="Pet-> human")
```

```
PR_SpaceShare<-subset(PR, PR$Transmission.Group=="Space sharing")
```

```
PR_Travel<-subset(PR, PR$Transmission.Group=="Travelling")
```

```
# I am making subsets for risks
```

```
# I created subsets for all possible levels of Transmission groups for risk
```

```
Risk<-subset(Transmission, Method.of.estimation=="Risk")
```

```
Risk$Sample.size<-as.numeric(as.character(Risk$Sample.size)) # Make sample size numeric
```

```
Risk$Num_Estimate<- as.numeric(gsub("[\\%,]", "", Risk$Estimate)) #Make the percentage numeric  
and remove the % sign
```

```
Risk$Num_Estimate<- Risk$Num_Estimate/100 # We turn this into proportion instead of percentage
```

```
Risk$Num_Estimate<-abs(Risk$Num_Estimate)
```

```
Risk$Num_Estimate[176]
```

```
Risk$Num_Estimate[176]<-0.884
```

```
Risk$Num_Estimate[176]
```

```
Risk$SE<- sqrt(Risk$Num_Estimate*(1-Risk$Num_Estimate)/Risk$Sample.size) # This is the normal  
SE
```

```
# Before I can do a meta analysis for proportions, I have to give eacht study an ID (this cannot be  
author as some authors have multiple estimates)
```

```
Risk$id<-c(1:242)
```

```
Risk$id
```

```
#Now I have to get 1) sample size 2) number of events 3) sample size- number of events
```

```

#I need this for GLMER to get a logit estimate
Risk$Events<-Risk$Sample.size*Risk$Num_Estimate
#Risk<-Risk[,c(1:5, 7:36,6)]
Risk$Events_integer<-round(Risk$Events)
Risk$No_Event<-Risk$Sample.size-Risk$Events_integer

Risk_Occupational_Exposure<-subset(Risk, Risk$Transmission.Group=="Occupational Exposure")
Risk_Fam_mem_occu_exposure<-subset(Risk, Risk$Transmission.Group=="Family member occupational exposure")
Risk_Travelling<-subset(Risk, Risk$Transmission.Group=="Travelling")
Risk_hum_to_neareenvironment<-subset(Risk, Risk$Transmission.Group=="Human-> nearby environment")
Risk_Cont_Inf_Person<-subset(Risk, Risk$Transmission.Group=="Contact with infected person")
Risk_Animal_to_Air<-subset(Risk, Risk$Transmission.Group=="Animal-> Air")
Risk_Animal_to_water<-subset(Risk, Risk$Transmission.Group=="Animal-> Water")
Risk_Animal_to_environment<-subset(Risk, Risk$Transmission.Group=="Animal -> environment")
Risk_Household_Col<-subset(Risk, Risk$Transmission.Group=="Household member colonised")
Risk_Mother_to_child<-subset(Risk, Risk$Transmission.Group=="Mother to child")
Risk_Water_drink_Human<-subset(Risk, Risk$Transmission.Group=="Water (drinking) -> human")
Risk_Organ<-subset(Risk, Risk$Transmission.Group=="Organ")
Risk_Fomites<-subset(Risk, Risk$Transmission.Group=="Fomites")
Risk_Pet_to_human<-subset(Risk, Risk$Transmission.Group=="Pet-> human")
Risk_Water_exposure_to_human<-subset(Risk, Risk$Transmission.Group=="Water(exposure)-> human")
Risk_Food_to_animal<-subset(Risk, Risk$Transmission.Group=="Food-> animal")
Risk_Intervention<-subset(Risk, Risk$Transmission.Group=="Intervention")
Risk_Human_to_Air <-subset(Risk, Risk$Transmission.Group=="Human-> Air")
Risk_Animal_to_Animal<-subset(Risk, Risk$Transmission.Group=="Animal -> animal")
Risk_Motheranimal_to_animalchild<-subset(Risk, Risk$Transmission.Group=="Mother (animal) -> child")

```

```
##### Meta analysis per pathogen
per route #####
```

```
##### Animal to air
```

```
Animal_to_air_Ecoli_Risk<- subset(Risk_Animal_to_Air, Risk_Animal_to_Air$GroupGood=="E.Coli")
poultry_to_air_Ecoli_Risk<-Animal_to_air_Ecoli_Risk[c(2,3),]
pig_to_air_Ecoli_Risk<-Animal_to_air_Ecoli_Risk[c(1,4),]
```

```
poultry_to_air_Ecoli_Risk$id<-c(1,2)
```

```
poultry_to_air_Ecoli_Risk$Num_Estimate<- (as.numeric(gsub("[\\%]", "",
poultry_to_air_Ecoli_Risk$Estimate)))/100
```

```
poultry_to_air_Ecoli_Risk$Sample.size<-
as.numeric(as.character(poultry_to_air_Ecoli_Risk$Sample.size))
```

```
poultry_to_air_Ecoli_Risk$Events<-
poultry_to_air_Ecoli_Risk$Sample.size*poultry_to_air_Ecoli_Risk$Num_Estimate
```

```
poultry_to_air_Ecoli_Risk$Events_integer<-round(poultry_to_air_Ecoli_Risk$Events)
```

```
poultry_to_air_Ecoli_Risk$No_Event<-poultry_to_air_Ecoli_Risk$Sample.size-
poultry_to_air_Ecoli_Risk$Events_integer
```

```
#Dit klopt niet
```

```
model.AtoA_EcoliRisk_poultry<-
glmer(Events_integer/Sample.size~1+(1|id),weights=Sample.size,data=poultry_to_air_Ecoli_Risk,fa
mily="binomial")
```

```
summary(model.AtoA_EcoliRisk_poultry)
```

```
se.logit.AtoApoultry <- sqrt(vcov(model.AtoA_EcoliRisk_poultry))
```

```
model.AtoA_EcoliRisk_poultry@beta
```

```
pig_to_air_Ecoli_Risk$id<-c(1,2)
```

```
pig_to_air_Ecoli_Risk$Num_Estimate<- (as.numeric(gsub("[\\%]", "",
pig_to_air_Ecoli_Risk$Estimate)))/100
```

```
pig_to_air_Ecoli_Risk$Sample.size<-as.numeric(as.character(pig_to_air_Ecoli_Risk$Sample.size))
```

```
pig_to_air_Ecoli_Risk$Events<-
pig_to_air_Ecoli_Risk$Sample.size*pig_to_air_Ecoli_Risk$Num_Estimate
```

```
pig_to_air_Ecoli_Risk$Events_integer<-round(pig_to_air_Ecoli_Risk$Events)
```

```
pig_to_air_Ecoli_Risk$No_Event<-pig_to_air_Ecoli_Risk$Sample.size-  
pig_to_air_Ecoli_Risk$Events_integer
```

```
model.pig_to_air_Ecoli_Risk<-  
glmer(Events_integer/Sample.size~1+(1|id),weights=Sample.size,data=pig_to_air_Ecoli_Risk,family=  
"binomial")
```

```
summary(model.pig_to_air_Ecoli_Risk)
```

```
se.logit.AtoApig <- sqrt(vcov(model.pig_to_air_Ecoli_Risk))
```

```
model.pig_to_air_Ecoli_Risk@beta
```

```
Animal_to_air_Sareus_Risk<- subset(Risk_Animal_to_Air, Risk_Animal_to_Air$GroupGood=="S.  
Aureus")
```

```
Pig_to_air_Sareus_Risk<-Animal_to_air_Sareus_Risk[c(1,2),]
```

```
Cattle_to_air_Sareus_Risk<-Animal_to_air_Sareus_Risk[c(3:24),]
```

```
Pig_to_air_Sareus_Risk$id<-c(1,2)
```

```
Pig_to_air_Sareus_Risk$Num_Estimate<- (as.numeric(gsub("[\\%]", "",  
Pig_to_air_Sareus_Risk$Estimate)))/100
```

```
Pig_to_air_Sareus_Risk$Sample.size<-as.numeric(as.character(Pig_to_air_Sareus_Risk$Sample.size))
```

```
Pig_to_air_Sareus_Risk$Events<-
```

```
Pig_to_air_Sareus_Risk$Sample.size*Pig_to_air_Sareus_Risk$Num_Estimate
```

```
Pig_to_air_Sareus_Risk$Events_integer<-round(Pig_to_air_Sareus_Risk$Events)
```

```
Pig_to_air_Sareus_Risk$No_Event<-Pig_to_air_Sareus_Risk$Sample.size-
```

```
Pig_to_air_Sareus_Risk$Events_integer
```

```
model.pig_to_air_Saureus_Risk<-
```

```
glmer(Events_integer/Sample.size~1+(1|id),weights=Sample.size,data=Pig_to_air_Sareus_Risk,famil  
y="binomial")
```

```
se.logit.AtoApigAureus<- sqrt(vcov(model.pig_to_air_Saureus_Risk))
```

```
Cattle_to_air_Sareus_Risk$id<-c(1:22)
```

```
Cattle_to_air_Sareus_Risk$Num_Estimate<- (as.numeric(gsub("[\\%]", "",  
Cattle_to_air_Sareus_Risk$Estimate)))/100
```

```

Cattle_to_air_Sareus_Risk$Sample.size<-
as.numeric(as.character(Cattle_to_air_Sareus_Risk$Sample.size))

Cattle_to_air_Sareus_Risk$Events<-
Cattle_to_air_Sareus_Risk$Sample.size*Cattle_to_air_Sareus_Risk$Num_Estimate

Cattle_to_air_Sareus_Risk$Events_integer<-round(Cattle_to_air_Sareus_Risk$Events)

Cattle_to_air_Sareus_Risk$No_Event<-Cattle_to_air_Sareus_Risk$Sample.size-
Cattle_to_air_Sareus_Risk$Events_integer

model.cattle.to.air.risk<-
glmer(Events_integer/Sample.size~1+(1|id),weights=Sample.size,data=Cattle_to_air_Sareus_Risk,fa
mily="binomial")

se.logit.AtoAcattle<-sqrt(vcov(model.cattle.to.air.risk))

##### Animal to animal

# E. coli

chicken_to_chicken_EColiTR<- subset(Animal_to_animal, Animal_to_animal$GroupGood=="E.Coli")
# All are poultry

chicken_to_chicken_EColiTR<-
subset(chicken_to_chicken_EColiTR,chicken_to_chicken_EColiTR$Method.of.estimation=="transmis
sion rate")

#cannot be pooled due to study dissimilarities, its the same study but 1 has infected chicken and the
other not so they do not estimate the same thing

# S. Aureus

animal_to_animal_Saurues<-subset(Animal_to_animal, Animal_to_animal$GroupGood=="S.
Aureus")

pig_to_pig_Saureus<-subset(Animal_to_animal, Animal_to_animal$Animal.involved.in.route=="pig")
# could not be pooled, same study different time frame (just after release vs weeks after release)

cattle_to_cattle_Saureus<-subset(Animal_to_animal,
Animal_to_animal$Method.of.estimation=="transmission rate (week)")
# could not be pooled, same study different time frame (just after release vs weeks after release)

#R0

animal_to_animal_Saurues_r0<-subset(Animal_to_animal, Animal_to_animal$GroupGood=="S.
Aureus" & Animal_to_animal$Method.of.estimation=="R0")

```



```
animal_to_animal_Saurues_r0$logOR<-log(animal_to_animal_Saurues_r0$Num_Estimate)
```

```
animal_to_animal_Saurues_r0$loglb<-log(animal_to_animal_Saurues_r0$Num_lb)
```

```
animal_to_animal_Saurues_r0$logub<-log(animal_to_animal_Saurues_r0$Num_ub)
```

```
animal_to_animal_Saurues_r0$diflogCI<- animal_to_animal_Saurues_r0$logub-  
animal_to_animal_Saurues_r0$loglb
```

```
animal_to_animal_Saurues_r0$logSE<-animal_to_animal_Saurues_r0$diflogCI/3.92
```

```
r0.animalanimal<-rma(yi = (animal_to_animal_Saurues_r0$logOR) , sei =  
(animal_to_animal_Saurues_r0$logSE), method = "ML",measure = "OR")
```

```
summary(r0.animalanimal) #moet logor en log se nog toevoegen hier, helaas
```

```
?rma
```

```
#S. pseudointermedius
```

```
pet_to_pet<-subset(Animal_to_animal, Animal_to_animal$GroupGood=="Staphylococcus  
pseudintermedius")
```

```
pet_to_pet_risk_speudi<-subset(pet_to_pet, pet_to_pet$Method.of.estimation=="Risk")
```

```
pet_to_pet_risk_speudi$id<-c(1,2)
```

```
pet_to_pet_risk_speudi$Num_Estimate<- (as.numeric(gsub("[\\%,]", "",  
pet_to_pet_risk_speudi$Estimate)))/100
```

```
pet_to_pet_risk_speudi$Sample.size<-  
as.numeric(as.character(pet_to_pet_risk_speudi$Sample.size))
```

```
pet_to_pet_risk_speudi$Events<-  
pet_to_pet_risk_speudi$Sample.size*pet_to_pet_risk_speudi$Num_Estimate
```

```
pet_to_pet_risk_speudi$Events_integer<-round(pet_to_pet_risk_speudi$Events)
```

```
pet_to_pet_risk_speudi$No_Event<-pet_to_pet_risk_speudi$Sample.size-  
pet_to_pet_risk_speudi$Events_integer
```

```
model.pet_to_pet_speudo.risk<-
```

```
glmer(Events_integer/Sample.size~1+(1|id),weights=Sample.size,data=pet_to_pet_risk_speudi,famil  
y="binomial")
```

```
summary(model.pet_to_pet_speudo.risk)
```

```
se.logit.pet.Spseudo<-sqrt(vcov(model.pet_to_pet_speudo.risk))
```

```
##### Animal to environment
```

```
# E. coli
```

```
Animal_to_environment_Ecoli<-subset(Animal_to_environment,  
Animal_to_environment$GroupGood=="E.Coli")
```

```
pig_to_env_ecoli<-subset(Animal_to_environment_Ecoli,  
Animal_to_environment_Ecoli$Animal.involved.in.route=="pig")
```

```
poultry_to_env<-subset(Animal_to_environment_Ecoli,  
Animal_to_environment_Ecoli$Animal.involved.in.route=="poultry")
```

```
pig_to_env_ecoli$id<-c(1,2)
```

```
pig_to_env_ecoli$Num_Estimate<- (as.numeric(gsub("\\%",",", pig_to_env_ecoli$Estimate)))/100
```

```
pig_to_env_ecoli$Sample.size<-as.numeric(as.character(pig_to_env_ecoli$Sample.size))
```

```
pig_to_env_ecoli$Events<-pig_to_env_ecoli$Sample.size*pig_to_env_ecoli$Num_Estimate
```

```
pig_to_env_ecoli$Events_integer<-round(pig_to_env_ecoli$Events)
```

```
pig_to_env_ecoli$No_Event<-pig_to_env_ecoli$Sample.size-pig_to_env_ecoli$Events_integer
```

```
model.pig_to_env<-
```

```
glmer(Events_integer/Sample.size~1+(1|id),weights=Sample.size,data=pig_to_env_ecoli,family="binomial")
```

```
se.logit.pig_env<-sqrt(vcov(model.pig_to_env))
```

```
se.logit.pig_env
```

```
poultry_to_env<-poultry_to_env[c(1,2),] #only first 2 are similar
```

```
poultry_to_env$id<-c(1,2)
```

```
poultry_to_env$Num_Estimate<- (as.numeric(gsub("\\%",",", poultry_to_env$Estimate)))/100
```

```
poultry_to_env$Sample.size<-as.numeric(as.character(poultry_to_env$Sample.size))
```

```
poultry_to_env$Events<-poultry_to_env$Sample.size*poultry_to_env$Num_Estimate
```

```
poultry_to_env$Events_integer<-round(poultry_to_env$Events)
```

```
poultry_to_env$No_Event<-poultry_to_env$Sample.size-poultry_to_env$Events_integer
```

```
model.poultry_to_env<-  
glmer(Events_integer/Sample.size~1+(1|id),weights=Sample.size,data=poultry_to_env,family="bino  
mial")
```

```
se.logit.poultry_env<-sqrt(vcov(model.poultry_to_env))
```

```
##### Sharing water
```

```
# same study so have to check why there are different estimates
```

```
# not going to pool as it compares wild-life and livestock sharing water with only livestock sharing
```

```
##### non commercial animal  
keeping
```

```
# Not pooled due to study asimilarities, all different kind of animals
```

```
##### Breast feeding
```

```
# E. coli
```

```
BreastF_ecoli<-subset(Breast_feeding, Breast_feeding$GroupGood=="E.Coli")
```

```
BreastF_ecoli_OR<- subset(BreastF_ecoli, BreastF_ecoli$Method.of.estimation=="OR")
```

```
BreastF_ecoli_OR$logOR<-log(BreastF_ecoli_OR$Num_Estimate)
```

```
BreastF_ecoli_OR$loglb<-log(BreastF_ecoli_OR$Num_lb)
```

```
BreastF_ecoli_OR$logub<-log(BreastF_ecoli_OR$Num_ub)
```

```
BreastF_ecoli_OR$diflogCI<- BreastF_ecoli_OR$logub-BreastF_ecoli_OR$loglb
```

```
BreastF_ecoli_OR$logSE<-BreastF_ecoli_OR$diflogCI/3.92
```

```
or.breastf<-rma(yi = (BreastF_ecoli_OR$logOR) , sei = (BreastF_ecoli_OR$logSE), method =  
"ML",measure = "OR")
```

```
summary(or.breastf) #moet logor en log se nog toevoegen hier, helaas
```

```
#enterobacteriae
```

```
BreastF_entero<-subset(Breast_feeding,
```

```
Breast_feeding$GroupGood=="Enterobacteriaceae(multiple or unspecified)")
```

```
BreastF_entero_OR<- subset(BreastF_entero, BreastF_entero$Method.of.estimation=="OR")
```

```

BreastF_entero_OR$logOR<-log(BreastF_entero_OR$Num_Estimate)
BreastF_entero_OR$loglb<-log(BreastF_entero_OR$Num_lb)
BreastF_entero_OR$logub<-log(BreastF_entero_OR$Num_ub)
BreastF_entero_OR$diflogCI<- BreastF_entero_OR$logub-BreastF_entero_OR$loglb
BreastF_entero_OR$logSE<-BreastF_entero_OR$diflogCI/3.92

or.breastf_entero<-rma(yi = (BreastF_entero_OR$logOR) , sei = (BreastF_entero_OR$logSE), method
= "ML",measure = "OR")

summary(or.breastf_entero)

```

#S. pneumoniae

```

BreastF_spneumo<-subset(Breast_feeding, Breast_feeding$GroupGood=="Streptococcus
pneumoniae")
BreastF_spneumo_OR<- subset(BreastF_spneumo, BreastF_spneumo$Method.of.estimation=="OR")

```

```

BreastF_spneumo_OR$logOR<-log(BreastF_spneumo_OR$Num_Estimate)
BreastF_spneumo_OR$loglb<-log(BreastF_spneumo_OR$Num_lb)
BreastF_spneumo_OR$logub<-log(BreastF_spneumo_OR$Num_ub)
BreastF_spneumo_OR$diflogCI<- BreastF_spneumo_OR$logub-BreastF_spneumo_OR$loglb
BreastF_spneumo_OR$logSE<-BreastF_spneumo_OR$diflogCI/3.92

```

```

or.breastf_spneumo<-rma(yi = (BreastF_spneumo_OR$logOR) , sei = (BreastF_spneumo_OR$logSE),
method = "ML",measure = "OR")

summary(or.breastf_spneumo) #moet logor en log se nog toevoegen hier, helaas

```

# S. Aureus

# This is for genes, so risk instead of odds method of calculation

```

breast_areus<-subset(Breast_feeding, Breast_feeding$GroupGood=="S. Aureus")
breast_areus<-subset(breast_areus, breast_areus$Method.of.estimation=="Genes")

```

```

breast_areus$id<-c(1,2)

```

```

breast_areus$Num_Estimate<- (as.numeric(gsub("[\\%,]", "", breast_areus$Estimate)))/100

```

```

breast_areus$Sample.size<-as.numeric(as.character(breast_areus$Sample.size))
breast_areus$Events<-breast_areus$Sample.size*breast_areus$Num_Estimate
breast_areus$Events_integer<-round(breast_areus$Events)
breast_areus$No_Event<-breast_areus$Sample.size-breast_areus$Events_integer

model.breast.areus<-
glmer(Events_integer/Sample.size~1+(1|id),weights=Sample.size,data=breast_areus,family="binomial")

se.logit.breast<-aureus<-sqrt(vcov(model.breast.areus))

se.logit.breast

##### Contact with infected person
# E.coli

Cont_Infeced_ecoli_Risk<-subset(Contact_with_infected,
Contact_with_infected$GroupGood=="E.Coli" &
Contact_with_infected$Method.of.estimation=="Risk")

Cont_Infeced_ecoli_Risk$id<-c(1:2)

Cont_Infeced_ecoli_Risk$Num_Estimate<- (as.numeric(gsub("[\\%,]", "",
Cont_Infeced_ecoli_Risk$Estimate)))/100

Cont_Infeced_ecoli_Risk$Sample.size<-
as.numeric(as.character(Cont_Infeced_ecoli_Risk$Sample.size))

Cont_Infeced_ecoli_Risk$Events<-
Cont_Infeced_ecoli_Risk$Sample.size*Cont_Infeced_ecoli_Risk$Num_Estimate

Cont_Infeced_ecoli_Risk$Events_integer<-round(Cont_Infeced_ecoli_Risk$Events)

Cont_Infeced_ecoli_Risk$No_Event<-Cont_Infeced_ecoli_Risk$Sample.size-
Cont_Infeced_ecoli_Risk$Events_integer

model.cont.inf.ecoli_risk<-
glmer(Events_integer/Sample.size~1+(1|id),weights=Sample.size,data=Cont_Infeced_ecoli_Risk,family="binomial")

se.logit.cont.inf.ecoli.risk<-sqrt(vcov(model.cont.inf.ecoli_risk))

```

```
#Enterobacteria
```

```
# We will not report this one, too different estimates of routes
```

```
#Cont_Infeced_entero_genes<-subset(Contact_with_infected,  
Contact_with_infected$GroupGood=="Enterobacteriaceae(multiple or unspecified)" &  
Contact_with_infected$Method.of.estimation=="Genes")
```

```
#Cont_Infeced_entero_genes$id<-c(1:4)
```

```
#Cont_Infeced_entero_genes$Num_Estimate<- (as.numeric(gsub("[\\%],"",  
Cont_Infeced_entero_genes$Estimate)))/100
```

```
#Cont_Infeced_entero_genes$Sample.size<-  
as.numeric(as.character(Cont_Infeced_entero_genes$Sample.size))
```

```
#Cont_Infeced_entero_genes$Events<-  
Cont_Infeced_entero_genes$Sample.size*Cont_Infeced_entero_genes$Num_Estimate
```

```
#Cont_Infeced_entero_genes$Events_integer<-round(Cont_Infeced_entero_genes$Events)
```

```
#Cont_Infeced_entero_genes$No_Event<-Cont_Infeced_entero_genes$Sample.size-  
Cont_Infeced_entero_genes$Events_integer
```

```
#model.cont.inf.entero<-
```

```
glmer(Events_integer/Sample.size~1+(1|id),weights=Sample.size,data=Cont_Infeced_entero_genes,  
family="binomial")
```

```
#se.logit.cont.inf.entero<-sqrt(vcov(model.cont.inf.entero))
```

```
#S. Aureus
```

```
#Cases per day (4)
```

```
Contact_with_infected_Saurues_Cases<- subset(Contact_with_infected,  
Contact_with_infected$GroupGood=="S. Aureus" &  
Contact_with_infected$Method.of.estimation=="cases per day")
```

```
#Genes (14)
```

```
Contact_with_infected_Saurues_Genes<- subset(Contact_with_infected,  
Contact_with_infected$GroupGood=="S. Aureus" &  
Contact_with_infected$Method.of.estimation=="Genes")
```

```
Contact_with_infected_Saurues_Genes$id<-c(1:2)
```

```

Contact_with_infected_Saurues_Genes$Num_Estimate<- (as.numeric(gsub("[\\%,]", "",
Contact_with_infected_Saurues_Genes$Estimate)))/100

Contact_with_infected_Saurues_Genes$Sample.size<-
as.numeric(as.character(Contact_with_infected_Saurues_Genes$Sample.size))

Contact_with_infected_Saurues_Genes$Events<-
Contact_with_infected_Saurues_Genes$Sample.size*Contact_with_infected_Saurues_Genes$Num_
Estimate

Contact_with_infected_Saurues_Genes$Events_integer<-
round(Contact_with_infected_Saurues_Genes$Events)

Contact_with_infected_Saurues_Genes$No_Event<-
Contact_with_infected_Saurues_Genes$Sample.size-
Contact_with_infected_Saurues_Genes$Events_integer

model.cont.inf.saureus_genes<-
glmer(Events_integer/Sample.size~1+(1|id),weights=Sample.size,data=Contact_with_infected_Saur
ues_Genes,family="binomial")

se.logit.cont.inf.saureus_genes<-sqrt(vcov(model.cont.inf.saureus_genes))

# Importance of Route IOR(3)

Contact_with_infected_Saurues_IOR<- subset(Contact_with_infected,
Contact_with_infected$GroupGood=="S. Aureus" &
Contact_with_infected$Method.of.estimation=="Importance of Route")

Contact_with_infected_Saurues_IOR$id<-c(1:3)

Contact_with_infected_Saurues_IOR$Num_Estimate<- (as.numeric(gsub("[\\%,]", "",
Contact_with_infected_Saurues_IOR$Estimate)))

Contact_with_infected_Saurues_IOR$Num_Estimate[2]<-
Contact_with_infected_Saurues_IOR$Num_Estimate[2]/100

Contact_with_infected_Saurues_IOR$Num_Estimate[1]<-
Contact_with_infected_Saurues_IOR$Num_Estimate[1]/100

# Missing sample sizes so pooling not possible

#OR(2)

Contact_with_infected_Saurues_OR<- subset(Contact_with_infected,
Contact_with_infected$GroupGood=="S. Aureus" &
Contact_with_infected$Method.of.estimation=="OR")

```

```

Contact_with_infected_Saurues_OR$logOR<-
log(Contact_with_infected_Saurues_OR$Num_Estimate)

Contact_with_infected_Saurues_OR$loglb<-log(Contact_with_infected_Saurues_OR$Num_lb)

Contact_with_infected_Saurues_OR$logub<-log(Contact_with_infected_Saurues_OR$Num_ub)

Contact_with_infected_Saurues_OR$diflogCI<- Contact_with_infected_Saurues_OR$logub-
Contact_with_infected_Saurues_OR$loglb

Contact_with_infected_Saurues_OR$logSE<-Contact_with_infected_Saurues_OR$diflogCI/3.92

```

```

or.cont.inf.saureus<-rma(yi = (Contact_with_infected_Saurues_OR$logOR) , sei =
(Contact_with_infected_Saurues_OR$logSE), method = "ML",measure = "OR")

summary(or.cont.inf.saureus)

```

```
#R0(11)
```

```

Contact_with_infected_Saurues_r0<- subset(Contact_with_infected,
Contact_with_infected$GroupGood=="S. Aureus" &
Contact_with_infected$Method.of.estimation=="R0")

Contact_with_infected_Saurues_r0$Estimate[9]<-0.50

Contact_with_infected_Saurues_r0$Num_Estimate[9]<-0.50

Contact_with_infected_Saurues_r0$logr0<-log(Contact_with_infected_Saurues_r0$Num_Estimate)

Contact_with_infected_Saurues_r0$loglb<-log(Contact_with_infected_Saurues_r0$Num_lb)

Contact_with_infected_Saurues_r0$logub<-log(Contact_with_infected_Saurues_r0$Num_ub)

Contact_with_infected_Saurues_r0$diflogCI<- Contact_with_infected_Saurues_r0$logub-
Contact_with_infected_Saurues_r0$loglb

Contact_with_infected_Saurues_r0$logSE<-Contact_with_infected_Saurues_r0$diflogCI/3.92

```

```

r0.cont.inf.saureus<-rma(yi = (Contact_with_infected_Saurues_r0$logr0) , sei =
(Contact_with_infected_Saurues_r0$logSE), method = "ML",measure = "OR")

summary(r0.cont.inf.saureus)

```

```
exp(r0.cont.inf.saureus$beta)
```

```
view(Contact_with_infected_Saurues_r0)
```

```
#Risk(9)
```



```
Contact_with_infected_Saurues_Risk<- subset(Contact_with_infected,  
Contact_with_infected$GroupGood=="S. Aureus" &  
Contact_with_infected$Method.of.estimation=="Risk")
```

```
Contact_with_infected_Saurues_Risk$id<-c(1:8)
```

```
Contact_with_infected_Saurues_Risk$Num_Estimate<- (as.numeric(gsub("[\\%,]", "",  
Contact_with_infected_Saurues_Risk$Estimate)))/100
```

```
Contact_with_infected_Saurues_Risk$Sample.size<-  
as.numeric(as.character(Contact_with_infected_Saurues_Risk$Sample.size))
```

```
Contact_with_infected_Saurues_Risk$Events<-  
Contact_with_infected_Saurues_Risk$Sample.size*Contact_with_infected_Saurues_Risk$Num_Esti  
mate
```

```
Contact_with_infected_Saurues_Risk$Events_integer<-  
round(Contact_with_infected_Saurues_Risk$Events)
```

```
Contact_with_infected_Saurues_Risk$No_Event<-  
Contact_with_infected_Saurues_Risk$Sample.size-  
Contact_with_infected_Saurues_Risk$Events_integer
```

```
model.cont.inf.saureus_Risk<-  
glmer(Events_integer/Sample.size~1+(1|id),weights=Sample.size,data=Contact_with_infected_Saur  
ues_Risk,family="binomial")
```

```
se.logit.cont.inf.saureus.Risk<-sqrt(vcov(model.cont.inf.saureus_Risk))
```

```
#RR(2)
```

```
Contact_with_infected_Saurues_RR<- subset(Contact_with_infected,  
Contact_with_infected$GroupGood=="S. Aureus" &  
Contact_with_infected$Method.of.estimation=="RR")
```

```
Contact_with_infected_Saurues_RR$logRR<-  
log(Contact_with_infected_Saurues_RR$Num_Estimate)
```

```
Contact_with_infected_Saurues_RR$loglb<-log(Contact_with_infected_Saurues_RR$Num_lb)
```

```
Contact_with_infected_Saurues_RR$logub<-log(Contact_with_infected_Saurues_RR$Num_ub)
```

```
Contact_with_infected_Saurues_RR$diflogCI<- Contact_with_infected_Saurues_RR$logub-  
Contact_with_infected_Saurues_RR$loglb
```

```
Contact_with_infected_Saurues_RR$logSE<-Contact_with_infected_Saurues_RR$diflogCI/3.92
```

```
rr.contact.inf.saureus<-rma(yi = (Contact_with_infected_Saurues_RR$logRR) , sei =  
(Contact_with_infected_Saurues_RR$logSE), method = "ML",measure = "RR")  
  
summary(rr.contact.inf.saureus)
```

```
#TR(4)
```

```
Contact_with_infected_Saurues_TR<- subset(Contact_with_infected,  
Contact_with_infected$GroupGood=="S. Aureus" &  
Contact_with_infected$Method.of.estimation=="transmission rate")  
  
# Cannot be pooled due to study asimilarites
```

```
# VRE 17
```

```
Contact_with_infected_VRE<-subset(Contact_with_infected,  
Contact_with_infected$GroupGood=="VRE")  
  
table(Contact_with_infected_VRE$Method.of.estimation)
```

```
#Risk
```

```
Contact_with_infected_VRE_Risk<-  
subset(Contact_with_infected_VRE,Contact_with_infected_VRE$Method.of.estimation=="Risk")
```

```
Contact_with_infected_VRE_Risk$id<-c(1:10)
```

```
Contact_with_infected_VRE_Risk$Num_Estimate<- (as.numeric(gsub("[\\%,]", "",  
Contact_with_infected_VRE_Risk$Estimate)))/100
```

```
Contact_with_infected_VRE_Risk$Sample.size<-  
as.numeric(as.character(Contact_with_infected_VRE_Risk$Sample.size))
```

```
Contact_with_infected_VRE_Risk$Events<-  
Contact_with_infected_VRE_Risk$Sample.size*Contact_with_infected_VRE_Risk$Num_Estimate
```

```
Contact_with_infected_VRE_Risk$Events_integer<-round(Contact_with_infected_VRE_Risk$Events)
```

```
Contact_with_infected_VRE_Risk$No_Event<-Contact_with_infected_VRE_Risk$Sample.size-  
Contact_with_infected_VRE_Risk$Events_integer
```

```
Contact_with_infected_VRE_Risk$No_Event[10]<-408
```

```
Contact_with_infected_VRE_Risk$Events_integer[10]<-71
```

```

model.cont.inf.vre_Risk<-
glmer(Events_integer/Sample.size~1+(1|id),weights=Sample.size,data=Contact_with_infected_VRE_
Risk,family="binomial")

se.logit.cont.inf.vre.Risk<-sqrt(vcov(model.cont.inf.saureus_Risk))

#R0
Contact_with_infected_VRE_R0<-
subset(Contact_with_infected_VRE,Contact_with_infected_VRE$Method.of.estimation=="R0")

# Ook missing sample sizes

#      A. baumannii

#OR
Contact_with_infected_Abau_OR<-subset(Contact_with_infected,
Contact_with_infected$GroupGood=="Acinetobacter baumannii" &
Contact_with_infected$Method.of.estimation=="OR")

Contact_with_infected_Abau_OR$logOR<-log(Contact_with_infected_Abau_OR$Num_Estimate)
Contact_with_infected_Abau_OR$loglb<-log(Contact_with_infected_Abau_OR$Num_lb)
Contact_with_infected_Abau_OR$logub<-log(Contact_with_infected_Abau_OR$Num_ub)
Contact_with_infected_Abau_OR$diflogCI<- Contact_with_infected_Abau_OR$logub-
Contact_with_infected_Abau_OR$loglb
Contact_with_infected_Abau_OR$logSE<-Contact_with_infected_Abau_OR$diflogCI/3.92

or.cont.inf.abbaum<-rma(yi = (Contact_with_infected_Abau_OR$logOR) , sei =
(Contact_with_infected_Abau_OR$logSE), method = "ML",measure = "OR")

summary(or.cont.inf.abbaum)

#Risk
Contact_with_infected_Abau_Risk<-subset(Contact_with_infected,
Contact_with_infected$GroupGood=="Acinetobacter baumannii" &
Contact_with_infected$Method.of.estimation=="Risk")

Contact_with_infected_Abau_Risk$id<-c(1:5)

```

```

Contact_with_infected_Abau_Risk$Num_Estimate<- (as.numeric(gsub("[\\%,]", "",
Contact_with_infected_Abau_Risk$Estimate)))/100

Contact_with_infected_Abau_Risk$Sample.size<-
as.numeric(as.character(Contact_with_infected_Abau_Risk$Sample.size))

Contact_with_infected_Abau_Risk$Events<-
Contact_with_infected_Abau_Risk$Sample.size*Contact_with_infected_Abau_Risk$Num_Estimate

Contact_with_infected_Abau_Risk$Events_integer<-
round(Contact_with_infected_Abau_Risk$Events)

Contact_with_infected_Abau_Risk$No_Event<-Contact_with_infected_Abau_Risk$Sample.size-
Contact_with_infected_Abau_Risk$Events_integer

model.cont.inf.abau_Risk<-
glmer(Events_integer/Sample.size~1+(1|id),weights=Sample.size,data=Contact_with_infected_Abau
_Risk,family="binomial")

se.logit.cont.inf.abau<-sqrt(vcov(model.cont.inf.abau_Risk))

#R0

Contact_with_infected_Abau_R0<-subset(Contact_with_infected,
Contact_with_infected$GroupGood=="Acinetobacter baumannii" &
Contact_with_infected$Method.of.estimation=="R0")

# Same study but per day and per hospital admission so not able to pool

# p. aeruginosa

# Risk (2)

Contact_with_infected_paerug_risk<-subset(Contact_with_infected,
Contact_with_infected$GroupGood=="Pseudomonas aeruginosa" &
Contact_with_infected$Method.of.estimation=="Risk")

Contact_with_infected_paerug_risk$id<-c(1,2)

Contact_with_infected_paerug_risk$Num_Estimate<- (as.numeric(gsub("[\\%,]", "",
Contact_with_infected_paerug_risk$Estimate)))/100

Contact_with_infected_paerug_risk$Sample.size<-
as.numeric(as.character(Contact_with_infected_paerug_risk$Sample.size))

Contact_with_infected_paerug_risk$Events<-
Contact_with_infected_paerug_risk$Sample.size*Contact_with_infected_paerug_risk$Num_Estimat
e

```

```
Contact_with_infected_paerug_risk$Events_integer<-  
round(Contact_with_infected_paerug_risk$Events)
```

```
Contact_with_infected_paerug_risk$No_Event<-Contact_with_infected_paerug_risk$Sample.size-  
Contact_with_infected_paerug_risk$Events_integer
```

```
model.cont.inf.pau<-  
glmer(Events_integer/Sample.size~1+(1|id),weights=Sample.size,data=Contact_with_infected_paer  
ug_risk,family="binomial")
```

```
se.logit.cont.inf.pau<-sqrt(vcov(model.cont.inf.pau))
```

```
#Genes (2)
```

```
Contact_with_infected_paerug_genes<- subset(Contact_with_infected,  
Contact_with_infected$GroupGood=="Pseudomonas aeruginosa" &  
Contact_with_infected$Method.of.estimation=="Genes")
```

```
Contact_with_infected_paerug_genes$id<-c(1:2)
```

```
Contact_with_infected_paerug_genes$Num_Estimate<- (as.numeric(gsub("[\\%,]", "",  
Contact_with_infected_paerug_genes$Estimate)))/100
```

```
Contact_with_infected_paerug_genes$Sample.size<-  
as.numeric(as.character(Contact_with_infected_paerug_genes$Sample.size))
```

```
Contact_with_infected_paerug_genes$Events<-  
Contact_with_infected_paerug_genes$Sample.size*Contact_with_infected_paerug_genes$Num_Est  
imate
```

```
Contact_with_infected_paerug_genes$Events_integer<-  
round(Contact_with_infected_paerug_genes$Events)
```

```
Contact_with_infected_paerug_genes$No_Event<-  
Contact_with_infected_paerug_genes$Sample.size-  
Contact_with_infected_paerug_genes$Events_integer
```

```
model.cont.inf.pau.genes<-  
glmer(Events_integer/Sample.size~1+(1|id),weights=Sample.size,data=Contact_with_infected_paer  
ug_genes,family="binomial")
```

```
se.logit.cont.inf.pau.genes<-sqrt(vcov(model.cont.inf.pau.genes))
```

```
#IOR (2)
```

```
Contact_with_infected_paerug_IOR<-subset(Contact_with_infected,
Contact_with_infected$GroupGood=="Pseudomonas aeruginosa" &
Contact_with_infected$Method.of.estimation=="Importance of Route")
```

```
Contact_with_infected_paerug_IOR$id<-c(1,2)
```

```
Contact_with_infected_paerug_IOR$Num_Estimate<- (as.numeric(gsub("[\\%]", "",
Contact_with_infected_paerug_IOR$Estimate)))
```

```
Contact_with_infected_paerug_IOR$Num_Estimate[1]<-
Contact_with_infected_paerug_IOR$Num_Estimate[1]/100
```

```
Contact_with_infected_paerug_IOR$Sample.size<-
as.numeric(as.character(Contact_with_infected_paerug_IOR$Sample.size))
```

```
#Sample size unknown
```

```
# S. epidermidis
```

```
#Risk(2)
```

```
Contact_with_infected_epi_risk<-subset(Contact_with_infected,
Contact_with_infected$GroupGood=="Staphylococcus epidermidis")
```

```
Contact_with_infected_epi_risk$id<-c(1,2)
```

```
Contact_with_infected_epi_risk$Num_Estimate<- (as.numeric(gsub("[\\%]", "",
Contact_with_infected_epi_risk$Estimate)))/100
```

```
Contact_with_infected_epi_risk$Sample.size<-
as.numeric(as.character(Contact_with_infected_epi_risk$Sample.size))
```

```
Contact_with_infected_epi_risk$Events<-
Contact_with_infected_epi_risk$Sample.size*Contact_with_infected_epi_risk$Num_Estimate
```

```
Contact_with_infected_epi_risk$Events_integer<-round(Contact_with_infected_epi_risk$Events)
```

```
Contact_with_infected_epi_risk$No_Event<-Contact_with_infected_epi_risk$Sample.size-
Contact_with_infected_epi_risk$Events_integer
```

```
model.cont.inf.epi.risk<-
```

```
glmer(Events_integer/Sample.size~1+(1|id),weights=Sample.size,data=Contact_with_infected_epi_risk,family="binomial")
```

```
se.logit.cont.inf.epi.risk<-sqrt(vcov(model.cont.inf.epi.risk))
```

```
##### Eating meat to human
```

```
Eating_meat_E.coli_OR<-subset(Eating_meat, Eating_meat$GroupGood=="E.Coli" &  
Eating_meat$Method.of.estation=="OR")
```

```
Eating_meat_E.coli_OR<-Eating_meat_E.coli_OR[c(1:4,6:12),]
```

```
Eating_meat_E.coli_PR<-subset(Eating_meat, Eating_meat$GroupGood=="E.Coli" &  
Eating_meat$Method.of.estation=="PR")
```

```
Eating_meat_E.coli_PR<-Eating_meat_E.coli_PR[c(1,4,6:8),]
```

```
Eating_meat_E.coli_OR$logOR<-log(Eating_meat_E.coli_OR$Num_Estimate)
```

```
Eating_meat_E.coli_OR$loglb<-log(Eating_meat_E.coli_OR$Num_lb)
```

```
Eating_meat_E.coli_OR$logub<-log(Eating_meat_E.coli_OR$Num_ub)
```

```
Eating_meat_E.coli_OR$diflogCI<- Eating_meat_E.coli_OR$logub-Eating_meat_E.coli_OR$loglb
```

```
Eating_meat_E.coli_OR$logSE<-Eating_meat_E.coli_OR$diflogCI/3.92
```

```
or.meat_ecoli<-rma(yi = (Eating_meat_E.coli_OR$logOR) , sei = (Eating_meat_E.coli_OR$logSE),  
method = "ML",measure = "OR")
```

```
summary(or.meat_ecoli)
```

```
#view(Eating_meat)
```

```
# meat stratified
```

```
whitemeat_or<-Eating_meat_E.coli_OR[c(4,8),]
```

```
redmeat_or<-Eating_meat_E.coli_OR[c(1:3,9:11),]
```

```
generalmeat_or<-Eating_meat_E.coli_OR[(5:7),]
```

```
or.white<-rma(yi = (whitemeat_or$logOR) , sei = (whitemeat_or$logSE), method = "ML",measure =  
"OR")
```

```
or.red<-rma(yi = (redmeat_or$logOR) , sei = (redmeat_or$logSE), method = "ML",measure = "OR")
```

```
or.general<-rma(yi = (generalmeat_or$logOR) , sei = (generalmeat_or$logSE), method =  
"ML",measure = "OR")
```

```
Eating_meat_E.coli_PR$logOR<-log(Eating_meat_E.coli_PR$Num_Estimate)
```

```
Eating_meat_E.coli_PR$loglb<-log(Eating_meat_E.coli_PR$Num_lb)
```

```

Eating_meat_E.coli_PR$logub<-log(Eating_meat_E.coli_PR$Num_ub)
Eating_meat_E.coli_PR$diflogCI<- Eating_meat_E.coli_PR$logub-Eating_meat_E.coli_PR$loglb
Eating_meat_E.coli_PR$logSE<-Eating_meat_E.coli_PR$diflogCI/3.92

pr.meat_ecoli<-rma(yi = (Eating_meat_E.coli_PR$logOR) , sei = (Eating_meat_E.coli_PR$logSE),
method = "ML",measure = "RR")

summary(pr.meat_ecoli)

# meat stratified

Eating_meat_E.coli_PR$Num_Estimate[1]<-1.07
red_pr<-Eating_meat_E.coli_PR[c(1,2,4,5),]

red_pr$logOR<-log(red_pr$Num_Estimate)
red_pr$loglb<-log(red_pr$Num_lb)
red_pr$logub<-log(red_pr$Num_ub)
red_pr$diflogCI<- red_pr$logub-red_pr$loglb
red_pr$logSE<-red_pr$diflogCI/3.92

pr.redmeat<-rma(yi = (red_pr$logOR) , sei = (red_pr$logSE), method = "ML",measure = "RR")

##### Family member colonised
#E.coli
#Risk
Family_member_colonised_ecoli_risk<-subset(Family_member_colonised,
Family_member_colonised$GroupGood=="E.Coli" &
Family_member_colonised$Method.of.estimation=="Risk")
Family_member_colonised_ecoli_risk$id<-c(1:2)
Family_member_colonised_ecoli_risk$Num_Estimate<- (as.numeric(gsub("[\\%]", "",
Family_member_colonised_ecoli_risk$Estimate)))/100
Family_member_colonised_ecoli_risk$Sample.size<-
as.numeric(as.character(Family_member_colonised_ecoli_risk$Sample.size))

```



```
Family_member_colonised_ecoli_risk$Events<-
Family_member_colonised_ecoli_risk$Sample.size*Family_member_colonised_ecoli_risk$Num_Esti
mate
```

```
Family_member_colonised_ecoli_risk$Events_integer<-
round(Family_member_colonised_ecoli_risk$Events)
```

```
Family_member_colonised_ecoli_risk$No_Event<-
Family_member_colonised_ecoli_risk$Sample.size-
Family_member_colonised_ecoli_risk$Events_integer
```

```
model.Family_member_colonised_ecoli_risk<-
glmer(Events_integer/Sample.size~1+(1|id),weights=Sample.size,data=Family_member_colonised_e
coli_risk,family="binomial")
```

```
se.logit.Family_member_colonised_ecoli_risk<-
sqrt(vcov(model.Family_member_colonised_ecoli_risk))
```

```
#OR
```

```
Family_member_colonised_ecoli_OR<-subset(Family_member_colonised,
Family_member_colonised$GroupGood=="E.Coli" &
Family_member_colonised$Method.of.estimation=="OR")
```

```
Family_member_colonised_ecoli_OR$logOR<-
log(Family_member_colonised_ecoli_OR$Num_Estimate)
```

```
Family_member_colonised_ecoli_OR$loglb<-log(Family_member_colonised_ecoli_OR$Num_lb)
```

```
Family_member_colonised_ecoli_OR$logub<-log(Family_member_colonised_ecoli_OR$Num_ub)
```

```
Family_member_colonised_ecoli_OR$diflogCI<- Family_member_colonised_ecoli_OR$logub-
Family_member_colonised_ecoli_OR$loglb
```

```
Family_member_colonised_ecoli_OR$logSE<-Family_member_colonised_ecoli_OR$diflogCI/3.92
```

```
or.fam.mem.col.ecoli<-rma(yi = (Family_member_colonised_ecoli_OR$logOR) , sei =
(Family_member_colonised_ecoli_OR$logSE), method = "ML",measure = "RR")
```

```
summary(or.fam.mem.col.ecoli)
```

```
# Genes
```

```
Fam_col_ecoli_genes<-subset(Family_member_colonised,
Family_member_colonised$GroupGood=="E.Coli" &
Family_member_colonised$Method.of.estimation=="Genes")
```

```

Fam_col_ecoli_genes$id<-c(1:3)

Fam_col_ecoli_genes$Num_Estimate<- (as.numeric(gsub("[\\%,]", "",
Fam_col_ecoli_genes$Estimate)))/100

Fam_col_ecoli_genes$Sample.size<-as.numeric(as.character(Fam_col_ecoli_genes$Sample.size))

Fam_col_ecoli_genes$Events<-
Fam_col_ecoli_genes$Sample.size*Fam_col_ecoli_genes$Num_Estimate

Fam_col_ecoli_genes$Events_integer<-round(Fam_col_ecoli_genes$Events)

Fam_col_ecoli_genes$No_Event<-Fam_col_ecoli_genes$Sample.size-
Fam_col_ecoli_genes$Events_integer

model.Fam_col_ecoli_genes<-
glmer(Events_integer/Sample.size~1+(1|id),weights=Sample.size,data=Fam_col_ecoli_genes,family=
"binomial")

se.logit.Fam_col_ecoli_genes<-sqrt(vcov(model.Fam_col_ecoli_genes))

#Enterococcus

Family_member_colonised_entero_PR<-subset(Family_member_colonised,
Family_member_colonised$GroupGood=="Enterobacteriaceae(multiple or unspecified)" &
Family_member_colonised$Method.of.estimation=="PR")

Family_member_colonised_entero_PR$logOR<-
log(Family_member_colonised_entero_PR$Num_Estimate)

Family_member_colonised_entero_PR$loglb<-log(Family_member_colonised_entero_PR$Num_lb)

Family_member_colonised_entero_PR$logub<-log(Family_member_colonised_entero_PR$Num_ub)

Family_member_colonised_entero_PR$diflogCI<- Family_member_colonised_entero_PR$logub-
Family_member_colonised_entero_PR$loglb

Family_member_colonised_entero_PR$logSE<-Family_member_colonised_entero_PR$diflogCI/3.92

pr.fam.mem.col.enter<-rma(yi = (Family_member_colonised_entero_PR$logOR) , sei =
(Family_member_colonised_entero_PR$logSE), method = "ML",measure = "RR")

summary(pr.fam.mem.col.enter)

# S. aureus

```

```

Family_member_colonised_saureus_OR<-subset(Family_member_colonised,
Family_member_colonised$GroupGood=="S. Aureus" &
Family_member_colonised$Method.of.estimation=="OR")

Family_member_colonised_saureus_OR<-Family_member_colonised_saureus_OR[c(1:6),]

Family_member_colonised_saureus_OR$logOR<-
log(Family_member_colonised_saureus_OR$Num_Estimate)

Family_member_colonised_saureus_OR$loglb<-
log(Family_member_colonised_saureus_OR$Num_lb)

Family_member_colonised_saureus_OR$logub<-
log(Family_member_colonised_saureus_OR$Num_ub)

Family_member_colonised_saureus_OR$diflogCI<- Family_member_colonised_saureus_OR$logub-
Family_member_colonised_saureus_OR$loglb

Family_member_colonised_saureus_OR$logSE<-
Family_member_colonised_saureus_OR$diflogCI/3.92

```

```

or.fam.mem.col.saureus<-rma(yi = (Family_member_colonised_saureus_OR$logOR) , sei =
(Family_member_colonised_saureus_OR$logSE), method = "ML",measure = "RR")

```

```
summary(or.fam.mem.col.saureus)
```

```
# Risk
```

```
fam_col_sau_risk<-subset(Family_member_colonised, Family_member_colonised$GroupGood=="S.
Aureus" & Family_member_colonised$Method.of.estimation=="Risk")
```

```
fam_col_sau_risk<-fam_col_sau_risk[c(1,3,4),]
```

```
fam_col_sau_risk$id<-c(1,3,4)
```

```
fam_col_sau_risk$Num_Estimate<- (as.numeric(gsub("[\\%,]", "", fam_col_sau_risk$Estimate)))/100
```

```
fam_col_sau_risk$Sample.size<-as.numeric(as.character(fam_col_sau_risk$Sample.size))
```

```
fam_col_sau_risk$Events<-fam_col_sau_risk$Sample.size*fam_col_sau_risk$Num_Estimate
```

```
fam_col_sau_risk$Events_integer<-round(fam_col_sau_risk$Events)
```

```
fam_col_sau_risk$No_Event<-fam_col_sau_risk$Sample.size-fam_col_sau_risk$Events_integer
```

```
model.fam_col_sau_risk<-
```

```
glmer(Events_integer/Sample.size~1+(1|id),weights=Sample.size,data=fam_col_sau_risk,family="binomial")
```

```
se.logit.fam_col_sau_risk<-sqrt(vcov(model.fam_col_sau_risk))
```

```
#view(fam_col_sau_risk)
```

```

# genes

fam_col_sau_genes<-subset(Family_member_colonised,
Family_member_colonised$GroupGood=="S. Aureus" &
Family_member_colonised$Method.of.estimation=="Genes")

fam_col_sau_genes_T<-fam_col_sau_genes[c(2,7:9),]

fam_col_sau_genes<-fam_col_sau_genes[c(1,3:6,10:11),]

fam_col_sau_genes$id<-c(1:7)

fam_col_sau_genes$Num_Estimate<- (as.numeric(gsub("[\\%]", "",
fam_col_sau_genes$Estimate)))/100

fam_col_sau_genes$Sample.size<-as.numeric(as.character(fam_col_sau_genes$Sample.size))

fam_col_sau_genes$Events<-fam_col_sau_genes$Sample.size*fam_col_sau_genes$Num_Estimate

fam_col_sau_genes$Events_integer<-round(fam_col_sau_genes$Events)

fam_col_sau_genes$No_Event<-fam_col_sau_genes$Sample.size-
fam_col_sau_genes$Events_integer

model.fam_col_sau_genes<-
glmer(Events_integer/Sample.size~1+(1|id),weights=Sample.size,data=fam_col_sau_genes,family="
binomial")

se.logit.fam_col_sau_genes<-sqrt(vcov(model.fam_col_sau_genes))

#view(fam_col_sau_genes)

fam_col_sau_genes_T$id<-c(1:4)

fam_col_sau_genes_T$Num_Estimate<- (as.numeric(gsub("[\\%]", "",
fam_col_sau_genes_T$Estimate)))/100

fam_col_sau_genes_T$Sample.size<-as.numeric(as.character(fam_col_sau_genes_T$Sample.size))

fam_col_sau_genes_T$Events<-
fam_col_sau_genes_T$Sample.size*fam_col_sau_genes_T$Num_Estimate

fam_col_sau_genes_T$Events_integer<-round(fam_col_sau_genes_T$Events)

fam_col_sau_genes_T$No_Event<-fam_col_sau_genes_T$Sample.size-
fam_col_sau_genes_T$Events_integer

```

```
model.fam_col_sau_genes_T<-  
glmer(Events_integer/Sample.size~1+(1|id),weights=Sample.size,data=fam_col_sau_genes_T,family  
="binomial")
```

```
se.logit.fam_col_sau_genes_T<-sqrt(vcov(model.fam_col_sau_genes_T))
```

```
#view(fam_col_sau_genes_T)
```

```
# p aeruginose
```

```
#Genes
```

```
Fam_with_infected_paerug_genes<- subset(Family_member_colonised,  
Family_member_colonised$GroupGood=="Pseudomonas aeruginosa" &  
Family_member_colonised$Method.of.estimation=="Genes")
```

```
Fam_with_infected_paerug_genes$id<-c(1:2)
```

```
Fam_with_infected_paerug_genes$Num_Estimate<- (as.numeric(gsub("[\\%]", "",  
Fam_with_infected_paerug_genes$Estimate)))/100
```

```
Fam_with_infected_paerug_genes$Sample.size<-  
as.numeric(as.character(Fam_with_infected_paerug_genes$Sample.size))
```

```
Fam_with_infected_paerug_genes$Events<-  
Fam_with_infected_paerug_genes$Sample.size*Fam_with_infected_paerug_genes$Num_Estimate
```

```
Fam_with_infected_paerug_genes$Events_integer<-  
round(Fam_with_infected_paerug_genes$Events)
```

```
Fam_with_infected_paerug_genes$No_Event<-Fam_with_infected_paerug_genes$Sample.size-  
Fam_with_infected_paerug_genes$Events_integer
```

```
model.fam.pau.genes<-
```

```
glmer(Events_integer/Sample.size~1+(1|id),weights=Sample.size,data=Fam_with_infected_paerug_  
genes,family="binomial")
```

```
se.logit.fam.pau.genes<-sqrt(vcov(model.fam.pau.genes))
```

```
##### Family member occupational  
exposure
```

```
Family_member_occupational_exposure_VRE<-subset(Family_member_occupational_exposure,  
Family_member_occupational_exposure$GroupGood=="VRE")
```

```
Family_member_occupational_exposure_saureus<-subset(Family_member_occupational_exposure,  
Family_member_occupational_exposure$GroupGood=="S. Aureus" &  
Family_member_occupational_exposure$Method.of.estimation=="OR")
```

```
Family_member_occupational_exposure_saureus_hospital<-  
Family_member_occupational_exposure_saureus[c(4,5),]
```

```
Family_member_occupational_exposure_saureus_farming<-  
Family_member_occupational_exposure_saureus[c(1,2,3,7),]
```

```
Family_member_occupational_exposure_saureus_farming$logOR<-  
log(Family_member_occupational_exposure_saureus_farming$Num_Estimate)
```

```
Family_member_occupational_exposure_saureus_farming$loglb<-  
log(Family_member_occupational_exposure_saureus_farming$Num_lb)
```

```
Family_member_occupational_exposure_saureus_farming$logub<-  
log(Family_member_occupational_exposure_saureus_farming$Num_ub)
```

```
Family_member_occupational_exposure_saureus_farming$diflogCI<-  
Family_member_occupational_exposure_saureus_farming$logub-  
Family_member_occupational_exposure_saureus_farming$loglb
```

```
Family_member_occupational_exposure_saureus_farming$logSE<-  
Family_member_occupational_exposure_saureus_farming$diflogCI/3.92
```

```
or.fam.occu.farm<-rma(yi = (Family_member_occupational_exposure_saureus_farming$logOR) , sei  
= (Family_member_occupational_exposure_saureus_farming$logSE), method = "ML",measure =  
"RR")
```

```
summary(or.fam.occu.farm)
```

```
Family_member_occupational_exposure_saureus_hospital$logOR<-  
log(Family_member_occupational_exposure_saureus_hospital$Num_Estimate)
```

```
Family_member_occupational_exposure_saureus_hospital$loglb<-  
log(Family_member_occupational_exposure_saureus_hospital$Num_lb)
```

```
Family_member_occupational_exposure_saureus_hospital$logub<-  
log(Family_member_occupational_exposure_saureus_hospital$Num_ub)
```

```
Family_member_occupational_exposure_saureus_hospital$diflogCI<-  
Family_member_occupational_exposure_saureus_hospital$logub-  
Family_member_occupational_exposure_saureus_hospital$loglb
```

```
Family_member_occupational_exposure_saureus_hospital$logSE<-  
Family_member_occupational_exposure_saureus_hospital$diflogCI/3.92
```

```
or.fam.occu.hosp<-rma(yi = (Family_member_occupational_exposure_saureus_hospital$logOR) , sei
= (Family_member_occupational_exposure_saureus_hospital$logSE), method = "ML",measure =
"RR")
```

```
summary(or.fam.occu.hosp)
```

```
##### Human to nearby
environement
```

```
Human_to_nearbyenv_Saureus_Risk<-subset(Human_to_nearbyenv,
Human_to_nearbyenv$GroupGood=="S. Aureus" &
Human_to_nearbyenv$Method.of.estimation=="Risk")
```

```
Human_to_nearbyenv_Saureus_Risk$id<-c(1:3)
```

```
Human_to_nearbyenv_Saureus_Risk$Num_Estimate<- (as.numeric(gsub("\\%",",","",
Human_to_nearbyenv_Saureus_Risk$Estimate)))/100
```

```
Human_to_nearbyenv_Saureus_Risk$Sample.size<-
as.numeric(as.character(Human_to_nearbyenv_Saureus_Risk$Sample.size))
```

```
Human_to_nearbyenv_Saureus_Risk$Events<-
Human_to_nearbyenv_Saureus_Risk$Sample.size*Human_to_nearbyenv_Saureus_Risk$Num_Estim
ate
```

```
Human_to_nearbyenv_Saureus_Risk$Events_integer<-
round(Human_to_nearbyenv_Saureus_Risk$Events)
```

```
Human_to_nearbyenv_Saureus_Risk$No_Event<-Human_to_nearbyenv_Saureus_Risk$Sample.size-
Human_to_nearbyenv_Saureus_Risk$Events_integer
```

```
model.humantonearenav.saureus.risk<-
glmer(Events_integer/Sample.size~1+(1|id),weights=Sample.size,data=Human_to_nearbyenv_Saure
us_Risk,family="binomial")
```

```
se.logithumantonearenav.saureus.risk<-sqrt(vcov(model.humantonearenav.saureus.risk))
```

```
Human_to_nearbyenv_VRE_Risk<-subset(Human_to_nearbyenv,
Human_to_nearbyenv$GroupGood=="VRE" &
Human_to_nearbyenv$Method.of.estimation=="Risk")
```

```
Human_to_nearbyenv_VRE_Risk<-Human_to_nearbyenv_VRE_Risk[c(1:7),]
```

```
Human_to_nearbyenv_VRE_Risk$id<-c(1:7)
```

```
Human_to_nearbyenv_VRE_Risk$Num_Estimate<- (as.numeric(gsub("\\%",",","",
Human_to_nearbyenv_VRE_Risk$Estimate)))/100
```

```

Human_to_nearbyenv_VRE_Risk$Sample.size<-
as.numeric(as.character(Human_to_nearbyenv_VRE_Risk$Sample.size))

Human_to_nearbyenv_VRE_Risk$Events<-
Human_to_nearbyenv_VRE_Risk$Sample.size*Human_to_nearbyenv_VRE_Risk$Num_Estimate

Human_to_nearbyenv_VRE_Risk$Events_integer<-round(Human_to_nearbyenv_VRE_Risk$Events)

Human_to_nearbyenv_VRE_Risk$No_Event<-Human_to_nearbyenv_VRE_Risk$Sample.size-
Human_to_nearbyenv_VRE_Risk$Events_integer

model.humantonearenav.VRE.risk<-
glmer(Events_integer/Sample.size~1+(1|id),weights=Sample.size,data=Human_to_nearbyenv_VRE_
Risk,family="binomial")

se.logithumantonearenav.VRE.risk<-sqrt(vcov(model.humantonearenav.VRE.risk))

# r0
R0_VRE_humantonrear<-subset(Human_to_nearbyenv, Human_to_nearbyenv$GroupGood=="VRE"
& Human_to_nearbyenv$Method.of.estimation=="R0")

#missing sample sizes

#risk
Human_to_nearbyenv_abau_Risk<-subset(Human_to_nearbyenv,
Human_to_nearbyenv$GroupGood=="Acinetobacter baumannii" &
Human_to_nearbyenv$Method.of.estimation=="Risk")

Human_to_nearbyenv_abau_Risk$id<-c(1:13)

Human_to_nearbyenv_abau_Risk$Num_Estimate<- (as.numeric(gsub("[\\%]", "",
Human_to_nearbyenv_abau_Risk$Estimate)))/100

Human_to_nearbyenv_abau_Risk$Sample.size<-
as.numeric(as.character(Human_to_nearbyenv_abau_Risk$Sample.size))

Human_to_nearbyenv_abau_Risk$Events<-
Human_to_nearbyenv_abau_Risk$Sample.size*Human_to_nearbyenv_abau_Risk$Num_Estimate

Human_to_nearbyenv_abau_Risk$Events_integer<-
round(Human_to_nearbyenv_abau_Risk$Events)

Human_to_nearbyenv_abau_Risk$No_Event<-Human_to_nearbyenv_abau_Risk$Sample.size-
Human_to_nearbyenv_abau_Risk$Events_integer

```



```
model.humantonearenav.abau.risk<-
glmer(Events_integer/Sample.size~1+(1|id),weights=Sample.size,data=Human_to_nearbyenv_abau
_Risk,family="binomial")
se.logithumantonearenav.abau.risk<-sqrt(vcov(model.humantonearenav.abau.risk))
```

```
Human_to_nearbyenv_ocalco_Risk<-subset(Human_to_nearbyenv,
Human_to_nearbyenv$GroupGood=="Acinetobacter calcoaceticus" &
Human_to_nearbyenv$Method.of.estimation=="Risk")
```

```
Human_to_nearbyenv_ocalco_Risk$id<-c(1:2)
```

```
Human_to_nearbyenv_ocalco_Risk$Num_Estimate<- (as.numeric(gsub("[\\%]", "",
Human_to_nearbyenv_ocalco_Risk$Estimate)))/100
```

```
Human_to_nearbyenv_ocalco_Risk$Sample.size<-
as.numeric(as.character(Human_to_nearbyenv_ocalco_Risk$Sample.size))
```

```
Human_to_nearbyenv_ocalco_Risk$Events<-
Human_to_nearbyenv_ocalco_Risk$Sample.size*Human_to_nearbyenv_ocalco_Risk$Num_Estimate
```

```
Human_to_nearbyenv_ocalco_Risk$Events_integer<-
round(Human_to_nearbyenv_ocalco_Risk$Events)
```

```
Human_to_nearbyenv_ocalco_Risk$No_Event<-Human_to_nearbyenv_ocalco_Risk$Sample.size-
Human_to_nearbyenv_ocalco_Risk$Events_integer
```

```
model.humantonearenav.ocalco.risk<-
glmer(Events_integer/Sample.size~1+(1|id),weights=Sample.size,data=Human_to_nearbyenv_ocalc
o_Risk,family="binomial")
se.logithumantonearenav.ocalco.risk<-sqrt(vcov(model.humantonearenav.ocalco.risk))
```

```
##### Livestock to drinking water
```

```
Livestock_to_drinking_water_pig<-subset(Livestock_to_drinking_water,
Livestock_to_drinking_water$Animal.involved.in.route=="pig")
```

```
Livestock_to_drinking_water_poultry<-subset(Livestock_to_drinking_water,
Livestock_to_drinking_water$Animal.involved.in.route=="poultry")
```

```
Livestock_to_drinking_water_cattle<-subset(Livestock_to_drinking_water,
Livestock_to_drinking_water$Animal.involved.in.route=="cattle" |
Livestock_to_drinking_water$Animal.involved.in.route=="catle")
```

```
Livestock_to_drinking_water_pig$logOR<-log(Livestock_to_drinking_water_pig$Num_Estimate)
```

```
Livestock_to_drinking_water_pig$loglb<-log(Livestock_to_drinking_water_pig$Num_lb)
```

```
Livestock_to_drinking_water_pig$logub<-log(Livestock_to_drinking_water_pig$Num_ub)
```

```
Livestock_to_drinking_water_pig$diflogCI<-Livestock_to_drinking_water_pig$logub-  
Livestock_to_drinking_water_pig$loglb
```

```
Livestock_to_drinking_water_pig$logSE<-Livestock_to_drinking_water_pig$diflogCI/3.92
```

```
or.livedrink_pig<-rma(yi = (Livestock_to_drinking_water_pig$logOR) , sei =  
(Livestock_to_drinking_water_pig$logSE), method = "ML",measure = "RR")
```

```
summary(or.livedrink_pig)
```

```
Livestock_to_drinking_water_poultry$logOR<-  
log(Livestock_to_drinking_water_poultry$Num_Estimate)
```

```
Livestock_to_drinking_water_poultry$loglb<-log(Livestock_to_drinking_water_poultry$Num_lb)
```

```
Livestock_to_drinking_water_poultry$logub<-log(Livestock_to_drinking_water_poultry$Num_ub)
```

```
Livestock_to_drinking_water_poultry$diflogCI<- Livestock_to_drinking_water_poultry$logub-  
Livestock_to_drinking_water_poultry$loglb
```

```
Livestock_to_drinking_water_poultry$logSE<-Livestock_to_drinking_water_poultry$diflogCI/3.92
```

```
or.livedrink_poultry<-rma(yi = (Livestock_to_drinking_water_poultry$logOR) , sei =  
(Livestock_to_drinking_water_poultry$logSE), method = "ML",measure = "RR")
```

```
summary(or.livedrink_poultry)
```

```
Livestock_to_drinking_water_cattle$logOR<-  
log(Livestock_to_drinking_water_cattle$Num_Estimate)
```

```
Livestock_to_drinking_water_cattle$loglb<-log(Livestock_to_drinking_water_cattle$Num_lb)
```

```
Livestock_to_drinking_water_cattle$logub<-log(Livestock_to_drinking_water_cattle$Num_ub)
```

```
Livestock_to_drinking_water_cattle$diflogCI<- Livestock_to_drinking_water_cattle$logub-  
Livestock_to_drinking_water_cattle$loglb
```

```
Livestock_to_drinking_water_cattle$logSE<-Livestock_to_drinking_water_cattle$diflogCI/3.92
```

```
or.livedrink_cattle<-rma(yi = (Livestock_to_drinking_water_cattle$logOR) , sei =  
(Livestock_to_drinking_water_cattle$logSE), method = "ML",measure = "RR")
```

```
summary(or.livedrink_cattle)
```

```
#####Mother to child
```

```
Mother_to_child_entero_Risk<-subset(Mother_to_child,  
Mother_to_child$GroupGood=="Enterobacteriaceae(multiple or unspecified)" &  
Mother_to_child$Method.of.estimation=="Risk")
```

```
#don't pool because not similar
```

```
Mother_to_child_Saureus_Risk<-subset(Mother_to_child, Mother_to_child$GroupGood=="S.  
Aureus" & Mother_to_child$Method.of.estimation=="Risk")
```

```
Mother_to_child_Saureus_Risk$id<-c(1:3)
```

```
Mother_to_child_Saureus_Risk$Num_Estimate<- (as.numeric(gsub("[\\%,]", "",  
Mother_to_child_Saureus_Risk$Estimate)))/100
```

```
Mother_to_child_Saureus_Risk$Sample.size<-as.numeric(as.character(  
Mother_to_child_Saureus_Risk$Sample.size))
```

```
Mother_to_child_Saureus_Risk$Events<- Mother_to_child_Saureus_Risk$Sample.size*  
Mother_to_child_Saureus_Risk$Num_Estimate
```

```
Mother_to_child_Saureus_Risk$Events_integer<-round( Mother_to_child_Saureus_Risk$Events)
```

```
Mother_to_child_Saureus_Risk$No_Event<- Mother_to_child_Saureus_Risk$Sample.size-  
Mother_to_child_Saureus_Risk$Events_integer
```

```
model.mother.to.child.risk<-glmer(Events_integer/Sample.size~1+(1|id),weights=Sample.size,data=  
Mother_to_child_Saureus_Risk,family="binomial")
```

```
se.logit.mother.to.child<-sqrt(vcov(model.mother.to.child.risk))
```

```
Mother_to_child_Aureus_OR<-subset(Mother_to_child, Mother_to_child$GroupGood=="S.  
Aureus" & Mother_to_child$Method.of.estimation=="OR")
```

```
Mother_to_child_Aureus_OR$logOR<-log(Mother_to_child_Aureus_OR$Num_Estimate)
```

```
Mother_to_child_Aureus_OR$loglb<-log(Mother_to_child_Aureus_OR$Num_lb)
```

```
Mother_to_child_Aureus_OR$logub<-log(Mother_to_child_Aureus_OR$Num_ub)
```

```
Mother_to_child_Aureus_OR$diflogCI<- Mother_to_child_Aureus_OR$logub-  
Mother_to_child_Aureus_OR$loglb
```

```
Mother_to_child_Aureus_OR$logSE<-Mother_to_child_Aureus_OR$diflogCI/3.92
```

```
or.mother.to.child<-rma(yi = (Mother_to_child_Aaureus_OR$logOR) , sei =
(Mother_to_child_Aaureus_OR$logSE), method = "ML",measure = "RR")
summary(or.livedrink_cattle)
```

```
# group B
```

```
Mother_to_child_groupB_Risk<-subset(Mother_to_child, Mother_to_child$GroupGood=="Group B
streptococci" & Mother_to_child$Method.of.estimation=="Risk")
```

```
Mother_to_child_groupB_Risk<-
Mother_to_child_groupB_Risk[!(Mother_to_child_groupB_Risk$Author=="Facchinetti F"),]
```

```
#The study of Facchinetti et al is not comparable to the other studies and therefore not included in
the meta-analysis
```

```
Mother_to_child_groupB_Risk$id<-c(1:5)
```

```
Mother_to_child_groupB_Risk$Num_Estimate<- (as.numeric(gsub("[\\%,]", "",
Mother_to_child_groupB_Risk$Estimate)))/100
```

```
Mother_to_child_groupB_Risk$Sample.size<-as.numeric(as.character(
Mother_to_child_groupB_Risk$Sample.size))
```

```
Mother_to_child_groupB_Risk$Events<- Mother_to_child_groupB_Risk$Sample.size*
Mother_to_child_groupB_Risk$Num_Estimate
```

```
Mother_to_child_groupB_Risk$Events_integer<-round( Mother_to_child_groupB_Risk$Events)
```

```
Mother_to_child_groupB_Risk$No_Event<- Mother_to_child_groupB_Risk$Sample.size-
Mother_to_child_groupB_Risk$Events_integer
```

```
model.mother.to.child.risk.GB<-
glmer(Events_integer/Sample.size~1+(1|id),weights=Sample.size,data=
Mother_to_child_groupB_Risk,family="binomial")
```

```
se.logit.mother.to.child.GB<-sqrt(vcov(model.mother.to.child.risk.GB))
```

```
##### Occupational Exposure
```

```
#. E. coli
```

```
Occupational_Exposure_E.coli_OR_poultry<-subset(Occupational_Exposure,
Occupational_Exposure$GroupGood=="E.Coli" &
Occupational_Exposure$Method.of.estimation=="OR"
&Occupational_Exposure$Animal.involved.in.route=="poultry")
```

```
Occupational_Exposure_E.coli_OR_poultry$logOR<-
log(Occupational_Exposure_E.coli_OR_poultry$Num_Estimate)

Occupational_Exposure_E.coli_OR_poultry$loglb<-
log(Occupational_Exposure_E.coli_OR_poultry$Num_lb)

Occupational_Exposure_E.coli_OR_poultry$logub<-
log(Occupational_Exposure_E.coli_OR_poultry$Num_ub)

Occupational_Exposure_E.coli_OR_poultry$diflogCI<-
Occupational_Exposure_E.coli_OR_poultry$logub-Occupational_Exposure_E.coli_OR_poultry$loglb

Occupational_Exposure_E.coli_OR_poultry$logSE<-
Occupational_Exposure_E.coli_OR_poultry$diflogCI/3.92
```

```
or.occu.exp.poultry<-rma(yi = (Occupational_Exposure_E.coli_OR_poultry$logOR) , sei =
(Occupational_Exposure_E.coli_OR_poultry$logSE), method = "ML",measure = "RR")

summary(or.occu.exp.poultry)
```

```
Occupational_Exposure_E.coli_PR<-subset(Occupational_Exposure,
Occupational_Exposure$GroupGood=="E.Coli" &
Occupational_Exposure$Method.of.estimation=="PR")

Occupational_Exposure_E.coli_PR<-Occupational_Exposure_E.coli_PR[c(1,2),]
```

```
Occupational_Exposure_E.coli_Risk<-subset(Occupational_Exposure,
Occupational_Exposure$GroupGood=="E.Coli" &
Occupational_Exposure$Method.of.estimation=="Risk")

#uninfected and infected are from the same study as the other poultry, they contain the same
people so cannot be pooled
```

```
Occupational_Exposure_E.coli_Genes<-subset(Occupational_Exposure,
Occupational_Exposure$GroupGood=="E.Coli" &
Occupational_Exposure$Method.of.estimation=="Genes")

#Risk & Genes cannot be pooled due to different animals/occupation exposures
```

```
# Enterobacteriae
```

```
Occupational_Exposure_Enterobacteriae<-subset(Occupational_Exposure,
Occupational_Exposure$GroupGood=="Enterobacteriaceae(multiple or unspecified)" &
Occupational_Exposure$Method.of.estimation=="OR")
```

#The meta-analysis below could no longer be performed. The study of Dohmen has a reference category that also has occupational exposure to pigs. This article is mentioned in the review as more hours indicate more colonization.

```
#Occupational_Exposure_Enteror_pig<-Occupational_Exposure_Enteror_OR[c(1,2),]
#Occupational_Exposure_Enteror_pig$logOR<-
log(Occupational_Exposure_Enteror_pig$Num_Estimate)
#Occupational_Exposure_Enteror_pig$loglb<-
log(Occupational_Exposure_Enteror_pig$Num_lb)
#Occupational_Exposure_Enteror_pig$logub<-
log(Occupational_Exposure_Enteror_pig$Num_ub)
#Occupational_Exposure_Enteror_pig$diflogCI<- Occupational_Exposure_Enteror_pig$logub-
Occupational_Exposure_Enteror_pig$loglb
#Occupational_Exposure_Enteror_pig$logSE<-
Occupational_Exposure_Enteror_pig$diflogCI/3.92

#or.occu.exp.pig.entero<-rma(yi = (Occupational_Exposure_Enteror_pig$logOR) , sei =
(Occupational_Exposure_Enteror_pig$logSE), method = "ML",measure = "RR")

#summary(or.occu.exp.pig.entero)
```

```
Occupational_Exposure_Enteror_Risk<-subset(Occupational_Exposure,
Occupational_Exposure$GroupGood=="Enterobacteriaceae(multiple or unspecified)" &
Occupational_Exposure$Method.of.estimation=="Risk")
```

```
Occupational_Exposure_Enteror_Risk_pig<-Occupational_Exposure_Enteror_Risk[c(1:3),]
```

```
Occupational_Exposure_Enteror_Risk_pig$id<-c(1:3)
```

```
Occupational_Exposure_Enteror_Risk_pig$Num_Estimate<- (as.numeric(gsub("[\\%]", "",
Occupational_Exposure_Enteror_Risk_pig$Estimate)))/100
```

```
Occupational_Exposure_Enteror_Risk_pig$Sample.size<-as.numeric(as.character(
Occupational_Exposure_Enteror_Risk_pig$Sample.size))
```

```
Occupational_Exposure_Enteror_Risk_pig$Events<-
Occupational_Exposure_Enteror_Risk_pig$Sample.size*
Occupational_Exposure_Enteror_Risk_pig$Num_Estimate
```

```
Occupational_Exposure_Enteror_Risk_pig$Events_integer<-round(
Occupational_Exposure_Enteror_Risk_pig$Events)
```

```
Occupational_Exposure_Enteror_Risk_pig$No_Event<-
Occupational_Exposure_Enteror_Risk_pig$Sample.size-
Occupational_Exposure_Enteror_Risk_pig$Events_integer
```

```
model.occu.exp.pig.entero<-glmer(Events_integer/Sample.size~1+(1|id),weights=Sample.size,data=Occupational_Exposure_Entero_Risk_pig,family="binomial")
```

```
se.logit.occu.exp.pig.entero<-sqrt(vcov(model.occu.exp.pig.entero))
```

```
Occupational_Exposure_Entero_genes<-subset(Occupational_Exposure,  
Occupational_Exposure$GroupGood=="Enterobacteriaceae(multiple or unspecified)" &  
Occupational_Exposure$Method.of.estimation=="Genes")
```

```
# S. Aureus
```

```
#OR
```

```
Occupational_Exposure_SAureus_OR<-subset(Occupational_Exposure,  
Occupational_Exposure$GroupGood=="S. Aureus" &  
Occupational_Exposure$Method.of.estimation=="OR")
```

```
Occupational_Exposure_SAureus_OR_pig<-subset(Occupational_Exposure,  
Occupational_Exposure$GroupGood=="S. Aureus" &  
Occupational_Exposure$Method.of.estimation=="OR" &  
Occupational_Exposure$Animal.involved.in.route=="pig")
```

```
Occupational_Exposure_SAureus_OR_pig<-Occupational_Exposure_SAureus_OR_pig[c(1:9,13:17),]  
#10-12 are excluded because their reference category also has occupational pig exposure
```

```
Occupational_Exposure_SAureus_OR_pig$logOR<-  
log(Occupational_Exposure_SAureus_OR_pig$Num_Estimate)
```

```
Occupational_Exposure_SAureus_OR_pig$loglb<-  
log(Occupational_Exposure_SAureus_OR_pig$Num_lb)
```

```
Occupational_Exposure_SAureus_OR_pig$logub<-  
log(Occupational_Exposure_SAureus_OR_pig$Num_ub)
```

```
Occupational_Exposure_SAureus_OR_pig$diflogCI<-  
Occupational_Exposure_SAureus_OR_pig$logub-Occupational_Exposure_SAureus_OR_pig$loglb
```

```
Occupational_Exposure_SAureus_OR_pig$logSE<-  
Occupational_Exposure_SAureus_OR_pig$diflogCI/3.92
```

```
or.occu.exp.pig.saureus<-rma(yi = (Occupational_Exposure_SAureus_OR_pig$logOR) , sei =  
(Occupational_Exposure_SAureus_OR_pig$logSE), method = "ML",measure = "RR")
```

```
summary(or.occu.exp.pig.saureus)
```

```
Occupational_Exposure_SAureus_OR_cattle<-subset(Occupational_Exposure,  
Occupational_Exposure$GroupGood=="S. Aureus" &  
Occupational_Exposure$Method.of.estimation=="OR" &  
Occupational_Exposure$Animal.involved.in.route=="catle")
```

```
Occupational_Exposure_SAureus_OR_cattle$logOR<-  
log(Occupational_Exposure_SAureus_OR_cattle$Num_Estimate)
```

```
Occupational_Exposure_SAureus_OR_cattle$loglb<-  
log(Occupational_Exposure_SAureus_OR_cattle$Num_lb)
```

```
Occupational_Exposure_SAureus_OR_cattle$logub<-  
log(Occupational_Exposure_SAureus_OR_cattle$Num_ub)
```

```
Occupational_Exposure_SAureus_OR_cattle$diflogCI<-  
Occupational_Exposure_SAureus_OR_cattle$logub-  
Occupational_Exposure_SAureus_OR_cattle$loglb
```

```
Occupational_Exposure_SAureus_OR_cattle$logSE<-  
Occupational_Exposure_SAureus_OR_cattle$diflogCI/3.92
```

```
or.occu.exp.cattle.saureus<-rma(yi = (Occupational_Exposure_SAureus_OR_cattle$logOR) , sei =  
(Occupational_Exposure_SAureus_OR_cattle$logSE), method = "ML",measure = "RR")
```

```
summary(or.occu.exp.cattle.saureus)
```

```
#No longer included because reference group also has occupational exposure to poultry
```

```
#Occupational_Exposure_SAureus_OR_poultry<-subset(Occupational_Exposure,  
Occupational_Exposure$GroupGood=="S. Aureus" &  
Occupational_Exposure$Method.of.estimation=="OR" &  
Occupational_Exposure$Animal.involved.in.route=="poultry")
```

```
#Occupational_Exposure_SAureus_OR_poultry$logOR<-  
log(Occupational_Exposure_SAureus_OR_poultry$Num_Estimate)
```

```
#Occupational_Exposure_SAureus_OR_poultry$loglb<-  
log(Occupational_Exposure_SAureus_OR_poultry$Num_lb)
```

```
#Occupational_Exposure_SAureus_OR_poultry$logub<-  
log(Occupational_Exposure_SAureus_OR_poultry$Num_ub)
```

```
#Occupational_Exposure_SAureus_OR_poultry$diflogCI<-  
Occupational_Exposure_SAureus_OR_poultry$logub-  
Occupational_Exposure_SAureus_OR_poultry$loglb
```

```
#Occupational_Exposure_SAureus_OR_poultry$logSE<-  
Occupational_Exposure_SAureus_OR_poultry$diflogCI/3.92
```



```
#or.occu.exp.poultry.saureus<-rma(yi = (Occupational_Exposure_SAureus_OR_poultry$logOR) , sei =  
(Occupational_Exposure_SAureus_OR_poultry$logSE), method = "ML",measure = "RR")
```

```
#summary(or.occu.exp.poultry.saureus)
```

```
Occupational_Exposure_SAureus_OR_vets<-Occupational_Exposure_SAureus_OR[c(8,9,22,23),]
```

```
Occupational_Exposure_SAureus_OR_vets$logOR<-  
log(Occupational_Exposure_SAureus_OR_vets$Num_Estimate)
```

```
Occupational_Exposure_SAureus_OR_vets$loglb<-  
log(Occupational_Exposure_SAureus_OR_vets$Num_lb)
```

```
Occupational_Exposure_SAureus_OR_vets$logub<-  
log(Occupational_Exposure_SAureus_OR_vets$Num_ub)
```

```
Occupational_Exposure_SAureus_OR_vets$diflogCI<-  
Occupational_Exposure_SAureus_OR_vets$logub-Occupational_Exposure_SAureus_OR_vets$loglb
```

```
Occupational_Exposure_SAureus_OR_vets$logSE<-  
Occupational_Exposure_SAureus_OR_vets$diflogCI/3.92
```

```
or.occu.exp.vets.sarues<-rma(yi = (Occupational_Exposure_SAureus_OR_vets$logOR) , sei =  
(Occupational_Exposure_SAureus_OR_vets$logSE), method = "ML",measure = "RR")
```

```
summary(or.occu.exp.poultry)
```

```
Occupational_Exposure_SAureus_Risk<-subset(Occupational_Exposure,  
Occupational_Exposure$GroupGood=="S. Aureus" &  
Occupational_Exposure$Method.of.estimation=="Risk")
```

```
#PR
```

```
Occupational_Exposure_SAureus_PR<-subset(Occupational_Exposure,  
Occupational_Exposure$GroupGood=="S. Aureus" &  
Occupational_Exposure$Method.of.estimation=="PR")
```

```
Occupational_Exposure_SAureus_PR_poultry<-subset(Occupational_Exposure,  
Occupational_Exposure$GroupGood=="S. Aureus" &  
Occupational_Exposure$Method.of.estimation=="PR" &  
Occupational_Exposure$Animal.involved.in.route=="poultry")
```

```
Occupational_Exposure_SAureus_PR_poultry$logOR<-  
log(Occupational_Exposure_SAureus_PR_poultry$Num_Estimate)
```

```
Occupational_Exposure_SAureus_PR_poultry$loglb<-  
log(Occupational_Exposure_SAureus_PR_poultry$Num_lb)
```

```
Occupational_Exposure_SAureus_PR_poultry$logub<-  
log(Occupational_Exposure_SAureus_PR_poultry$Num_ub)
```

```
Occupational_Exposure_SAureus_PR_poultry$diflogCI<-  
Occupational_Exposure_SAureus_PR_poultry$logub-  
Occupational_Exposure_SAureus_PR_poultry$loglb
```

```
Occupational_Exposure_SAureus_PR_poultry$logSE<-  
Occupational_Exposure_SAureus_PR_poultry$diflogCI/3.92
```

```
pr.occu.exp.saureus.poultry<-rma(yi = (Occupational_Exposure_SAureus_PR_poultry$logOR) , sei =  
(Occupational_Exposure_SAureus_PR_poultry$logSE), method = "ML",measure = "RR")
```

```
summary(pr.occu.exp.saureus.poultry)
```

```
Occupational_Exposure_SAureus_PR_Pig<-subset(Occupational_Exposure,  
Occupational_Exposure$GroupGood=="S. Aureus" &  
Occupational_Exposure$Method.of.estimation=="PR" &  
Occupational_Exposure$Animal.involved.in.route=="pig"  
|Occupational_Exposure$Animal.involved.in.route=="hog" |Occupational_Exposure$Animal.involved  
.in.route=="swine")
```

```
Occupational_Exposure_SAureus_PR_Pig$logOR<-  
log(Occupational_Exposure_SAureus_PR_Pig$Num_Estimate)
```

```
Occupational_Exposure_SAureus_PR_Pig$loglb<-  
log(Occupational_Exposure_SAureus_PR_Pig$Num_lb)
```

```
Occupational_Exposure_SAureus_PR_Pig$logub<-  
log(Occupational_Exposure_SAureus_PR_Pig$Num_ub)
```

```
Occupational_Exposure_SAureus_PR_Pig$diflogCI<-  
Occupational_Exposure_SAureus_PR_Pig$logub-Occupational_Exposure_SAureus_PR_Pig$loglb
```

```
Occupational_Exposure_SAureus_PR_Pig$logSE<-  
Occupational_Exposure_SAureus_PR_Pig$diflogCI/3.92
```

```
pr.occu.exp.saureus.pig<-rma(yi = (Occupational_Exposure_SAureus_PR_Pig$logOR) , sei =  
(Occupational_Exposure_SAureus_PR_Pig$logSE), method = "ML",measure = "RR")
```

```
summary(pr.occu.exp.saureus.pig)
```

```
#Risk
```

```
Occupational_Exposure_SAureus_Risk<-subset(Occupational_Exposure,  
Occupational_Exposure$GroupGood=="S. Aureus" &  
Occupational_Exposure$Method.of.estimation=="Risk")
```

```
Occupational_Exposure_SAureus_Risk$Animal.involved.in.route[17]<-"pig"
```

```
Occupational_Exposure_SAureus_Risk_pig<-subset(Occupational_Exposure_SAureus_Risk,  
Occupational_Exposure_SAureus_Risk$Animal.involved.in.route=="pig")
```

```
Occupational_Exposure_SAureus_Risk_pig<-  
Occupational_Exposure_SAureus_Risk_pig[!(Occupational_Exposure_SAureus_Risk_pig$Author=="  
Witte"),]
```

```
# The study by Witte et al is not included in the meta-analysis as the method of risk assessment was  
different then the other studies, these were collonise farmers which were then asked it they saw  
pigs
```

```
Occupational_Exposure_SAureus_Risk_pig$id<-c(1:9)
```

```
Occupational_Exposure_SAureus_Risk_pig$Num_Estimate<- (as.numeric(gsub("[\\%,]", "",  
Occupational_Exposure_SAureus_Risk_pig$Estimate)))/100
```

```
Occupational_Exposure_SAureus_Risk_pig$Sample.size<-as.numeric(as.character(  
Occupational_Exposure_SAureus_Risk_pig$Sample.size))
```

```
Occupational_Exposure_SAureus_Risk_pig$Events<-  
Occupational_Exposure_SAureus_Risk_pig$Sample.size*  
Occupational_Exposure_SAureus_Risk_pig$Num_Estimate
```

```
Occupational_Exposure_SAureus_Risk_pig$Events_integer<-round(  
Occupational_Exposure_SAureus_Risk_pig$Events)
```

```
Occupational_Exposure_SAureus_Risk_pig$No_Event<-  
Occupational_Exposure_SAureus_Risk_pig$Sample.size-  
Occupational_Exposure_SAureus_Risk_pig$Events_integer
```

```
model.occu.exp.pig.saureus<-  
glmer(Events_integer/Sample.size~1+(1|id),weights=Sample.size,data=  
Occupational_Exposure_SAureus_Risk_pig,family="binomial")
```

```
se.logit.occu.exp.pig.saureus<-sqrt(vcov(model.occu.exp.pig.saureus))
```

```
Occupational_Exposure_SAureus_Risk_vet<-Occupational_Exposure_SAureus_Risk[c(8,10:13),]
```

```

Occupational_Exposure_SAureus_Risk_vet$id<-c(1:5)

Occupational_Exposure_SAureus_Risk_vet$Num_Estimate<- (as.numeric(gsub("[\\%]", "",
Occupational_Exposure_SAureus_Risk_vet$Estimate)))/100

Occupational_Exposure_SAureus_Risk_vet$Sample.size<-as.numeric(as.character(
Occupational_Exposure_SAureus_Risk_vet$Sample.size))

Occupational_Exposure_SAureus_Risk_vet$Events<-
Occupational_Exposure_SAureus_Risk_vet$Sample.size*
Occupational_Exposure_SAureus_Risk_vet$Num_Estimate

Occupational_Exposure_SAureus_Risk_vet$Events_integer<-round(
Occupational_Exposure_SAureus_Risk_vet$Events)

Occupational_Exposure_SAureus_Risk_vet$No_Event<-
Occupational_Exposure_SAureus_Risk_vet$Sample.size-
Occupational_Exposure_SAureus_Risk_vet$Events_integer

model.occu.exp.vet.risk<-glmer(Events_integer/Sample.size~1+(1|id),weights=Sample.size,data=
Occupational_Exposure_SAureus_Risk_vet,family="binomial")

se.logit.occu.exp.vet.risk<-sqrt(vcov(model.occu.exp.vet.risk))

#Genes

Occupational_Exposure_SAureus_Genes<-subset(Occupational_Exposure,
Occupational_Exposure$GroupGood=="S. Aureus" &
Occupational_Exposure$Method.of.estimation=="Genes")

Occupational_Exposure_SAureus_Genes_pig<-subset(Occupational_Exposure,
Occupational_Exposure$GroupGood=="S. Aureus" &
Occupational_Exposure$Method.of.estimation=="Genes" &
Occupational_Exposure$Animal.involved.in.route=="pig")

Occupational_Exposure_SAureus_Genes_pig$id<-c(1:4)

Occupational_Exposure_SAureus_Genes_pig$Num_Estimate<- (as.numeric(gsub("[\\%]", "",
Occupational_Exposure_SAureus_Genes_pig$Estimate)))/100

Occupational_Exposure_SAureus_Genes_pig$Sample.size<-as.numeric(as.character(
Occupational_Exposure_SAureus_Genes_pig$Sample.size))

Occupational_Exposure_SAureus_Genes_pig$Events<-
Occupational_Exposure_SAureus_Genes_pig$Sample.size*
Occupational_Exposure_SAureus_Genes_pig$Num_Estimate

Occupational_Exposure_SAureus_Genes_pig$Events_integer<-round(
Occupational_Exposure_SAureus_Genes_pig$Events)

Occupational_Exposure_SAureus_Genes_pig$No_Event<-
Occupational_Exposure_SAureus_Genes_pig$Sample.size-
Occupational_Exposure_SAureus_Genes_pig$Events_integer

```

```
model.occu.exp.genes.saureus.pig<-
glmer(Events_integer/Sample.size~1+(1|id),weights=Sample.size,data=
Occupational_Exposure_SAureus_Genes_pig,family="binomial")

se.logit.occu.exp.genes.saureus.pig<-sqrt(vcov(model.occu.exp.genes.saureus.pig))
```

```
# VRE
```

```
Occupational_Exposure_VRE<-subset(Occupational_Exposure,
Occupational_Exposure$GroupGood=="VRE")
```

```
#Staphylococci
```

```
Occupational_Exposure_Staph<-subset(Occupational_Exposure,
Occupational_Exposure$GroupGood=="Staphylococci")
```

```
Occupational_Exposure_Staph_pig_risk<-subset(Occupational_Exposure,
Occupational_Exposure$GroupGood=="Staphylococci" &
Occupational_Exposure$Method.of.estimation=="Risk" &
Occupational_Exposure$Animal.involved.in.route=="pig")
```

```
Occupational_Exposure_Staph_pig_risk$id<-c(1:3)
```

```
Occupational_Exposure_Staph_pig_risk$Num_Estimate<- (as.numeric(gsub("[\\%,]", "",
Occupational_Exposure_Staph_pig_risk$Estimate)))/100
```

```
Occupational_Exposure_Staph_pig_risk$Sample.size<-as.numeric(as.character(
Occupational_Exposure_Staph_pig_risk$Sample.size))
```

```
Occupational_Exposure_Staph_pig_risk$Events<-
Occupational_Exposure_Staph_pig_risk$Sample.size*
Occupational_Exposure_Staph_pig_risk$Num_Estimate
```

```
Occupational_Exposure_Staph_pig_risk$Events_integer<-round(
Occupational_Exposure_Staph_pig_risk$Events)
```

```
Occupational_Exposure_Staph_pig_risk$No_Event<-
Occupational_Exposure_Staph_pig_risk$Sample.size-
Occupational_Exposure_Staph_pig_risk$Events_integer
```

```
model.occu.exp.staph.risk.pig<-
glmer(Events_integer/Sample.size~1+(1|id),weights=Sample.size,data=
Occupational_Exposure_Staph_pig_risk,family="binomial")
```

```
se.logit.occu.exp.staph.risk.pig<-sqrt(vcov(model.occu.exp.staph.risk.pig))
```

```
Occupational_Exposure_Staph_pig_PR<-subset(Occupational_Exposure,  
Occupational_Exposure$GroupGood=="Staphylococci"&  
Occupational_Exposure$Method.of.estimation=="PR" &  
Occupational_Exposure$Animal.involved.in.route=="pig")
```

```
# This one is no longer included as the reference group also has occupational exposure and then only  
1 study remains
```

```
#Occupational_Exposure_Staph_pig_PR$logOR<-  
log(Occupational_Exposure_Staph_pig_PR$Num_Estimate)
```

```
#Occupational_Exposure_Staph_pig_PR$loglb<-log(Occupational_Exposure_Staph_pig_PR$Num_lb)
```

```
#Occupational_Exposure_Staph_pig_PR$logub<-  
log(Occupational_Exposure_Staph_pig_PR$Num_ub)
```

```
#Occupational_Exposure_Staph_pig_PR$diflogCI<- Occupational_Exposure_Staph_pig_PR$logub-  
Occupational_Exposure_Staph_pig_PR$loglb
```

```
#Occupational_Exposure_Staph_pig_PR$logSE<-  
Occupational_Exposure_Staph_pig_PR$diflogCI/3.92
```

```
#pr.occu.exp.staph.pig<-rma(yi = (Occupational_Exposure_Staph_pig_PR$logOR) , sei =  
(Occupational_Exposure_Staph_pig_PR$logSE), method = "ML",measure = "RR")
```

```
#summary(pr.occu.exp.staph.pig)
```

```
#epidermis
```

```
Occupational_Exposure_epi<-subset(Occupational_Exposure,  
Occupational_Exposure$GroupGood=="Staphylococcus epidermidis")
```

```
# no meta. time frame too different
```

```
#homolyticus
```

```
Occupational_Exposure_haemo_PR_pig<-subset(Occupational_Exposure,  
Occupational_Exposure$GroupGood=="Staphylococcus haemolyticus")
```

```
# no meta. time frame too different
```

```
##### Pets to humans
```

```
Pet_to_human_ecoli_OR<-subset(Pet_to_human, Pet_to_human$GroupGood=="E.Coli"  
&Pet_to_human$Method.of.estimation=="OR")
```

```
Pet_to_human_ecoli_OR$logOR<-log(Pet_to_human_ecoli_OR$Num_Estimate)
```

```
Pet_to_human_ecoli_OR$loglb<-log(Pet_to_human_ecoli_OR$Num_lb)
Pet_to_human_ecoli_OR$logub<-log(Pet_to_human_ecoli_OR$Num_ub)
Pet_to_human_ecoli_OR$diflogCI<- Pet_to_human_ecoli_OR$logub-Pet_to_human_ecoli_OR$loglb
Pet_to_human_ecoli_OR$logSE<-Pet_to_human_ecoli_OR$diflogCI/3.92
```

```
OR.pet.tp.human.ecoli<-rma(yi = (Pet_to_human_ecoli_OR$logOR) , sei =
(Pet_to_human_ecoli_OR$logSE), method = "ML",measure = "OR")
```

```
summary(OR.pet.tp.human.ecoli)
```

```
Pet_to_human_entero_OR<-subset(Pet_to_human,
Pet_to_human$GroupGood=="Enterobacteriaceae(multiple or unspecified)"
&Pet_to_human$Method.of.estimation=="OR")
```

```
Pet_to_human_entero_OR$logOR<-log(Pet_to_human_entero_OR$Num_Estimate)
```

```
Pet_to_human_entero_OR$loglb<-log(Pet_to_human_entero_OR$Num_lb)
```

```
Pet_to_human_entero_OR$logub<-log(Pet_to_human_entero_OR$Num_ub)
```

```
Pet_to_human_entero_OR$diflogCI<- Pet_to_human_entero_OR$logub-
Pet_to_human_entero_OR$loglb
```

```
Pet_to_human_entero_OR$logSE<-Pet_to_human_entero_OR$diflogCI/3.92
```

```
#OR.pet.tp.human.entero<-rma(yi = (Pet_to_human_entero_OR$logOR) , sei =
(Pet_to_human_entero_OR$logSE), method = "ML",measure = "OR")
```

```
#summary(OR.pet.tp.human.entero)
```

```
#no similar time span
```

```
Pet_to_human_staph_OR<-subset(Pet_to_human, Pet_to_human$GroupGood=="Staphylococci"
&Pet_to_human$Method.of.estimation=="OR")
```

```
Pet_to_human_staph_OR$logOR<-log(Pet_to_human_staph_OR$Num_Estimate)
```

```
Pet_to_human_staph_OR$loglb<-log(Pet_to_human_staph_OR$Num_lb)
```

```
Pet_to_human_staph_OR$logub<-log(Pet_to_human_staph_OR$Num_ub)
```

```
Pet_to_human_staph_OR$diflogCI<- Pet_to_human_staph_OR$logub-
Pet_to_human_staph_OR$loglb
```

```
Pet_to_human_staph_OR$logSE<-Pet_to_human_staph_OR$diflogCI/3.92
```

```
OR.pet.tp.human.staph<-rma(yi = (Pet_to_human_staph_OR$logOR) , sei =  
(Pet_to_human_staph_OR$logSE), method = "ML",measure = "OR")  
  
summary(OR.pet.tp.human.staph)
```

```
#S Aureus
```

```
Risk_Pet_to_human_saureus<-subset(Pet_to_human, Pet_to_human$GroupGood=="S. Aureus" &  
Pet_to_human$Method.of.estimation=="Risk")
```

```
Genes_Pet_to_human_saureus<-subset(Pet_to_human, Pet_to_human$GroupGood=="S. Aureus" &  
Pet_to_human$Method.of.estimation=="Genes")
```

```
Risk_Pet_to_human_saureus<-Risk_Pet_to_human_saureus[c(1:2,5),]
```

```
Risk_Pet_to_human_saureus$id<-c(1:3)
```

```
Risk_Pet_to_human_saureus$Num_Estimate<- (as.numeric(gsub("\\%", "",  
Risk_Pet_to_human_saureus$Estimate)))/100
```

```
Risk_Pet_to_human_saureus$Sample.size<-as.numeric(as.character(  
Risk_Pet_to_human_saureus$Sample.size))
```

```
Risk_Pet_to_human_saureus$Events<- Risk_Pet_to_human_saureus$Sample.size*  
Risk_Pet_to_human_saureus$Num_Estimate
```

```
Risk_Pet_to_human_saureus$Events_integer<-round( Risk_Pet_to_human_saureus$Events)
```

```
Risk_Pet_to_human_saureus$No_Event<- Risk_Pet_to_human_saureus$Sample.size-  
Risk_Pet_to_human_saureus$Events_integer
```

```
model.risk.pethuman.saureus<-  
glmer(Events_integer/Sample.size~1+(1|id),weights=Sample.size,data=  
Risk_Pet_to_human_saureus,family="binomial")  
  
se.logit.risk.pethuman.saureus<-sqrt(vcov(model.risk.pethuman.saureus))
```

```
Genes_Pet_to_human_saureus_horse<-Genes_Pet_to_human_saureus[c(2,5,9),] # Eventually  
decided that these are two different two use in paper
```

```
Genes_Pet_to_human_saureus<-Genes_Pet_to_human_saureus[c(1,3,4,6,8,10),] # one estimate is  
on % of transmission, so I will leave that one out
```

```
Genes_Pet_to_human_saureus<-Genes_Pet_to_human_saureus[c(2:6),]
```



```

Genes_Pet_to_human_saureus$id<-c(1:5)

Genes_Pet_to_human_saureus$Num_Estimate<- (as.numeric(gsub("\\\\%",],"",
Genes_Pet_to_human_saureus$Estimate)))/100

Genes_Pet_to_human_saureus$Sample.size<-as.numeric(as.character(
Genes_Pet_to_human_saureus$Sample.size))

Genes_Pet_to_human_saureus$Events<- Genes_Pet_to_human_saureus$Sample.size*
Genes_Pet_to_human_saureus$Num_Estimate

Genes_Pet_to_human_saureus$Events_integer<-round( Genes_Pet_to_human_saureus$Events)

Genes_Pet_to_human_saureus$No_Event<- Genes_Pet_to_human_saureus$Sample.size-
Genes_Pet_to_human_saureus$Events_integer

```

```

modelGenes_Pet_to_human_saureus<-
glmer(Events_integer/Sample.size~1+(1|id),weights=Sample.size,data=
Genes_Pet_to_human_saureus,family="binomial")

se.logitGenes_Pet_to_human_saureus<-sqrt(vcov(modelGenes_Pet_to_human_saureus))

```

```

kiekje<-subset(Transmission, Transmission$GroupGood=="Other")

```

```

Genes_Pet_to_human_saureus_horse$id<-c(1:3)

Genes_Pet_to_human_saureus_horse$Num_Estimate<- (as.numeric(gsub("\\\\%",],"",
Genes_Pet_to_human_saureus_horse$Estimate)))/100

Genes_Pet_to_human_saureus_horse$Sample.size<-as.numeric(as.character(
Genes_Pet_to_human_saureus_horse$Sample.size))

Genes_Pet_to_human_saureus_horse$Events<-
Genes_Pet_to_human_saureus_horse$Sample.size*
Genes_Pet_to_human_saureus_horse$Num_Estimate

Genes_Pet_to_human_saureus_horse$Events_integer<-round(
Genes_Pet_to_human_saureus_horse$Events)

Genes_Pet_to_human_saureus_horse$No_Event<-
Genes_Pet_to_human_saureus_horse$Sample.size-
Genes_Pet_to_human_saureus_horse$Events_integer

```

```

modelGenes_Pet_to_human_saureus_horse<-
glmer(Events_integer/Sample.size~1+(1|id),weights=Sample.size,data=
Genes_Pet_to_human_saureus_horse,family="binomial")

se.logitGenes_Pet_to_human_saureus_horse<-
sqrt(vcov(modelGenes_Pet_to_human_saureus_horse))

```

```
##### Prior colonised patient in room
```

```
Prior_col_patient_abau<-subset(Prior_col_patient, Prior_col_patient$GroupGood=="Acinetobacter baumannii")
```

```
Prior_col_patient_pseu<-subset(Prior_col_patient, Prior_col_patient$GroupGood=="Pseudomonas aeruginosa")
```

```
# Do not pool, seems like the same study just published elsewhere
```

```
##### Contaminated room
```

```
Contaminated_room_VRE<-subset(Contaminated_room, Contaminated_room$GroupGood=="VRE")
```

```
##### Space sharing
```

```
Sharing_room<-Space_sharing[c(2,3,5,6,7,11),]
```

```
Sharing_room_entero_OR<-subset(Sharing_room, Sharing_room$GroupGood=="Enterobacteriaceae(multiple or unspecified)"&Sharing_room$Method.of.estimation=="OR")
```

```
Sharing_room_entero_OR$logOR<-log(Sharing_room_entero_OR$Num_Estimate)
```

```
Sharing_room_entero_OR$loglb<-log(Sharing_room_entero_OR$Num_lb)
```

```
Sharing_room_entero_OR$logub<-log(Sharing_room_entero_OR$Num_ub)
```

```
Sharing_room_entero_OR$diflogCI<- Sharing_room_entero_OR$logub-Sharing_room_entero_OR$loglb
```

```
Sharing_room_entero_OR$logSE<-Sharing_room_entero_OR$diflogCI/3.92
```

```
OR.sharingroom.or<-rma(yi = (Sharing_room_entero_OR$logOR) , sei = (Sharing_room_entero_OR$logSE), method = "ML",measure = "OR")
```

```
summary(OR.sharingroom.or)
```

```
##### Travelling
```

```
# OR
```

```
# e coli
```

```
Travelling_OR_Ecoli<-subset(Travelling, Travelling$Method.of.estimation=="OR" & Travelling$GroupGood=="E.Coli")
```

```
Travelling_OR_Ecoli_SA<-subset(Travelling_OR_Ecoli, Travelling_OR_Ecoli$Transmission.route=="To India" | Travelling_OR_Ecoli$Transmission.route=="India" | Travelling_OR_Ecoli$Transmission.route=="Afghanistan")
```

```
Travelling_OR_Ecoli_SA$logOR<-log(Travelling_OR_Ecoli_SA$Num_Estimate)
```

```
Travelling_OR_Ecoli_SA$loglb<-log(Travelling_OR_Ecoli_SA$Num_lb)
```

```
Travelling_OR_Ecoli_SA$logub<-log(Travelling_OR_Ecoli_SA$Num_ub)
```

```
Travelling_OR_Ecoli_SA$diflogCI<- Travelling_OR_Ecoli_SA$logub-Travelling_OR_Ecoli_SA$loglb
```

```
Travelling_OR_Ecoli_SA$logSE<-Travelling_OR_Ecoli_SA$diflogCI/3.92
```

```
OR.travel_SA_Ecoli<-rma(yi = (Travelling_OR_Ecoli_SA$logOR) , sei = (Travelling_OR_Ecoli_SA$logSE), method = "ML",measure = "OR")
```

```
summary(OR.travel_SA_Ecoli)
```

```
# Entero
```

```
Travelling_OR_Enterо<-subset(Travelling, Travelling$Method.of.estimation=="OR" & Travelling$GroupGood=="Enterobacteriaceae(multiple or unspecified)")
```

```
Travelling_OR_Enterо_SEA<-subset(Travelling_OR_Enterо, Travelling_OR_Enterо$Transmission.route=="South East Asia last 3 months" |
```

```
Travelling_OR_Enterо$Transmission.route=="South east Asia last 12 months" | Travelling_OR_Enterо$Transmission.route=="Wester pacific last 3 months" |
```

```
Travelling_OR_Enterо$Transmission.route=="Wester pacific last 12 months")
```

```
Travelling_OR_Enterо_SEA$logOR<-log(Travelling_OR_Enterо_SEA$Num_Estimate)
```

```
Travelling_OR_Enterо_SEA$loglb<-log(Travelling_OR_Enterо_SEA$Num_lb)
```

```
Travelling_OR_Enterо_SEA$logub<-log(Travelling_OR_Enterо_SEA$Num_ub)
```

```
Travelling_OR_Enterо_SEA$diflogCI<- Travelling_OR_Enterо_SEA$logub-Travelling_OR_Enterо_SEA$loglb
```

```
Travelling_OR_Enterо_SEA$logSE<-Travelling_OR_Enterо_SEA$diflogCI/3.92
```

```
OR.travel_SEA_Enterо<-rma(yi = (Travelling_OR_Enterо_SEA$logOR) , sei = (Travelling_OR_Enterо_SEA$logSE), method = "ML",measure = "OR")
```

```
summary(OR.travel_SEA_Enterо)
```

```
Travelling_OR_Enterо_SA<-subset(Travelling_OR_Enterо, Travelling_OR_Enterо$Transmission.route=="India" |
```

```
Travelling_OR_Enteror$Transmission.route=="to India")
```

```
Travelling_OR_Enteror_SA$logOR<-log(Travelling_OR_Enteror_SA$Num_Estimate)
```

```
Travelling_OR_Enteror_SA$loglb<-log(Travelling_OR_Enteror_SA$Num_lb)
```

```
Travelling_OR_Enteror_SA$logub<-log(Travelling_OR_Enteror_SA$Num_ub)
```

```
Travelling_OR_Enteror_SA$diflogCI<- Travelling_OR_Enteror_SA$logub-  
Travelling_OR_Enteror_SA$loglb
```

```
Travelling_OR_Enteror_SA$logSE<-Travelling_OR_Enteror_SA$diflogCI/3.92
```

```
OR.travel_SA_Enteror<-rma(yi = (Travelling_OR_Enteror_SA$logOR) , sei =  
(Travelling_OR_Enteror_SA$logSE), method = "ML",measure = "OR")
```

```
summary(OR.travel_SA_Enteror)
```

```
view(Travelling_OR_Enteror_SA)
```

```
view(Travelling_OR_Enteror_SEA)
```

```
Travelling_OR_Enteror_America<-subset(Travelling_OR_Enteror,  
Travelling_OR_Enteror$Transmission.route=="America last 3 months"|  
Travelling_OR_Enteror$Transmission.route=="America last 12 months")
```

```
#Travelling_OR_Enteror_America$Num_ub[1]<-170.6387
```

```
#Travelling_OR_Enteror_America$Num_ub[2]<-160.8023
```

```
Travelling_OR_Enteror_America$logOR<-log(Travelling_OR_Enteror_America$Num_Estimate)
```

```
Travelling_OR_Enteror_America$loglb<-log(Travelling_OR_Enteror_America$Num_lb)
```

```
Travelling_OR_Enteror_America$logub<-log(Travelling_OR_Enteror_America$Num_ub)
```

```
Travelling_OR_Enteror_America$diflogCI<- Travelling_OR_Enteror_America$logub-  
Travelling_OR_Enteror_America$loglb
```

```
Travelling_OR_Enteror_America$logSE<-Travelling_OR_Enteror_America$diflogCI/3.92
```

```
OR.travel_Amerika_enter<-rma(yi = (Travelling_OR_Enteror_America$logOR) , sei =  
(Travelling_OR_Enteror_America$logSE), method = "ML",measure = "OR")
```

```
summary(OR.travel_Amerika_enter)
```

```
Travelling_OR_Enteror_WA<-subset(Travelling_OR_Enteror,  
Travelling_OR_Enteror$Transmission.route=="Eastern Mediterranean last 12 months"|
```

```
Travelling_OR_Enteror$Transmission.route=="Eastern Mediterranean last 3 months" |
Travelling_OR_Enteror$Transmission.route=="to Turkey")
```

```
Travelling_OR_Enteror_WA$logOR<-log(Travelling_OR_Enteror_WA$Num_Estimate)
```

```
Travelling_OR_Enteror_WA$loglb<-log(Travelling_OR_Enteror_WA$Num_lb)
```

```
Travelling_OR_Enteror_WA$logub<-log(Travelling_OR_Enteror_WA$Num_ub)
```

```
Travelling_OR_Enteror_WA$diflogCI<- Travelling_OR_Enteror_WA$logub-
Travelling_OR_Enteror_WA$loglb
```

```
Travelling_OR_Enteror_WA$logSE<-Travelling_OR_Enteror_WA$diflogCI/3.92
```

```
OR.travel_WA_enteror<-rma(yi = (Travelling_OR_Enteror_WA$logOR) , sei =
(Travelling_OR_Enteror_WA$logSE), method = "ML",measure = "OR")
```

```
summary(OR.travel_WA_enteror)
```

```
Travelling_OR_Enteror_Africa<-subset(Travelling_OR_Enteror,
Travelling_OR_Enteror$Transmission.route=="Africa last 3 months" |
Travelling_OR_Enteror$Transmission.route=="Africa last 12 months" |
Travelling_OR_Enteror$Transmission.route=="to Northern Africa" |
Travelling_OR_Enteror$Transmission.route=="Africa north of equator")
```

```
Travelling_OR_Enteror_Africa$logOR<-log(Travelling_OR_Enteror_Africa$Num_Estimate)
```

```
Travelling_OR_Enteror_Africa$loglb<-log(Travelling_OR_Enteror_Africa$Num_lb)
```

```
Travelling_OR_Enteror_Africa$logub<-log(Travelling_OR_Enteror_Africa$Num_ub)
```

```
Travelling_OR_Enteror_Africa$diflogCI<- Travelling_OR_Enteror_Africa$logub-
Travelling_OR_Enteror_Africa$loglb
```

```
Travelling_OR_Enteror_Africa$logSE<-Travelling_OR_Enteror_Africa$diflogCI/3.92
```

```
OR.travel_Africa_enteror<-rma(yi = (Travelling_OR_Enteror_Africa$logOR) , sei =
(Travelling_OR_Enteror_Africa$logSE), method = "ML",measure = "OR")
```

```
summary(OR.travel_Africa_enteror)
```

```
Travelling_OR_Enteror_LatinAmerica<-subset(Travelling_OR_Enteror,
Travelling_OR_Enteror$Transmission.route=="Latin America")
```

```
Travelling_OR_Enteror_LatinAmerica$logOR<-
log(Travelling_OR_Enteror_LatinAmerica$Num_Estimate)
```

```
Travelling_OR_Enteror_LatinAmerica$loglb<-log(Travelling_OR_Enteror_LatinAmerica$Num_lb)
```

```
Travelling_OR_Enteror_LatinAmerica$logub<-log(Travelling_OR_Enteror_LatinAmerica$Num_ub)
```

```
Travelling_OR_Enterо_LatinAmerica$diflogCI<- Travelling_OR_Enterо_LatinAmerica$logub-  
Travelling_OR_Enterо_LatinAmerica$loglb
```

```
Travelling_OR_Enterо_LatinAmerica$logSE<-Travelling_OR_Enterо_LatinAmerica$diflogCI/3.92
```

```
OR.travel_LA_entero<-rma(yi = (Travelling_OR_Enterо_LatinAmerica$logOR) , sei =  
(Travelling_OR_Enterо_LatinAmerica$logSE), method = "ML",measure = "OR")
```

```
summary(OR.travel_LA_entero)
```

```
Travelling_OR_Enterо_Asia_unsp<-subset(Travelling_OR_Enterо,  
Travelling_OR_Enterо$Transmission.route=="Asia  
"|Travelling_OR_Enterо$Transmission.route=="Asia (expect for India)")
```

```
Travelling_OR_Enterо_Asia_unsp$logOR<-log(Travelling_OR_Enterо_Asia_unsp$Num_Estimate)
```

```
Travelling_OR_Enterо_Asia_unsp$loglb<-log(Travelling_OR_Enterо_Asia_unsp$Num_lb)
```

```
Travelling_OR_Enterо_Asia_unsp$logub<-log(Travelling_OR_Enterо_Asia_unsp$Num_ub)
```

```
Travelling_OR_Enterо_Asia_unsp$diflogCI<- Travelling_OR_Enterо_Asia_unsp$logub-  
Travelling_OR_Enterо_Asia_unsp$loglb
```

```
Travelling_OR_Enterо_Asia_unsp$logSE<-Travelling_OR_Enterо_Asia_unsp$diflogCI/3.92
```

```
OR.travel_Asia_entero<-rma(yi = (Travelling_OR_Enterо_Asia_unsp$logOR) , sei =  
(Travelling_OR_Enterо_Asia_unsp$logSE), method = "ML",measure = "OR")
```

```
summary(OR.travel_Asia_entero)
```

```
Travelling_OR_Enterо_Europe<-subset(Travelling_OR_Enterо,  
Travelling_OR_Enterо$Transmission.route=="Europe last 12  
months"|Travelling_OR_Enterо$Transmission.route=="Europe in last 3  
months"|Travelling_OR_Enterо$Transmission.route=="to Southern/Eastern Europe")
```

```
Travelling_OR_Enterо_Europe$logOR<-log(Travelling_OR_Enterо_Europe$Num_Estimate)
```

```
Travelling_OR_Enterо_Europe$loglb<-log(Travelling_OR_Enterо_Europe$Num_lb)
```

```
Travelling_OR_Enterо_Europe$logub<-log(Travelling_OR_Enterо_Europe$Num_ub)
```

```
Travelling_OR_Enterо_Europe$diflogCI<- Travelling_OR_Enterо_Europe$logub-  
Travelling_OR_Enterо_Europe$loglb
```

```
Travelling_OR_Enterо_Europe$logSE<-Travelling_OR_Enterо_Europe$diflogCI/3.92
```

```
OR.travel_Europe_entero<-rma(yi = (Travelling_OR_Enterо_Europe$logOR) , sei =  
(Travelling_OR_Enterо_Europe$logSE), method = "ML",measure = "OR")
```

```
summary(OR.travel_Europe_entero)
```

```
# S aureus
```

```
Travelling_OR_Saereus<-subset(Travelling, Travelling$Method.of.estimation=="OR" &  
Travelling$GroupGood=="S. Aureus")
```

```
Travelling_OR_saures_South_asia<-subset(Travelling_OR_Saereus,  
Travelling_OR_Saereus$Transmission.route=="South Asia")
```

```
Travelling_OR_saures_South_asia$logOR<-log(Travelling_OR_saures_South_asia$Num_Estimate)
```

```
Travelling_OR_saures_South_asia$loglb<-log(Travelling_OR_saures_South_asia$Num_lb)
```

```
Travelling_OR_saures_South_asia$logub<-log(Travelling_OR_saures_South_asia$Num_ub)
```

```
Travelling_OR_saures_South_asia$diflogCI<- Travelling_OR_saures_South_asia$logub-  
Travelling_OR_saures_South_asia$loglb
```

```
Travelling_OR_saures_South_asia$logSE<-Travelling_OR_saures_South_asia$diflogCI/3.92
```

```
OR.travel_SA_SAreus<-rma(yi = (Travelling_OR_saures_South_asia$logOR) , sei =  
(Travelling_OR_saures_South_asia$logSE), method = "ML",measure = "OR")
```

```
summary(OR.travel_SA_SAreus)
```

```
# Risk
```

```
Travelling_Risk<-subset(Travelling, Travelling$Method.of.estimation=="Risk")
```

```
# ecoli
```

```
Travelling_Risk_ecoli<-subset(Travelling_Risk, Travelling_Risk$GroupGood=="E.Coli")
```

```
Travelling_Risk_ecoli_eu<-  
subset(Travelling_Risk_ecoli,Travelling_Risk_ecoli$Transmission.route=="Northern  
Europe" |Travelling_Risk_ecoli$Transmission.route=="Eastern Europe"  
|Travelling_Risk_ecoli$Transmission.route=="Southern Europe"  
|Travelling_Risk_ecoli$Transmission.route=="Europe")
```

```
Travelling_Risk_ecoli_eu$id<-c(1:4)
```

```
Travelling_Risk_ecoli_eu$Num_Estimate<- (as.numeric(gsub("[\\%,]", "",  
Travelling_Risk_ecoli_eu$Estimate)))/100
```

```
Travelling_Risk_ecoli_eu$Sample.size<-as.numeric(as.character(  
Travelling_Risk_ecoli_eu$Sample.size))
```

```
Travelling_Risk_ecoli_eu$Events<- Travelling_Risk_ecoli_eu$Sample.size*  
Travelling_Risk_ecoli_eu$Num_Estimate
```

```
Travelling_Risk_ecoli_eu$Events_integer<-round( Travelling_Risk_ecoli_eu$Events)
```

```
Travelling_Risk_ecoli_eu$No_Event<- Travelling_Risk_ecoli_eu$Sample.size-  
Travelling_Risk_ecoli_eu$Events_integer
```

```
model.risk.travel.eu.ecoli<-glmer(Events_integer/Sample.size~1+(1|id),weights=Sample.size,data=  
Travelling_Risk_ecoli_eu,family="binomial")
```

```
se.logit.risk.travel.eu.ecoli<-sqrt(vcov(model.risk.travel.eu.ecoli))
```

```
Travelling_Risk_ecoli_SA<-  
subset(Travelling_Risk_ecoli,Travelling_Risk_ecoli$Transmission.route=="India"|Travelling_Risk_ecol  
i$Transmission.route=="South Asia"|Travelling_Risk_ecoli$Transmission.route=="Afghanistan")
```

```
Travelling_Risk_ecoli_SA$id<-c(1:3)
```

```
Travelling_Risk_ecoli_SA$Num_Estimate<- (as.numeric(gsub("[\\%]", "",  
Travelling_Risk_ecoli_SA$Estimate)))/100
```

```
Travelling_Risk_ecoli_SA$Sample.size<-as.numeric(as.character(  
Travelling_Risk_ecoli_SA$Sample.size))
```

```
Travelling_Risk_ecoli_SA$Events<- Travelling_Risk_ecoli_SA$Sample.size*  
Travelling_Risk_ecoli_SA$Num_Estimate
```

```
Travelling_Risk_ecoli_SA$Events_integer<-round( Travelling_Risk_ecoli_SA$Events)
```

```
Travelling_Risk_ecoli_SA$No_Event<- Travelling_Risk_ecoli_SA$Sample.size-  
Travelling_Risk_ecoli_SA$Events_integer
```

```
model.risk.travel.SA.ecoli<-glmer(Events_integer/Sample.size~1+(1|id),weights=Sample.size,data=  
Travelling_Risk_ecoli_SA,family="binomial")
```

```
se.logit.risk.travel.SA.ecoli<-sqrt(vcov(model.risk.travel.SA.ecoli))
```

```
Travelling_Risk_ecoli_LA<-  
subset(Travelling_Risk_ecoli,Travelling_Risk_ecoli$Transmission.route=="Southern  
America"|Travelling_Risk_ecoli$Transmission.route=="Mexico, Caribbean & Central  
america"|Travelling_Risk_ecoli$Transmission.route=="South America")
```

```
Travelling_Risk_ecoli_LA$id<-c(1:3)
```

```
Travelling_Risk_ecoli_LA$Num_Estimate<- (as.numeric(gsub("[\\%]", "",  
Travelling_Risk_ecoli_LA$Estimate)))/100
```

```
Travelling_Risk_ecoli_LA$Sample.size<-as.numeric(as.character(  
Travelling_Risk_ecoli_LA$Sample.size))
```

```
Travelling_Risk_ecoli_LA$Events<- Travelling_Risk_ecoli_LA$Sample.size*  
Travelling_Risk_ecoli_LA$Num_Estimate
```



```

Travelling_Risk_ecoli_LA$Events_integer<-round( Travelling_Risk_ecoli_LA$Events)

Travelling_Risk_ecoli_LA$No_Event<- Travelling_Risk_ecoli_LA$Sample.size-
Travelling_Risk_ecoli_LA$Events_integer

model.risk.travel.ecoli.LA<-glmer(Events_integer/Sample.size~1+(1|id),weights=Sample.size,data=
Travelling_Risk_ecoli_LA,family="binomial")

se.logit.model.risk.travel.ecoli.LA<-sqrt(vcov(model.risk.travel.ecoli.LA))

```

```

Travelling_Risk_ecoli_Asia_un<-
subset(Travelling_Risk_ecoli,Travelling_Risk_ecoli$Transmission.route=="Asia")

Travelling_Risk_ecoli_Asia_un$id<-c(1:2)

Travelling_Risk_ecoli_Asia_un$Num_Estimate<- (as.numeric(gsub("[\\%],"",
Travelling_Risk_ecoli_Asia_un$Estimate)))/100

Travelling_Risk_ecoli_Asia_un$Sample.size<-as.numeric(as.character(
Travelling_Risk_ecoli_Asia_un$Sample.size))

Travelling_Risk_ecoli_Asia_un$Events<- Travelling_Risk_ecoli_Asia_un$Sample.size*
Travelling_Risk_ecoli_Asia_un$Num_Estimate

Travelling_Risk_ecoli_Asia_un$Events_integer<-round( Travelling_Risk_ecoli_Asia_un$Events)

Travelling_Risk_ecoli_Asia_un$No_Event<- Travelling_Risk_ecoli_Asia_un$Sample.size-
Travelling_Risk_ecoli_Asia_un$Events_integer

```

```

model.risk.travel.asia.ecoli<-glmer(Events_integer/Sample.size~1+(1|id),weights=Sample.size,data=
Travelling_Risk_ecoli_Asia_un,family="binomial")

se.logit.risk.travel.asia.ecoli<-sqrt(vcov(model.risk.travel.asia.ecoli))

```

```

Travelling_Risk_ecoli_Africa<-
subset(Travelling_Risk_ecoli,Travelling_Risk_ecoli$Transmission.route=="Africa" |Travelling_Risk_ec
oli$Transmission.route=="Cote d'Ivoire" |Travelling_Risk_ecoli$Transmission.route=="French
Guiana")

Travelling_Risk_ecoli_Africa$id<-c(1:4)

Travelling_Risk_ecoli_Africa$Num_Estimate<- (as.numeric(gsub("[\\%],"",
Travelling_Risk_ecoli_Africa$Estimate)))/100

Travelling_Risk_ecoli_Africa$Sample.size<-as.numeric(as.character(
Travelling_Risk_ecoli_Africa$Sample.size))

Travelling_Risk_ecoli_Africa$Events<- Travelling_Risk_ecoli_Africa$Sample.size*
Travelling_Risk_ecoli_Africa$Num_Estimate

```

```
Travelling_Risk_ecoli_Africa$Events_integer<-round( Travelling_Risk_ecoli_Africa$Events)
```

```
Travelling_Risk_ecoli_Africa$No_Event<- Travelling_Risk_ecoli_Africa$Sample.size-  
Travelling_Risk_ecoli_Africa$Events_integer
```

```
model.risk.travel.africa.ecoli<-  
glmer(Events_integer/Sample.size~1+(1|id),weights=Sample.size,data=  
Travelling_Risk_ecoli_Africa,family="binomial")
```

```
se.logit.risk.travel.africa.ecoli<-sqrt(vcov(model.risk.travel.africa.ecoli))
```

```
#entero
```

```
Travelling_Risk_entero<-subset(Travelling_Risk,  
Travelling_Risk$GroupGood=="Enterobacteriaceae(multiple or unspecified)")
```

```
Travelling_Risk_entero_africa<-subset(Travelling_Risk_entero,  
Travelling_Risk_entero$Transmission.route=="Africa" |  
Travelling_Risk_entero$Transmission.route=="North Africa" |  
Travelling_Risk_entero$Transmission.route=="Central Africa" |
```

```
Travelling_Risk_entero$Transmission.route=="Southern Africa" |  
Travelling_Risk_entero$Transmission.route=="Northern Africa" |  
Travelling_Risk_entero$Transmission.route=="Middle and Eastern Africa" |  
Travelling_Risk_entero$Transmission.route=="Western Africa" |
```

```
Travelling_Risk_entero$Transmission.route=="Africa" | Travelling_Risk_entero$Transmission.route=="  
"West and Central Africa" | Travelling_Risk_entero$Transmission.route=="East Africa")
```

```
Travelling_Risk_entero_africa$id<-c(1:12)
```

```
Travelling_Risk_entero_africa$Num_Estimate<- (as.numeric(gsub("[\\%],"",  
Travelling_Risk_entero_africa$Estimate)))/100
```

```
Travelling_Risk_entero_africa$Sample.size<-as.numeric(as.character(  
Travelling_Risk_entero_africa$Sample.size))
```

```
Travelling_Risk_entero_africa$Events<- Travelling_Risk_entero_africa$Sample.size*  
Travelling_Risk_entero_africa$Num_Estimate
```

```
Travelling_Risk_entero_africa$Events_integer<-round( Travelling_Risk_entero_africa$Events)
```

```
Travelling_Risk_entero_africa$No_Event<- Travelling_Risk_entero_africa$Sample.size-  
Travelling_Risk_entero_africa$Events_integer
```

```
model.risk.travel.africa.entero<-  
glmer(Events_integer/Sample.size~1+(1|id),weights=Sample.size,data=  
Travelling_Risk_entero_africa,family="binomial")  
  
se.logit.risk.travel.africa.entero<-sqrt(vcov(model.risk.travel.africa.entero))
```

```
Travelling_Risk_entero_LA<-subset(Travelling_Risk_entero,  
Travelling_Risk_entero$Transmission.route=="Central America" |  
Travelling_Risk_entero$Transmission.route=="South America" |  
Travelling_Risk_entero$Transmission.route=="Central America and Caribbean" |  
Travelling_Risk_entero$Transmission.route=="Caribbean and Central  
America" | Travelling_Risk_entero$Transmission.route=="Latin America" |  
Travelling_Risk_entero$Transmission.route=="Central America and the Caribbean")
```

```
Travelling_Risk_entero_LA$id<-c(1:9)
```

```
Travelling_Risk_entero_LA$Num_Estimate<- (as.numeric(gsub("[\\%],"",  
Travelling_Risk_entero_LA$Estimate)))/100
```

```
Travelling_Risk_entero_LA$Sample.size<-as.numeric(as.character(  
Travelling_Risk_entero_LA$Sample.size))
```

```
Travelling_Risk_entero_LA$Events<- Travelling_Risk_entero_LA$Sample.size*  
Travelling_Risk_entero_LA$Num_Estimate
```

```
Travelling_Risk_entero_LA$Events_integer<-round( Travelling_Risk_entero_LA$Events)
```

```
Travelling_Risk_entero_LA$No_Event<- Travelling_Risk_entero_LA$Sample.size-  
Travelling_Risk_entero_LA$Events_integer
```

```
model.risk.travel.LA_enter<-glmer(Events_integer/Sample.size~1+(1|id),weights=Sample.size,data=  
Travelling_Risk_entero_LA,family="binomial")  
  
se.logit.risk.travel.LA_enter<-sqrt(vcov(model.risk.travel.LA_enter))
```

```
Travelling_Risk_entero_SA<-subset(Travelling_Risk_entero,  
Travelling_Risk_entero$Transmission.route=="India" |  
Travelling_Risk_entero$Transmission.route=="South Asia" |  
Travelling_Risk_entero$Transmission.route=="Souther Asia")
```

```
Travelling_Risk_entero_SA$id<-c(1:5)
```

```
Travelling_Risk_entero_SA$Num_Estimate<- (as.numeric(gsub("[\\%],"",  
Travelling_Risk_entero_SA$Estimate)))/100
```

```
Travelling_Risk_entero_SA$Sample.size<-as.numeric(as.character(  
Travelling_Risk_entero_SA$Sample.size))
```

```
Travelling_Risk_entero_SA$Events<- Travelling_Risk_entero_SA$Sample.size*  
Travelling_Risk_entero_SA$Num_Estimate
```

```
Travelling_Risk_entero_SA$Events_integer<-round( Travelling_Risk_entero_SA$Events)
```

```
Travelling_Risk_entero_SA$No_Event<- Travelling_Risk_entero_SA$Sample.size-  
Travelling_Risk_entero_SA$Events_integer
```

```
#view(Travelling_Risk_entero_SA)
```

```
model.risk.travel.SA.entero<-glmer(Events_integer/Sample.size~1+(1|id),weights=Sample.size,data=  
Travelling_Risk_entero_SA,family="binomial")
```

```
se.logit.risk.travel.SA.entero<-sqrt(vcov(model.risk.travel.SA.entero))
```

```
Travelling_Risk_entero_WA<-subset(Travelling_Risk_entero,  
Travelling_Risk_entero$Transmission.route=="Middle East"|  
Travelling_Risk_entero$Transmission.route=="Western Asia")
```

```
Travelling_Risk_entero_WA$id<-c(1:3)
```

```
Travelling_Risk_entero_WA$Num_Estimate<- (as.numeric(gsub("[\\%,]", "",  
Travelling_Risk_entero_WA$Estimate)))/100
```

```
Travelling_Risk_entero_WA$Sample.size<-as.numeric(as.character(  
Travelling_Risk_entero_WA$Sample.size))
```

```
Travelling_Risk_entero_WA$Events<- Travelling_Risk_entero_WA$Sample.size*  
Travelling_Risk_entero_WA$Num_Estimate
```

```
Travelling_Risk_entero_WA$Events_integer<-round( Travelling_Risk_entero_WA$Events)
```

```
Travelling_Risk_entero_WA$No_Event<- Travelling_Risk_entero_WA$Sample.size-  
Travelling_Risk_entero_WA$Events_integer
```

```
model.risk.travel.wa.entero<-  
glmer(Events_integer/Sample.size~1+(1|id),weights=Sample.size,data=  
Travelling_Risk_entero_WA,family="binomial")
```

```
se.logit.risk.travel.wa.entero<-sqrt(vcov(model.risk.travel.wa.entero))
```

```
Travelling_Risk_entero_SEA<-subset(Travelling_Risk_entero,  
Travelling_Risk_entero$Transmission.route=="Southeast Asia"|  
Travelling_Risk_entero$Transmission.route=="Southeastern Asia"|  
Travelling_Risk_entero$Transmission.route=="South East Asia")
```

```
Travelling_Risk_entero_SEA$id<-c(1:3)
```

```

Travelling_Risk_entero_SEA$Num_Estimate<- (as.numeric(gsub("[\\%,]", "",
Travelling_Risk_entero_SEA$Estimate)))/100

Travelling_Risk_entero_SEA$Sample.size<-as.numeric(as.character(
Travelling_Risk_entero_SEA$Sample.size))

Travelling_Risk_entero_SEA$Events<- Travelling_Risk_entero_SEA$Sample.size*
Travelling_Risk_entero_SEA$Num_Estimate

Travelling_Risk_entero_SEA$Events_integer<-round( Travelling_Risk_entero_SEA$Events)

Travelling_Risk_entero_SEA$No_Event<- Travelling_Risk_entero_SEA$Sample.size-
Travelling_Risk_entero_SEA$Events_integer

model.risk.travel.SEA.entero<-
glmer(Events_integer/Sample.size~1+(1|id),weights=Sample.size,data=
Travelling_Risk_entero_SEA,family="binomial")

se.logit.risk.travel.SEA.entero<-sqrt(vcov(model.risk.travel.SEA.entero))

#view(Travelling_Risk_entero_SEA)

Travelling_Risk_entero_EU<-subset(Travelling_Risk_entero,
Travelling_Risk_entero$Transmission.route=="Southern Europe")

Travelling_Risk_entero_EU$id<-c(1:2)

Travelling_Risk_entero_EU$Num_Estimate<- (as.numeric(gsub("[\\%,]", "",
Travelling_Risk_entero_EU$Estimate)))/100

Travelling_Risk_entero_EU$Sample.size<-as.numeric(as.character(
Travelling_Risk_entero_EU$Sample.size))

Travelling_Risk_entero_EU$Events<- Travelling_Risk_entero_EU$Sample.size*
Travelling_Risk_entero_EU$Num_Estimate

Travelling_Risk_entero_EU$Events_integer<-round( Travelling_Risk_entero_EU$Events)

Travelling_Risk_entero_EU$No_Event<- Travelling_Risk_entero_EU$Sample.size-
Travelling_Risk_entero_EU$Events_integer

model.risk.travel.entero.eu<-glmer(Events_integer/Sample.size~1+(1|id),weights=Sample.size,data=
Travelling_Risk_entero_EU,family="binomial")

se.logit.risk.travel.entero.eu<-sqrt(vcov(model.risk.travel.entero.eu))

Travelling_Risk_entero_Asia_unspec<-subset(Travelling_Risk_entero,
Travelling_Risk_entero$Transmission.route=="Asia"|

```

```
Travelling_Risk_entero$Transmission.route=="Asia (India, Thailand, Laos, Cambodia, and Vietnam excluded)")
```

```
Travelling_Risk_entero_Asia_unspec$Id<-c(1:3)
```

```
Travelling_Risk_entero_Asia_unspec$Num_Estimate<- (as.numeric(gsub("[\\%]", "",  
Travelling_Risk_entero_Asia_unspec$Estimate)))/100
```

```
Travelling_Risk_entero_Asia_unspec$Sample.size<-as.numeric(as.character(  
Travelling_Risk_entero_Asia_unspec$Sample.size))
```

```
Travelling_Risk_entero_Asia_unspec$Events<- Travelling_Risk_entero_Asia_unspec$Sample.size*  
Travelling_Risk_entero_Asia_unspec$Num_Estimate
```

```
Travelling_Risk_entero_Asia_unspec$Events_integer<-round(  
Travelling_Risk_entero_Asia_unspec$Events)
```

```
Travelling_Risk_entero_Asia_unspec$No_Event<- Travelling_Risk_entero_Asia_unspec$Sample.size-  
Travelling_Risk_entero_Asia_unspec$Events_integer
```

```
model.risk.travel.asia.entero<-
```

```
glmer(Events_integer/Sample.size~1+(1|id),weights=Sample.size,data=  
Travelling_Risk_entero_Asia_unspec,family="binomial")
```

```
se.logit.risk.travel.asia.entero<-sqrt(vcov(model.risk.travel.asia.entero))
```

```
Travelling_Risk_entero_CentralEastA<-subset(Travelling_Risk_entero,  
Travelling_Risk_entero$Transmission.route=="Central Asia" |  
Travelling_Risk_entero$Transmission.route=="Central and Eastern Asia" |  
Travelling_Risk_entero$Transmission.route=="East Asia")
```

```
Travelling_Risk_entero_CentralEastA$Id<-c(1:3)
```

```
Travelling_Risk_entero_CentralEastA$Num_Estimate<- (as.numeric(gsub("[\\%]", "",  
Travelling_Risk_entero_CentralEastA$Estimate)))/100
```

```
Travelling_Risk_entero_CentralEastA$Sample.size<-as.numeric(as.character(  
Travelling_Risk_entero_CentralEastA$Sample.size))
```

```
Travelling_Risk_entero_CentralEastA$Events<- Travelling_Risk_entero_CentralEastA$Sample.size*  
Travelling_Risk_entero_CentralEastA$Num_Estimate
```

```
Travelling_Risk_entero_CentralEastA$Events_integer<-round(  
Travelling_Risk_entero_CentralEastA$Events)
```

```
Travelling_Risk_entero_CentralEastA$No_Event<-  
Travelling_Risk_entero_CentralEastA$Sample.size-  
Travelling_Risk_entero_CentralEastA$Events_integer
```

```

model.risk.travel.centraleast.entero<-
glmer(Events_integer/Sample.size~1+(1|id),weights=Sample.size,data=
Travelling_Risk_entero_CentralEastA,family="binomial")

se.logit.risk.travel.centraleast.entero<-sqrt(vcov(model.risk.travel.centraleast.entero))

#PR

Travelling_PR<-subset(Travelling, Travelling$Method.of.estimation=="PR") #8, 1 entero multi de rest
1. coli

# non because unspecific multiple countries or only1 estimate

# Potential new extra meta-analysis based on >2 estimates

Animal_animal_risk_other<-subset(Animal_to_animal,
Animal_to_animal$Method.of.estimation=="Risk")# no to different

air_to_animal<-subset(Transmission, Transmission$Transmission.Group=="Air to animal")# no to
different

#Eating_meat # no to different

environnement_to_human<-subset(Transmission, Transmission$Transmission.Group=="Environment -
> human")# no to different

food_to_animal<-subset(Transmission, Transmission$Transmission.Group=="Food-> animal")# no to
different

human_to_air<-subset(Transmission, Transmission$Transmission.Group=="Human-> Air")# no to
different

Interventions<-subset(Transmission, Transmission$Transmission.Group=="Intervention")# no to
different

motheranimal_to_baby<-subset(Transmission, Transmission$Transmission.Group=="Mother
(animal) -> child")

Transmission$Sample.size[667]<-13 # WEL

motheranimal_to_baby<-subset(Transmission, Transmission$Transmission.Group=="Mother
(animal) -> child")

Genes_motheranimal_to_baby<-subset(motheranimal_to_baby,
motheranimal_to_baby$Method.of.estimation=="Genes")

Genes_motheranimal_to_baby$Id<-c(1:2)

Genes_motheranimal_to_baby$Num_Estimate<- (as.numeric(gsub("[\\%],"",
Genes_motheranimal_to_baby$Estimate)))/100

```

```

Genes_motheranimal_to_baby$Sample.size<-as.numeric(as.character(
Genes_motheranimal_to_baby$Sample.size))

Genes_motheranimal_to_baby$Events<- Genes_motheranimal_to_baby$Sample.size*
Genes_motheranimal_to_baby$Num_Estimate

Genes_motheranimal_to_baby$Events_integer<-round( Genes_motheranimal_to_baby$Events)

Genes_motheranimal_to_baby$No_Event<- Genes_motheranimal_to_baby$Sample.size-
Genes_motheranimal_to_baby$Events_integer

modelGenes_motheranimal_to_baby<-
glmer(Events_integer/Sample.size~1+(1|id),weights=Sample.size,data=
Genes_motheranimal_to_baby,family="binomial")

se.logitGenes_motheranimal_to_baby<-sqrt(vcov(modelGenes_motheranimal_to_baby))

organtransfer_risk<-subset(Transmission, Transmission$Transmission.Group=="Organ") # yes, two
of 4 can be pooled for OR

Transmission$uni.of.multi[236]<-"uni"

Other_Bathing_Showering<-subset(Transmission, Transmission$Transmission.Group=="Other
Bathing/Showering")

Other_Bathing_Showering<-Other_Bathing_Showering[c(1:2),] # Wel

Other_Bathing_Showering$logOR<-log(Other_Bathing_Showering$Num_Estimate)
Other_Bathing_Showering$loglb<-log(Other_Bathing_Showering$Num_lb)
Other_Bathing_Showering$logub<-log(Other_Bathing_Showering$Num_ub)
Other_Bathing_Showering$diflogCI<- Other_Bathing_Showering$logub-
Other_Bathing_Showering$loglb

Other_Bathing_Showering$logSE<-Other_Bathing_Showering$diflogCI/3.92

OR.bathingshowering<-rma(yi = (Other_Bathing_Showering$logOR) , sei =
(Other_Bathing_Showering$logSE), method = "ML",measure = "OR")

summary(OR.bathingshowering) #1 is body use instead of hand, change here

Transmission$Sample.size<-as.numeric(as.character(paste(Transmission$Sample.size)))

Transmission$Sample.size[234]<-"232"

```



```
Transmission$Num_ub[234]<-"0.778"
```

```
Transmission$Num_lb[234]<-"0.118"
```

```
Transmission$Num_Estimate[234]<-"0.303"
```

```
Other_soap<-subset(Transmission, Transmission$Transmission.Group=="Other Soap")
```

```
Other_soap<-Other_soap[c(1:3),] # Yes
```

```
Other_soap$Num_Estimate<-as.numeric(Other_soap$Num_Estimate)
```

```
Other_soap$logOR<-log(Other_soap$Num_Estimate)
```

```
Other_soap$Num_lb<-as.numeric(Other_soap$Num_lb)
```

```
Other_soap$loglb<-log(Other_soap$Num_lb)
```

```
Other_soap$Num_ub<-as.numeric(Other_soap$Num_ub)
```

```
Other_soap$logub<-log(Other_soap$Num_ub)
```

```
Other_soap$diflogCI<- Other_soap$logub-Other_soap$loglb
```

```
Other_soap$logSE<-Other_soap$diflogCI/3.92
```

```
OR.soap<-rma(yi = (Other_soap$logOR) , sei = (Other_soap$logSE), method = "ML",measure = "OR")
```

```
summary(OR.soap) #1 is body use instead of hand, change here
```

```
veggies<-subset(Transmission, Transmission$Transmission.Group=="Vegetables-> human") # No
```

```
water_to_plant<-subset(Transmission, Transmission$Transmission.Group=="Water-> Plant") # No
```

```
# Cases per day meta-analysis
```

```
#view(Casesperday)
```

```
# Check time line occupational exposure
```

```
Occupational_exp_or<-subset(Occupational_Exposure,  
Occupational_Exposure$Method.of.estimation=="OR")
```

```
Occupational_exp_risk<-subset(Occupational_Exposure,  
Occupational_Exposure$Method.of.estimation=="Risk")
```

```
Occupational_exp_genes<-subset(Occupational_Exposure,  
Occupational_Exposure$Method.of.estimation=="Genes")
```

```
Occupational_exp_PR<-subset(Occupational_Exposure,  
Occupational_Exposure$Method.of.estimation=="PR")
```

```
# Now we are gonna create a table of all meta analysis
```

```
# This code will not work if you deleted or added new meta analysis
```

```
# Then you will also have to add them in the way this table is created
```

```
##### Table creation
```

```
TransmissionRoute<-c("Animal to Air", "Poultry to Air", "Pig to Air", "", "Cattle to Air", "Animal to  
Animal", "Pet to Pet", "Pig to Pig", "Animal to Environment", "Poultry to Environment", "Pig to  
Environment", "Breast feeding",
```

```
    "", "", "", "", "Contact with an Infected Person", "", "", "", "", "", "", "", "", "", "", "",  
    "Eating meat to human", "White", "Red", "General", "Red",
```

```
    "Family member colonised", "", "", "", "", "", "",  
    "Family member occupational exposure", "Farming", "Hospital",
```

```
    "Human to nearby Environment", "", "", "", "",  
    "Livestock to drinking water", "Cattle", "Pig", "Poultry",
```

```
    "Mother to Child", "", "", "",  
    "Occupational Exposure", "Cattle", "Pig", "", "", "", "", "", "#",  
    "Poultry", "#",
```

```
    "", "Veterinarian", "",  
    "Pet to human", "", "", "", "", "horse", "Space sharing",
```

```
    "Travelling", "South Asia", "", "", "", "", "South East Asia", "", "Western Asia", "", "Central  
& East Asia", "Asia unspecified", "", "",  
    "Latin America", "", "", "America", "Africa", "", "", "Europe", "", "", "Animal mother to  
baby animal", "Showering daily", "Antibacterial soap",  
    "Family member colonized T", "Family member colonized R", "Family member colonised  
E coli risk")
```

```
Pathogen<-c(" ", "E.coli", "E.coli", "S. Aureus", "S. Aureus", " ", "S. pseudintermedius", "S. aureus", " ",  
"E. coli", "E.coli", "", "E. coli", "Enterobacteriaceae", "S. aureus", "S. pneumoniae",
```

```
    "", "E.coli", "S. Aureus", "S. Aureus", "S. Aureus", "S. Aureus", "S. Aureus", "VRE", "A.  
Baumannii", "A. Baumannii", "P. Aeruginosa", "P. Aeruginosa", "S. epidermidis",
```

```
    "", "E. coli", "E. coli", "E. coli", "E.coli", "", "E.Coli", "Enterobacteriaceae", "S. Aureus", "S.  
aureus", "S. aureus", "P.aeruginose", "", "S. Aureus", "S. Aureus",
```

"" , "S. Aureus" , "VRE" , "A. baumannii" , "A. calcoaceticus" , "" , "E. coli" , "E. coli" , "E. coli" , "" , "S. Aureus" , "S. Aureus" , "Group B Streptococci" ,

"" , "S. Aureus" , "Enterobacteriaceae" , "S. Aureus" , "" , "" , "" , "Staphylococci" , #"" ,

"E. coli" , "S. Aureus" , #"" ,

"S. Aureus" , "" ,

"" , "E. coli" , "S. Aureus" , "S. Aureus" , "Staphylococci" , "S. Aureus" , "Enterobacteria" ,

"" , "S. aureus" , "E. coli" , "E. coli" , "Enterobacteriaceae" , "Enterobacteriaceae" ,

"Enterobacteriaceae" , "Enterobacteriaceae" ,

"Enterobacteriaceae" , "Enterobacteriaceae" ,

"Enterobacteriaceae" ,

"E. coli" , "Enterobacteriaceae" , "Enterobacteriaceae" ,

"E. coli" , "Enterobacteriaceae" , "Enterobacteriaceae" ,

"Enterobacteriaceae" ,

"E. coli" , "Enterobacteriaceae" , "Enterobacteriaceae" ,

"E. coli" , "Enterobacteriaceae" , "Enterobacteriaceae" ,

"Staphylococcus pseudintermedius" ,

"S. aureus" ,

"S. aureus" ,

"S. aureus" , "E. coli" , "E. coli")

MethodofEstimation<- c( "" , "Risk" , "Risk" , "Risk" , "Risk" , " " , "Risk" , "R0" , " " , "Risk" , "Risk" , "" , "OR" , "OR" , "Genes" , "OR" , "" ,

"Risk" , "Genes" , "OR" , "R0" , "Risk" , "RR" , "Risk" , "OR" , "Risk" , "Risk" , "Genes" , "Risk" , "" , "OR" , "OR" , "OR" , "PR" ,

"" , "OR" , "PR" , "OR" , "Risk" , "Genes" , "Genes" , "" , "OR" , "OR" ,

"" , "Risk" , "Risk" , "Risk" , "Risk" , "" , "OR" , "OR" , "OR" , "" , "OR" , "Risk" , "Risk" ,

"" , "OR" , "Risk" , "OR" , "PR" , "Risk" , "Genes" , "Risk" , # "PR" ,

"OR" , # "OR" ,

"PR" , "OR" , "Risk" ,

"" , "OR" , "Risk" , "Genes" , "OR" , "Genes" , "OR" ,

"" , "OR" , "OR" , "Risk" , "OR" , "Risk" ,

"OR" , "Risk" ,

```

"OR", "Risk",
"Risk",
"Risk", "OR", "Risk",
"Risk", "OR", "Risk",
"OR",
"Risk", "OR", "Risk",
"Risk", "OR", "Risk",
"Genes",
"OR",
"OR",
"Genes", "Genes",
"Risk")

```

```

Random_effects<-round((c(1/(1+exp(-model.AtoA_EcoliRisk_poultry@beta)), 1/(1+exp(-
model.pig_to_air_Ecoli_Risk@beta)), 1/(1+exp(-model.pig_to_air_Saureus_Risk@beta)), 1/(1+exp(-
model.cattle.to.air.risk@beta))))),3)

```

```

Random_effects<-c("", Random_effects, "", round((c(1/(1+exp(-
model.pet_to_pet_speudo.risk@beta)), exp(r0.animalanimal$beta))))),3))

```

```

Random_effects<-c(Random_effects, "", round((c(1/(1+exp(-
model.poultry_to_env@beta)), 1/(1+exp(-model.pig_to_env@beta))))),3), "",

```

```

round((c(exp(or.breastf$beta), exp(or.breastf_entero$beta), 1/(1+exp(-
model.breast.areus@beta)), exp(or.breastf_spneumo$beta))))),3), "",

```

```

round((c(1/(1+exp(-model.cont.inf.ecoli_risk@beta)), #1/(1+exp(-
model.cont.inf.entero@beta)),

```

```

1/(1+exp(-model.cont.inf.saureus_genes@beta)),
exp(or.cont.inf.saureus$beta), exp(r0.cont.inf.saureus$beta), 1/(1+exp(-
model.cont.inf.saureus_Risk@beta)), exp(rr.contact.inf.saureus$beta),

```

```

1/(1+exp(-model.cont.inf.vre_Risk@beta)), exp(or.cont.inf.abau$beta), 1/(1+exp(-
model.cont.inf.abau_Risk@beta)),

```

```

1/(1+exp(-model.cont.inf.pau@beta)), 1/(1+exp(-model.cont.inf.pau.genes@beta)),
1/(1+exp(-model.cont.inf.epi.risk@beta))))),3), "",

```

```

round(c(exp(or.white$beta), exp(or.red$beta), exp(or.general$beta),
exp(pr.redmeat$beta)),3), "", round(c(exp(or.fam.mem.col.ecoli$beta),
exp(pr.fam.mem.col.enter$beta), exp(or.fam.mem.col.saureus$beta), 1/(1+exp(-
model.fam_col_sau_risk@beta)), 1/(1+exp(-model.fam_col_sau_genes@beta)), 1/(1+exp(-
model.fam.pau.genes@beta))))),3), "",

```

$\text{round}(c(\exp(\text{or.fam.occu.farm}\beta), \exp(\text{or.fam.occu.hosp}\beta)), 3),$   
 $""$ ,  $\text{round}(c(1/(1+\exp(-\text{model.humantonearenv.saureus.risk@}\beta)), 1/(1+\exp(-$   
 $\text{model.humantonearenv.VRE.risk@}\beta)), 1/(1+\exp(-$   
 $\text{model.humantonearenv.abau.risk@}\beta)), 1/(1+\exp(-\text{model.humantonearenv.acalco.risk@}\beta))), 3),$   
 $""$ ,  
 $\text{round}(c(\exp(\text{or.livedrink\_cattle}\beta), \exp(\text{or.livedrink\_pig}\beta),$   
 $\exp(\text{or.livedrink\_poultry}\beta)), 3), ""$ ,  
 $\text{round}(c(\exp(\text{or.mother.to.child}\beta), 1/(1+\exp(-$   
 $\text{model.mother.to.child.risk@}\beta)), 1/(1+\exp(-\text{model.mother.to.child.risk.GB@}\beta))), 3), ""$ ,  
 $\text{round}(c(\exp(\text{or.occu.exp.cattle.saureus}\beta), 1/(1+\exp(-$   
 $\text{model.occu.exp.pig.entero@}\beta)), \exp(\text{or.occu.exp.pig.saureus}\beta),$   
 $\exp(\text{pr.occu.exp.saureus.pig}\beta),$   
 $1/(1+\exp(-\text{model.occu.exp.pig.saureus@}\beta)), 1/(1+\exp(-$   
 $\text{model.occu.exp.genes.saureus.pig@}\beta)), 1/(1+\exp(-\text{model.occu.exp.staph.risk.pig@}\beta)),$   
 $\#\exp(\text{pr.occu.exp.staph.pig}\beta),$   
 $\exp(\text{or.occu.exp.poultry}\beta), \#\exp(\text{or.occu.exp.poultry.saureus}\beta),$   
 $\exp(\text{pr.occu.exp.saureus.poultry}\beta), \exp(\text{or.occu.exp.vets.sarues}\beta), 1/(1+\exp(-$   
 $\text{model.occu.exp.vet.risk@}\beta))), 3), ""$ ,  
 $\text{round}(c(\exp(\text{OR.pet.tp.human.ecoli}\beta), 1/(1+\exp(-$   
 $\text{model.risk.pethuman.saureus@}\beta)), 1/(1+\exp(-\text{modelGenes\_Pet\_to\_human\_saureus@}\beta))$   
 $, \exp(\text{OR.pet.tp.human.staph}\beta), 1/(1+\exp(-\text{modelGenes\_Pet\_to\_human\_saureus\_horse@}\beta))),$   
 $\exp(\text{OR.sharingroom.or}\beta)), 3), ""$ ,  
 $\text{round}(c(\exp(\text{OR.travel\_SA\_SAreus}\beta), \exp(\text{OR.travel\_SA\_Ecoli}\beta), 1/(1+\exp(-$   
 $\text{model.risk.travel.SA.ecoli@}\beta)), \exp(\text{OR.travel\_SA\_Entero}\beta), 1/(1+\exp(-$   
 $\text{model.risk.travel.SA.entero@}\beta)),$   
 $\exp(\text{OR.travel\_SEA\_Entero}\beta), 1/(1+\exp(-\text{model.risk.travel.SEA.entero@}\beta)),$   
 $\exp(\text{OR.travel\_WA\_entero}\beta), 1/(1+\exp(-\text{model.risk.travel.wa.entero@}\beta)),$   
 $1/(1+\exp(-\text{model.risk.travel.centraleast.entero@}\beta)),$   
 $1/(1+\exp(-\text{model.risk.travel.asia.ecoli@}\beta)),$   
 $\exp(\text{OR.travel\_Asia\_entero}\beta), 1/(1+\exp(-\text{model.risk.travel.asia.entero@}\beta)),$   
 $1/(1+\exp(-\text{model.risk.travel.ecoli.LA@}\beta)), \exp(\text{OR.travel\_LA\_entero}\beta),$   
 $1/(1+\exp(-\text{model.risk.travel.LA\_enter@}\beta)),$   
 $\exp(\text{OR.travel\_Amerika\_enter}\beta),$   
 $1/(1+\exp(-\text{model.risk.travel.africa.ecoli@}\beta)), \exp(\text{OR.travel\_Africa\_enter}\beta),$   
 $1/(1+\exp(-\text{model.risk.travel.africa.entero@}\beta)),$   
 $1/(1+\exp(-\text{model.risk.travel.eu.ecoli@}\beta)), \exp(\text{OR.travel\_Europe\_entero}\beta),$   
 $1/(1+\exp(-\text{model.risk.travel.entero.eu@}\beta)),$   
 $1/(1+\exp(-\text{modelGenes\_motheranimal\_to\_baby@}\beta)),$

```

exp(OR.bathingshowering$beta), exp(OR.soap$beta),
1/(1+exp(-(model.fam_col_sau_genes_T@beta))),
1/(1+exp(-(model.Fam_col_ecoli_genes@beta))),
1/(1+exp(-(model.Family_member_colonised_ecoli_risk@beta))),3))

```

```

LowerBR<-round(c(1/(1+exp(-(model.AtoA_EcoliRisk_poultry@beta-1.96*se.logit.AtoApoultry@x))),
1/(1+exp(-(model.pig_to_air_Ecoli_Risk@beta-1.96*se.logit.AtoApig@x))), 1/(1+exp(-
(model.pig_to_air_Saureus_Risk@beta-1.96*se.logit.AtoApigAreus@x))),1/(1+exp(-
(model.cattle.to.air.risk@beta-1.96*se.logit.AtoAcattle@x))))),3)

```

```

LowerBR<-c("", LowerBR, " ", round(c(1/(1+exp(-(model.pet_to_pet_speudo.risk@beta-
1.96*se.logit.pet.Spseudo@x))), exp(r0.animalanimal$ci.lb))),3))

```

```

LowerBR<-c(LowerBR, " ", round(c(1/(1+exp(-(model.poultry_to_env@beta-
1.96*se.logit.poultry_env@x))), 1/(1+exp(-(model.pig_to_env@beta-1.96*se.logit.pig_env@x))))),3),
"",

```

```

round(c(exp(or.breastf$ci.lb), exp(or.breastf_entero$ci.lb),1/(1+exp(-
(model.breast.areas@beta-1.96*se.logit.breast@x))), exp(or.breastf_spneumo$ci.lb))),3), "",

```

```

round((c(1/(1+exp(-(model.cont.inf.ecoli_risk@beta-1.96*se.logit.cont.inf.ecoli.risk@x))),
#1/(1+exp(-(model.cont.inf.entero@beta-1.96*se.logit.cont.inf.entero@x))),
1/(1+exp(-(model.cont.inf.saureus_genes@beta-
1.96*se.logit.cont.inf.saureus_genes@x))),

```

```

exp(or.cont.inf.saureus$ci.lb),exp(r0.cont.inf.saureus$ci.lb), 1/(1+exp(-
(model.cont.inf.saureus_Risk@beta-1.96*se.logit.cont.inf.saureus.Risk@x))),
exp(rr.contact.inf.saureus$ci.lb),1/(1+exp(-(model.cont.inf.vre_Risk@beta-
1.96*se.logit.cont.inf.vre.Risk@x))),

```

```

exp(or.cont.inf.abau$ci.lb), 1/(1+exp(-(model.cont.inf.abau_Risk@beta-
1.96*se.logit.cont.inf.abau@x))),1/(1+exp(-(model.cont.inf.pau@beta-
1.96*se.logit.cont.inf.pau@x))),

```

```

1/(1+exp(-(model.cont.inf.pau_genes@beta-1.96*se.logit.cont.inf.pau_genes@x))),
1/(1+exp(-(model.cont.inf.epi.risk@beta-1.96*se.logit.cont.inf.epi.risk@x))))),3), "",

```

```

round(c(exp(or.white$ci.lb),exp(or.red$ci.lb),exp(or.general$ci.lb),
exp(pr.meat_ecoli$ci.lb)),3), "", round(c(exp(or.fam.mem.col.ecoli$ci.lb),
exp(pr.fam.mem.col.enter$ci.lb), exp(or.fam.mem.col.saureus$ci.lb),1/(1+exp(-
(model.fam_col_sau_risk@beta-1.96*se.logit.fam_col_sau_risk@x))), 1/(1+exp(-
(model.fam_col_sau_genes@beta-1.96*se.logit.fam_col_sau_genes@x))),1/(1+exp(-
(model.fam.pau_genes@beta-1.96*se.logit.fam.pau_genes@x))))),3), "",

```

```

round(c(exp(or.fam.occu.farm$ci.lb), exp(or.fam.occu.hosp$ci.lb)),3), "",

```

```

round(c(1/(1+exp(-(model.humantonearenav.saureus.risk@beta-
1.96*se.logithumantonearenav.saureus.risk@x))),1/(1+exp(-(model.humantonearenav.VRE.risk@beta-

```

$1.96 * se.logit.humantonearenv.VRE.risk@x)), 1/(1+exp(-(model.humantonearenv.abau.risk@beta-1.96 * se.logit.humantonearenv.abau.risk@x))), 1/(1+exp(-(model.humantonearenv.acalco.risk@beta-1.96 * se.logit.humantonearenv.acalco.risk@x))), 3, ""$ ,

$round(c( exp(or.livedrink_cattle$ci.lb), exp(or.livedrink_pig$ci.lb), exp(or.livedrink_poultry$ci.lb)), 3, ""$ ,

$round(c(exp(or.mother.to.child$ci.lb), 1/(1+exp(-(model.mother.to.child.risk@beta-1.96 * se.logit.mother.to.child@x))), 1/(1+exp(-(model.mother.to.child.risk.GB@beta-1.96 * se.logit.mother.to.child.GB@x))), 3, ""$ ,

$round(c(exp(or.occu.exp.cattle.saureus$ci.lb), 1/(1+exp(-(model.occu.exp.pig.entero@beta-1.96 * se.logit.occu.exp.pig.entero@x))), exp(or.occu.exp.pig.saureus$ci.lb), exp(pr.occu.exp.saureus.pig$ci.lb),$

$1/(1+exp(-(model.occu.exp.pig.saureus@beta-1.96 * se.logit.occu.exp.pig.saureus@x))), 1/(1+exp(-(model.occu.exp.genes.saureus.pig@beta-1.96 * se.logit.occu.exp.genes.saureus.pig@x))), 1/(1+exp(-(model.occu.exp.staph.risk.pig@beta-1.96 * se.logit.occu.exp.staph.risk.pig@x))), #exp(pr.occu.exp.staph.pig$ci.lb),$

$exp(or.occu.exp.poultry$ci.lb) , #exp(or.occu.exp.poultry.saureus$ci.lb),$

$exp(pr.occu.exp.saureus.poultry$ci.lb), exp(or.occu.exp.vets.sarues$ci.lb), 1/(1+exp(-(model.occu.exp.vet.risk@beta-1.96 * se.logit.occu.exp.vet.risk@x))), 3, ""$ ,

$round(c(exp(OR.pet.tp.human.ecoli$ci.lb), 1/(1+exp(-(model.risk.pethuman.saureus@beta-1.96 * se.logit.risk.pethuman.saureus@x))), 1/(1+exp(-(modelGenes_Pet_to_human_saureus@beta-1.96 * se.logitGenes_Pet_to_human_saureus@x))), exp(OR.pet.tp.human.staph$ci.lb), 1/(1+exp(-(modelGenes_Pet_to_human_saureus_horse@beta-1.96 * se.logitGenes_Pet_to_human_saureus_horse@x))), exp(OR.sharingroom.or$ci.lb)), 3, ""$ ,

$round(c(exp(OR.travel_SA_SAReus$ci.lb), exp(OR.travel_SA_Ecoli$ci.lb), 1/(1+exp(-(model.risk.travel.SA.ecoli@beta-1.96 * se.logit.risk.travel.SA.ecoli@x))), exp(OR.travel_SA_Enterо$ci.lb), 1/(1+exp(-(model.risk.travel.SA.entero@beta-1.96 * se.logit.risk.travel.SA.entero@x))),$

$exp(OR.travel_SEA_Enterо$ci.lb), 1/(1+exp(-(model.risk.travel.SEA.entero@beta-1.96 * se.logit.risk.travel.SEA.entero@x))),$

$exp(OR.travel_WA_enterо$ci.lb), 1/(1+exp(-(model.risk.travel.wa.entero@beta-1.96 * se.logit.risk.travel.wa.entero@x))),$

$1/(1+exp(-(model.risk.travel.centraleast.entero@beta-1.96 * se.logit.risk.travel.centraleast.entero@x))),$

$1/(1+exp(-(model.risk.travel.asia.ecoli@beta-1.96 * se.logit.risk.travel.asia.ecoli@x))), exp(OR.travel_Asia_enterо$ci.lb), 1/(1+exp(-(model.risk.travel.asia.entero@beta-1.96 * se.logit.risk.travel.asia.entero@x))),$

$1/(1+exp(-(model.risk.travel.ecoli.LA@beta-1.96 * se.logit.model.risk.travel.ecoli.LA@x))), exp(OR.travel_LA_enterо$ci.lb), 1/(1+exp(-(model.risk.travel.LA_enter@beta-1.96 * se.logit.risk.travel.LA_enter@x))),$

$exp(OR.travel_Amerika_enter$ci.lb),$

$1/(1+\exp(-(\text{model.risk.travel.africa.ecoli@beta}-1.96*\text{se.logit.risk.travel.africa.ecoli@x}))),$   
 $\exp(\text{OR.travel\_Africa\_entero}\$ci.lb), 1/(1+\exp(-(\text{model.risk.travel.africa.entero@beta}-$   
 $1.96*\text{se.logit.risk.travel.africa.entero@x}))),$

$1/(1+\exp(-(\text{model.risk.travel.eu.ecoli@beta}-$   
 $1.96*\text{se.logit.risk.travel.eu.ecoli@x}))),\exp(\text{OR.travel\_Europe\_entero}\$ci.lb), 1/(1+\exp(-$   
 $(\text{model.risk.travel.entero.eu@beta}-1.96*\text{se.logit.risk.travel.entero.eu@x}))),$

$1/(1+\exp(-(\text{modelGenes\_motheranimal\_to\_baby@beta}-$   
 $1.96*\text{se.logitGenes\_motheranimal\_to\_baby@x}))),$

$\exp(\text{OR.bathingshowering}\$ci.lb), \exp(\text{OR.soap}\$ci.lb),$

$1/(1+\exp(-(\text{model.fam\_col\_sau\_genes\_T@beta}-1.96*\text{se.logit.fam\_col\_sau\_genes\_T@x}))),$

$1/(1+\exp(-(\text{model.Fam\_col\_ecoli\_genes@beta}-1.96*\text{se.logit.Fam\_col\_ecoli\_genes@x}))),$

$1/(1+\exp(-(\text{model.Family\_member\_colonised\_ecoli\_risk@beta}-$   
 $1.96*\text{se.logit.Family\_member\_colonised\_ecoli\_risk@x}))))),3))$

$\text{UpperBR}<-round(c(1/(1+\exp(-(\text{model.AtoA\_EcoliRisk\_poultry@beta}+1.96*\text{se.logit.AtoApoultry@x}))),$   
 $1/(1+\exp(-(\text{model.pig\_to\_air\_Ecoli\_Risk@beta}+1.96*\text{se.logit.AtoApig@x}))), 1/(1+\exp(-$   
 $(\text{model.pig\_to\_air\_Saureus\_Risk@beta}+1.96*\text{se.logit.AtoApigAreus@x}))),1/(1+\exp(-$   
 $(\text{model.cattle.to.air.risk@beta}+1.96*\text{se.logit.AtoAcattle@x}))))),3)$

$\text{UpperBR}<-c(" ", \text{UpperBR}, "", round(c(1/(1+\exp(-$   
 $(\text{model.pet\_to\_pet\_spseudo.risk@beta}+1.96*\text{se.logit.pet.Spseudo@x}))),$   
 $\exp(r0.animalanimal\$ci.ub))),3))$

$\text{UpperBR}<-c(\text{UpperBR}, " ", round(c(1/(1+\exp(-$   
 $(\text{model.poultry\_to\_env@beta}+1.96*\text{se.logit.poultry\_env@x}))), 1/(1+\exp(-$   
 $(\text{model.pig\_to\_env@beta}+1.96*\text{se.logit.pig\_env@x}))))),3), "",$

$round(c(\exp(\text{or.breastf}\$ci.ub), \exp(\text{or.breastf\_entero}\$ci.ub),1/(1+\exp(-$   
 $(\text{model.breast.areus@beta}+1.96*\text{se.logit.breast@x}))), \exp(\text{or.breastf\_spneumo}\$ci.ub))),3), "",$

$round((c(1/(1+\exp(-(\text{model.cont.inf.ecoli\_risk@beta}+1.96*\text{se.logit.cont.inf.ecoli.risk@x}))),$

$\#1/(1+\exp(-(\text{model.cont.inf.entero@beta}+1.96*\text{se.logit.cont.inf.entero@x}))),$

$1/(1+\exp(-$   
 $(\text{model.cont.inf.saureus\_genes@beta}+1.96*\text{se.logit.cont.inf.saureus.genes@x}))),$

$\exp(\text{or.cont.inf.saureus}\$ci.ub), \exp(r0.cont.inf.saureus\$ci.ub),1/(1+\exp(-$   
 $(\text{model.cont.inf.saureus\_Risk@beta}+1.96*\text{se.logit.cont.inf.saureus.Risk@x}))),$   
 $\exp(\text{rr.contact.inf.saureus}\$ci.ub),1/(1+\exp(-$   
 $(\text{model.cont.inf.vre\_Risk@beta}+1.96*\text{se.logit.cont.inf.vre.Risk@x}))),$

$\exp(\text{or.cont.inf.abau}\$ci.ub), 1/(1+\exp(-$   
 $(\text{model.cont.inf.abau\_Risk@beta}+1.96*\text{se.logit.cont.inf.abau@x}))),1/(1+\exp(-$   
 $(\text{model.cont.inf.pau@beta}+1.96*\text{se.logit.cont.inf.pau@x}))),$



$1/(1+\exp(-(\text{model.cont.inf.pau.genes@beta}+1.96*\text{se.logit.cont.inf.pau.genes@x}))),$   
 $1/(1+\exp(-(\text{model.cont.inf.epi.risk@beta}+1.96*\text{se.logit.cont.inf.epi.risk@x}))))),3), ""$ ,

$\text{round}(c(\exp(\text{or.white}\$ci.ub),\exp(\text{or.red}\$ci.ub),\exp(\text{or.general}\$ci.ub),$   
 $\exp(\text{pr.meat\_ecoli}\$ci.ub)),3), ""$ ,  $\text{round}(c(\exp(\text{or.fam.mem.col.ecoli}\$ci.ub),$   
 $\exp(\text{pr.fam.mem.col.enter}\$ci.ub), \exp(\text{or.fam.mem.col.saureus}\$ci.ub),1/(1+\exp(-$   
 $(\text{model.fam\_col\_sau\_risk@beta}+1.96*\text{se.logit.fam\_col\_sau\_risk@x}))),1/(1+\exp(-$   
 $(\text{model.fam\_col\_sau\_genes@beta}+1.96*\text{se.logit.fam\_col\_sau\_genes@x}))),1/(1+\exp(-$   
 $(\text{model.fam.pau.genes@beta}+1.96*\text{se.logit.fam.pau.genes@x}))))),3), ""$ ,

$\text{round}(c(\exp(\text{or.fam.occu.farm}\$ci.ub), \exp(\text{or.fam.occu.hosp}\$ci.ub)),3), ""$ ,

$\text{round}(c(1/(1+\exp(-$   
 $(\text{model.humantonearenav.saureus.risk@beta}+1.96*\text{se.logithumantonearenav.saureus.risk@x}))),1/(1+\exp(-$   
 $\exp(-(\text{model.humantonearenav.VRE.risk@beta}+1.96*\text{se.logithumantonearenav.VRE.risk@x}))),1/(1+\exp(-$   
 $(\text{model.humantonearenav.abau.risk@beta}+1.96*\text{se.logithumantonearenav.abau.risk@x}))),1/(1+\exp(-$   
 $(\text{model.humantonearenav.acalco.risk@beta}+1.96*\text{se.logithumantonearenav.acalco.risk@x}))))),3), ""$ ,

$\text{round}(c(\exp(\text{or.livedrink\_cattle}\$ci.ub), \exp(\text{or.livedrink\_pig}\$ci.ub),$   
 $\exp(\text{or.livedrink\_poultry}\$ci.ub)),3), ""$ ,

$\text{round}(c(\exp(\text{or.mother.to.child}\$ci.ub), 1/(1+\exp(-$   
 $(\text{model.mother.to.child.risk@beta}+1.96*\text{se.logit.mother.to.child@x}))), 1/(1+\exp(-$   
 $(\text{model.mother.to.child.risk.GB@beta}+1.96*\text{se.logit.mother.to.child.GB@x}))))),3), ""$ ,

$\text{round}(c(\exp(\text{or.occu.exp.cattle.saureus}\$ci.ub), 1/(1+\exp(-$   
 $(\text{model.occu.exp.pig.entero@beta}+1.96*\text{se.logit.occu.exp.pig.entero@x}))),$   
 $\exp(\text{or.occu.exp.pig.saureus}\$ci.ub), \exp(\text{pr.occu.exp.saureus.pig}\$ci.ub),$   
 $1/(1+\exp(-(\text{model.occu.exp.pig.saureus@beta}+1.96*\text{se.logit.occu.exp.pig.saureus@x}))),$   
 $1/(1+\exp(-$   
 $(\text{model.occu.exp.genes.saureus.pig@beta}+1.96*\text{se.logit.occu.exp.genes.saureus.pig@x}))),1/(1+\exp(-$   
 $(\text{model.occu.exp.staph.risk.pig@beta}+1.96*\text{se.logit.occu.exp.staph.risk.pig@x}))),$   
 $\#\exp(\text{pr.occu.exp.staph.pig}\$ci.ub),$   
 $\exp(\text{or.occu.exp.poultry}\$ci.ub),\#\exp(\text{or.occu.exp.poultry.saureus}\$ci.ub),$   
 $\exp(\text{pr.occu.exp.saureus.poultry}\$ci.ub), \exp(\text{or.occu.exp.vets.sarues}\$ci.ub), 1/(1+\exp(-$   
 $(\text{model.occu.exp.vet.risk@beta}+1.96*\text{se.logit.occu.exp.vet.risk@x}))))),3), ""$ ,

$\text{round}(c(\exp(\text{OR.pet.tp.human.ecoli}\$ci.ub),1/(1+\exp(-$   
 $(\text{model.risk.pethuman.saureus@beta}+1.96*\text{se.logit.risk.pethuman.saureus@x}))), 1/(1+\exp(-$   
 $(\text{modelGenes\_Pet\_to\_human\_saureus@beta}+1.96*\text{se.logitGenes\_Pet\_to\_human\_saureus@x}))),\exp$   
 $(\text{OR.pet.tp.human.staph}\$ci.ub),1/(1+\exp(-$   
 $(\text{modelGenes\_Pet\_to\_human\_saureus\_horse@beta}+1.96*\text{se.logitGenes\_Pet\_to\_human\_saureus\_h$   
 $orse@x}))), \exp(\text{OR.sharingroom.or}\$ci.ub)),3), ""$ ,

$\text{round}(c(\exp(\text{OR.travel\_SA\_SAreus}\$ci.ub), \exp(\text{OR.travel\_SA\_Ecoli}\$ci.ub), 1/(1+\exp(-$   
 $(\text{model.risk.travel.SA.ecoli@beta}+1.96*\text{se.logit.risk.travel.SA.ecoli@x}))),$   
 $\exp(\text{OR.travel\_SA\_Enter}\$ci.ub), 1/(1+\exp(-$   
 $(\text{model.risk.travel.SA.entero@beta}+1.96*\text{se.logit.risk.travel.SA.entero@x}))),$

```

exp(OR.travel_SEA_Enterо$ci.ub), 1/(1+exp(-
(model.risk.travel.SEA.enterо@beta+1.96*se.logit.risk.travel.SEA.enterо@x))),

exp(OR.travel_WA_enterо$ci.ub), 1/(1+exp(-
(model.risk.travel.wa.enterо@beta+1.96*se.logit.risk.travel.wa.enterо@x))),

1/(1+exp(-
(model.risk.travel.centraleast.enterо@beta+1.96*se.logit.risk.travel.centraleast.enterо@x))),

1/(1+exp(-(model.risk.travel.asia.ecoli@beta+1.96*se.logit.risk.travel.asia.ecoli@x))),
exp(OR.travel_Asia_enterо$ci.ub),1/(1+exp(-
(model.risk.travel.asia.enterо@beta+1.96*se.logit.risk.travel.asia.enterо@x))),

1/(1+exp(-(model.risk.travel.ecoli.LA@beta+1.96*se.logit.model.risk.travel.ecoli.LA@x))),
exp(OR.travel_LA_enterо$ci.ub), 1/(1+exp(-
(model.risk.travel.LA_enterо@beta+1.96*se.logit.risk.travel.LA_enterо@x))),

exp(OR.travel_Amerika_enter$ci.ub),

1/(1+exp(-(model.risk.travel.africa.ecoli@beta+1.96*se.logit.risk.travel.africa.ecoli@x))),
exp(OR.travel_Africa_enter$ci.ub), 1/(1+exp(-
(model.risk.travel.africa.enterо@beta+1.96*se.logit.risk.travel.africa.enterо@x))),

1/(1+exp(-(model.risk.travel.eu.ecoli@beta+1.96*se.logit.risk.travel.eu.ecoli@x))),
exp(OR.travel_Europe_enterо$ci.ub), 1/(1+exp(-
(model.risk.travel.enterо.eu@beta+1.96*se.logit.risk.travel.enterо.eu@x))),

1/(1+exp(-
(modelGenes_motheranimal_to_baby@beta+1.96*se.logitGenes_motheranimal_to_baby@x))),

exp(OR.bathingshowering$ci.ub), exp(OR.soap$ci.ub),

1/(1+exp(-(model.fam_col_sau_genes_T@beta+1.96*se.logit.fam_col_sau_genes_T@x))),

1/(1+exp(-(model.Fam_col_ecoli_genes@beta+1.96*se.logit.Fam_col_ecoli_genes@x))),

1/(1+exp(-
(model.Family_member_colonised_ecoli_risk@beta+1.96*se.logit.Family_member_colonised_ecoli_
risk@x))),3))

```

```

tabel_meta<-data.frame("Transmission Route"=TransmissionRoute, "Pathogen"=Pathogen, "Method
of Estimation"= MethodofEstimation, "Random Effect"=Random_effects, "95CI Lower
Bound"=LowerBR, "95CI Upper bound"=UpperBR)

```

```

tabel_meta

```

```

#tabel_meta$Random.Effect<-as.numeric(tabel_meta$Random.Effect)

```

```

#tabel_meta$Random.Effect<-round(tabel_meta$Random.Effect, digits=2)

```

```

#tabel_meta$X95CI.Lower.Bound<-as.numeric(tabel_meta$X95CI.Lower.Bound)

```

```

#tabel_meta$X95CI.Lower.Bound<-round(tabel_meta$X95CI.Lower.Bound, digits=2)

```

```

#tabel_meta$X95CI.Upper.bound<-as.numeric(tabel_meta$X95CI.Upper.bound)
#tabel_meta$X95CI.Upper.bound<-round(tabel_meta$X95CI.Upper.bound, digits=2)
# Rounding for in paper

write.xlsx(tabel_meta, "PATH TO YOUR PC/Data meta03022021.xlsx")
# Replace "PATH TO YOUR PC" with the location you want to save the data in.
#WATCH OUT! If you want to run the forest plot script, do not run the underneath "rm" part

# Clean up environment leaving only the dataset

rm(Random_effects, LowerBR, UpperBR)

rm(model.AtoA_EcoliRisk_poultry, model.pig_to_air_Ecoli_Risk, model.poultry_to_env,
model.pig_to_air_Saureus_Risk, model.cattle.to.air.risk,

  model.pet_to_pet_speudo.risk, model.pig_to_env, or.breastf, or.breastf_entero,
model.breast.areus, or.breastf_spneumo,

  model.cont.inf.ecoli_risk,
model.cont.inf.saureus_genes,model.cont.inf.saureus_Risk,model.cont.inf.abau_Risk,
model.cont.inf.vre_Risk,

  model.cont.inf.epi.risk, model.cont.inf.pau, model.cont.inf.pau.genes, Travelling,
Travelling_OR_Ecoli, Travelling_OR_Ecoli_SA, Travelling_OR_Saereus,

  Travelling_OR_Enterо, Travelling_OR_Enterо_Africa, Travelling_OR_Enterо_America,
Travelling_OR_Enterо_Asia_unsp,

  Travelling_OR_Enterо_Europe, Travelling_OR_Enterо_LatinAmerica, Travelling_OR_Enterо_SA,
Travelling_OR_Enterо_SEA, Travelling_OR_Enterо_WA, Travelling_Risk_entero_WA,
Travelling_Risk_entero_SEA,

  Travelling_Risk_entero_SA, Travelling_Risk_entero_LA, Travelling_Risk_entero_EU,
Travelling_Risk_entero_CentralEastA, Travelling_Risk_entero_Asia_unspec,
Travelling_Risk_entero_africa,

  Travelling_Risk_entero, Travelling_Risk_ecoli_LA, Travelling_Risk_ecoli_eu,
Travelling_Risk_ecoli_Asia_un, Travelling_Risk_ecoli_Africa, Travelling_Risk_ecoli,
Travelling_OR_saures_South_asia,

  Travelling_PR, Travelling_Risk, Acquisition, Animal_contact, Animal_to_air,
Animal_to_air_Ecoli_Risk, Animal_to_air_Sareus_Risk, Animal_to_animal, Animal_to_environment,

  Animal_to_environment_Ecoli, aureus, BacterialIntake, breast_areus, Breast_feeding,
BreastF_ecoli, BreastF_ecoli_OR, animal_to_animal_Saurues, animal_to_animal_Saurues_r0,

```

BreastF\_spneumo\_OR, BreastF\_spneumo, BreastF\_entero\_OR, BreastF\_entero, Casesperday, chicken\_to\_chicken\_EColiTR, TRratio, whitemeat\_or, Travelling\_Risk\_ecoli\_SA, Table\_Modelling\_methods, Table\_Statistical\_methods,

air\_to\_animal, Animal\_animal\_risk\_other, Cattle\_to\_air\_Sareus\_Risk, cattle\_to\_cattle\_Saureus, Contact\_with\_infected, Contact\_with\_infected\_Abau\_OR, Contact\_with\_infected\_Abau\_Risk,

Cont\_Infeced\_ecoli\_Risk, Contact\_with\_infected\_VRE\_Risk, Contact\_with\_infected\_VRE\_R0, Contact\_with\_infected\_VRE, Contact\_with\_infected\_Saurues\_TR, Contact\_with\_infected\_Saurues\_RR,

Contact\_with\_infected\_Saurues\_Risk, Contact\_with\_infected\_Saurues\_OR, Contact\_with\_infected\_Saurues\_IOR, Contact\_with\_infected\_Saurues\_Genes, Contact\_with\_infected\_Saurues\_Cases,

Contact\_with\_infected\_paerug\_risk, Contact\_with\_infected\_paerug\_IOR, Contact\_with\_infected\_paerug\_genes, Contact\_with\_infected\_epi\_risk, Contact\_with\_infected\_Abau\_R0, Contact\_with\_infected\_Saurues\_r0,

Contaminated\_room, Contaminated\_room\_VRE, Eating\_meat, Eating\_meat\_E.coli\_OR, Eating\_meat\_E.coli\_PR, Fam\_col\_ecoli\_genes, Fam\_with\_infected\_paerug\_genes, Family\_member\_colonised,

Family\_member\_colonised\_ecoli\_OR, fam\_col\_sau\_genes, fam\_col\_sau\_genes\_T, fam\_col\_sau\_risk, environnement\_to\_human, Family\_member\_colonised\_ecoli\_risk, Family\_member\_colonised\_entero\_PR,

Family\_member\_colonised\_saureus\_OR, Family\_member\_occupational\_exposure\_VRE, Family\_member\_occupational\_exposure\_saureus\_hospital, Family\_member\_occupational\_exposure\_saureus\_farming, Family\_member\_occupational\_exposure\_saureus,

Family\_member\_occupational\_exposure, Genes, Genes\_motheranimal\_to\_baby, Genes\_Pet\_to\_human\_saureus, Genes\_Pet\_to\_human\_saureus\_horse, generalmeat\_or, human\_to\_air,

Human\_to\_nearbyenv, Human\_to\_nearbyenv\_abau\_Risk, Human\_to\_nearbyenv\_acalco\_Risk, Human\_to\_nearbyenv\_Saureus\_Risk, Human\_to\_nearbyenv\_VRE\_Risk,

food\_to\_animal, Incidence, Interventions, Incidence\_rate\_ratio, kiekje, Livestock\_to\_drinking\_water, Livestock\_to\_drinking\_water\_cattle, Livestock\_to\_drinking\_water\_pig,

Livestock\_to\_drinking\_water\_poultry, Modelling, modelGenes\_Pet\_to\_human\_saureus\_horse, modelGenes\_Pet\_to\_human\_saureus, modelGenes\_motheranimal\_to\_baby, model.risk.travel.wa.entero,

model.risk.travel.SEA.entero, model.risk.travel.SA.entero, model.risk.travel.SA.ecoli, model.risk.travel.LA\_enter, model.risk.travel.eu.ecoli, model.risk.travel.entero.eu, model.risk.travel.ecoli.LA,

model.risk.travel.centraleast.entero, model.risk.travel.asia.entero, model.risk.travel.asia.ecoli, model.risk.travel.africa.entero, model.risk.travel.africa.ecoli, model.risk.pethuman.saureus,

model.occu.exp.vet.risk, model.occu.exp.staph.risk.pig, model.occu.exp.pig.saureus,  
model.occu.exp.pig.entero, model.occu.exp.genes.saureus.pig, model.fam.pau.genes,  
model.Fam\_col\_ecoli\_genes, model.mother.to.child.risk, model.fam\_col\_sau\_genes,  
model.fam\_col\_sau\_genes\_T, model.humantonearenv.VRE.risk, model.fam\_col\_sau\_risk,  
model.Family\_member\_colonised\_ecoli\_risk,  
model.humantonearenv.abau.risk, model.humantonearenv.acalco.risk,  
model.humantonearenv.saureus.risk, model.mother.to.child.risk.GB,motheranimal\_to\_baby,  
Mother\_to\_child,  
Mother\_to\_child\_Aureus\_OR, Mother\_to\_child\_entero\_Risk, Mother\_to\_child\_groupB\_Risk,  
Mother\_to\_child\_Saureus\_Risk, Nearby\_env\_tohuman, Non\_commercial\_animal\_keeping,  
Occupational\_exp\_genes, Occupational\_exp\_or, Occupational\_exp\_PR, Occupational\_exp\_risk,  
Occupational\_Exposure, Occupational\_Exposure\_E.coli\_Genes,  
Occupational\_Exposure\_E.coli\_OR\_poultry,  
Occupational\_Exposure\_E.coli\_PR, Occupational\_Exposure\_E.coli\_Risk,  
Occupational\_Exposure\_Entero\_genes, Occupational\_Exposure\_Entero\_OR,  
Occupational\_Exposure\_Entero\_Risk,  
Occupational\_Exposure\_VRE, Occupational\_Exposure\_Staph\_pig\_risk,  
Occupational\_Exposure\_Staph\_pig\_PR, Occupational\_Exposure\_Staph,  
Occupational\_Exposure\_SAureus\_Risk\_vet,  
Occupational\_Exposure\_SAureus\_Risk\_pig, Occupational\_Exposure\_SAureus\_Risk,  
Occupational\_Exposure\_SAureus\_PR\_poultry, Occupational\_Exposure\_SAureus\_PR\_Pig,  
Occupational\_Exposure\_SAureus\_PR, Occupational\_Exposure\_SAureus\_OR\_vets,  
Occupational\_Exposure\_SAureus\_OR\_pig, Occupational\_Exposure\_SAureus\_OR\_cattle,  
Occupational\_Exposure\_SAureus\_OR,  
Occupational\_Exposure\_SAureus\_Genes, Occupational\_Exposure\_Entero\_Risk\_pig,  
Occupational\_Exposure\_SAureus\_Genes\_pig, Occupational\_Exposure\_haemo\_PR\_pig,  
Occupational\_Exposure\_epi,  
OR, OR\_Animal\_contact, OR\_Contact\_inf\_person, OR\_Contaminated\_room, OR\_Eating\_Meat,  
OR\_Family\_mem\_colonised, OR\_Family\_member\_occu\_exp, OR\_Fomites,  
OR\_Livestock\_to\_drink\_water,OR\_Mother\_to\_Child,  
OR\_Nearbyfarm\_to\_human, OR\_Occupational\_Exp, OR\_Pet\_to\_human, OR\_Prior\_col\_roomoccu,  
OR\_Space\_sharing, OR\_Travelling, OR\_Waterdrink\_to\_human,  
OR.bathingshowering, or.cont.inf.abau, or.cont.inf.saureus, or.fam.mem.col.ecoli,  
or.fam.mem.col.saureus, or.fam.occu.farm,or.fam.occu.hosp, or.general, or.livedrink\_cattle,  
or.livedrink\_pig, or.livedrink\_poultry,  
or.meat\_ecoli, or.mother.to.child, or.occu.exp.cattle.saureus, or.occu.exp.pig.saureus,  
or.occu.exp.poultry, or.occu.exp.vets.sarues, OR.pet.tp.human.staph, OR.pet.tp.human.ecoli,  
or.red, OR.sharingroom.or, OR.soap, OR.travel\_Africa\_enter, OR.travel\_Amerika\_enter,  
OR.travel\_Asia\_entero, OR.travel\_Europe\_entero, OR.travel\_LA\_entero,

OR.travel\_SA\_Ecoli, OR.travel\_SA\_SAreus, OR.travel\_SEA\_Enterо, OR.travel\_WA\_entero, OR.travel\_SA\_Enterо, or.white,

organtransfer\_risk, Other\_Bathing\_Showering, Other\_soap, Pet\_to\_human, Pet\_to\_human\_ecoli\_OR, Pet\_to\_human\_entero\_OR, Pet\_to\_human\_staph\_OR, pet\_to\_pet, pet\_to\_pet\_risk\_speudi,

pig\_to\_air\_Ecoli\_Risk, pig\_to\_env\_ecoli, pig\_to\_pig\_Saureus, Pig\_to\_air\_Sareus\_Risk,

poultry\_to\_air\_Ecoli\_Risk, poultry\_to\_env, PR, PR\_alles, PR\_Fam\_Col, PR\_Fam\_Occu\_Exp, PR\_Occupation\_Exp, PR\_Pet\_Human, PR\_SpaceShare, PR\_Travel,pr.fam.mem.col.enter,

pr.meat\_ecoli, pr.occu.exp.saureus.pig, pr.occu.exp.saureus.poultry, pr.redmeat,

Prior\_col\_patient, Prior\_col\_patient\_abau, Prior\_col\_patient\_pseu, r0.animalanimal, r0.cont.inf.saureus, red\_pr, Risk,

redmeat\_or, Risk\_Animal\_to\_water, Risk\_Animal\_to\_Air, Risk\_Animal\_to\_Animal, Risk\_Animal\_to\_environment, Risk\_Cont\_Inf\_Person, Risk\_Fam\_mem\_occu\_exposure, Risk\_Fomites,

Risk\_Food\_to\_animal, Risk\_Household\_Col, Risk\_hum\_to\_neareenvironment, Risk\_Human\_to\_Air, Risk\_Intervention, Risk\_Water\_drink\_Human, Risk\_Water\_exposure\_to\_human,

Risk\_Travelling, Risk\_Pet\_to\_human\_saureus, Risk\_Pet\_to\_human, Risk\_Organ, Risk\_Occupational\_Exposure, Risk\_Motheranimal\_to\_animalchild, Risk\_Mother\_to\_child,

RO\_VRE\_humantonrear, RR, rr.contact.inf.saureus, se.logit.AtoAcattle, se.logit.AtoApig, se.logit.AtoApigAreus, se.logit.AtoApoultry, se.logit.breast, se.logit.cont.inf.abau,

se.logit.cont.inf.ecoli.risk, se.logit.cont.inf.epi.risk, se.logit.cont.inf.pau, se.logit.cont.inf.pau.genes, se.logit.cont.inf.saureus.Risk, se.logithumantonearenav.VRE.risk, se.logithumantonearenav.acalco.risk, se.logitGenes\_Pet\_to\_human\_saureus\_horse,

se.logitGenes\_Pet\_to\_human\_saureus, se.logit.risk.travel.wa.entero, se.logit.risk.travel.SA.entero, se.logit.risk.travel.SEA.entero, se.logit.risk.travel.LA\_enter, se.logit.risk.travel.eu.ecoli,

se.logit.risk.travel.entero.eu, se.logit.risk.travel.centraleast.entero,

se.logit.cont.inf.saureus.genes, se.logit.cont.inf.vre.Risk, se.logit.fam.pau.genes, se.logit.Fam\_col\_ecoli\_genes, se.logit.fam\_col\_sau\_genes\_T, se.logit.fam\_col\_sau\_risk,

se.logit.Family\_member\_colonised\_ecoli\_risk, se.logit.mother.to.child,se.logit.model.risk.travel.ecoli.LA,se.logit.mother.to.child.GB,

se.logit.fam\_col\_sau\_genes, se.logit.occu.exp.genes.saureus.pig, se.logit.occu.exp.pig.entero, se.logit.occu.exp.pig.saureus,

se.logithumantonearenav.saureus.risk, se.logitGenes\_motheranimal\_to\_baby, se.logit.occu.exp.staph.risk.pig, se.logit.occu.exp.vet.risk, se.logit.pet.Spseudo,

se.logit.pig\_env, se.logit.poultry\_env, se.logit.risk.pethuman.saureus,

se.logit.risk.travel.africa.ecoli, se.logithumantonearenav.abau.risk, se.logit.risk.travel.SA.ecoli, se.logit.risk.travel.africa.entero, se.logit.risk.travel.asia.ecoli, se.logit.risk.travel.asia.entero,

Sharing\_room, Sharing\_room\_entero\_OR, Sharing\_water\_source\_with\_animals, Space\_sharing,  
Stats, veggies, water\_to\_plant,

Bacteria\_Animal\_to\_Air, Bacteria\_Animal\_to\_environment, Bacteria\_Breast\_feeding,  
Bacteria\_Contaminated\_room, Bacteria\_Contact\_with\_infected, Bacteria\_Eating\_meat,

Bacteria\_Fam\_Occu\_Exp, Bacteria\_Family\_mem\_colonised, Bacteria\_human\_to\_nearbyenv,  
Bacteria\_livestock\_to\_drinkw, Bacteria\_Non\_commercial\_animal\_keeping, Bacteria\_Occupational,

Bacteria\_Mother\_to\_child, Bacteria\_Pet\_to\_human, Bacteria\_Travelling,  
Bacteria\_prior\_col\_patient, Bacteria\_Sharing\_water\_source\_with\_animals, Bacteria\_space\_sharing,

Countries, Methods, MethodofEstimation, Pathogen, Table\_Country, test, weights,  
Table\_TransmissionRouteGroup, TransmissionRoute)

##### Extra printing we did

```
Author_title_transg_bact<-Transmission[,c(21,22,2,35,6,34,18,17)]
```

```
write.xlsx(Author_title_transg_bact, "PATH TO YOUR PC/file.xlsx")
```

```
#REPLACE PATH TO YOUR PC with the location on you pc where you want to save the data
```

```
#view(Transmission)
```

```
#### Inspect pooled estimates
```

```
Pooled_AMS_AMR<-subset(Transmission, Transmission$Defined.as.resistant=="both")
```

```
rm(Pooled_AMS_AMR)
```
